# Supplementary material for: Single-cell RNA sequencing reveals intrinsic and extrinsic regulatory heterogeneity in yeast responding to stress
Source: PLoS Biol. 2017 Dec 14;15(12):e2004050. doi: 10.1371/journal.pbio.2004050 (PMC5746276; doi:10.1371/journal.pbio.2004050)
Supplement: S4 Table — (XLSX) [file pbio.2004050.s004.xlsx]

## Sheet: fishOscope_list_cluster1.txt
Oscope_Cluster1	Identified as Cell-cycle regulated (Spellman 1998)	Annotation		Oscope_Cluster2	Identified as Cell-cycle regulated (Spellman 1998)	Annotation
YBL002W	yes	YBL002W ... HTB2 chromatin assembly or disassem DNA binding nuclear nucleosome | YBL003C	.	YBL002W	yes	YBL002W ... HTB2 chromatin assembly or disassem DNA binding nuclear nucleosome | YBL003C
YBL003C	yes	YBL003C ... HTA2 chromatin assembly or disassem DNA binding nuclear nucleosome | YBL004W	.	YBR008C	yes	YBR008C ... FLR1 response to toxin multidrug transporter activity integral to plasma membrane | YBR009C
YBR009C	yes	YBR009C ... HHF1 chromatin assembly or disassem DNA binding nuclear nucleosome | YBR010W	.	YBR053C	yes	YBR053C iESR cluster YBR053C biological process unknown molecular function unknown cellular component unknown | YBR054W
YBR010W	yes	YBR010W ... HHT1 chromatin assembly or disassem DNA binding nucleus* | YBR011C	.	YBR069C	yes	YBR069C ... TAT1 amino acid transport amino acid transporter activity plasma membrane | YBR070C
YDL055C	yes	YDL055C ... PSA1 protein amino acid glycosylati mannose-1-phosphate guanylyltransfecytoplasm | YDL056W	.	YBR083W	yes	YBR083W ... TEC1 pseudohyphal growth* specific RNA polymerase II transcrinucleus | YBR084C-A
YDL127W	yes	YDL127W ... PCL2 cell cycle cyclin-dependent protein kinase regcyclin-dependent protein kinase hol | YDL128W	.	YBR158W	yes	YBR158W ... AMN1 negative regulation of exit fr protein binding cytoplasm* | YBR159W
YDR033W	yes	YDR033W ... MRH1 biological process unknown molecular function unknown mitochondrion* | YDR034C	.	YCL024W	yes	YCL024W ... KCC4 protein amino acid phosphoryla protein kinase activity bud neck | YCL025C
YDR077W	yes	YDR077W ... SED1 cell wall organization and bio structural constituent of cell wallmitochondrion* | YDR078C	.	YCR024C-A	yes	YCR024C-A ... PMP1 cation transport enzyme regulator activity plasma membrane* | YCR024C-B
YDR224C	yes	YDR224C ... HTB1 chromatin assembly or disassem DNA binding nuclear nucleosome | YDR225W	.	YDL179W	yes	YDL179W ... PCL9 cell cycle cyclin-dependent protein kinase regcyclin-dependent protein kinase hol | YDL180W
YDR225W	yes	YDR225W ... HTA1 chromatin assembly or disassem DNA binding nuclear nucleosome | YDR226W	.	YDR055W	yes	YDR055W ... PST1 cell wall organization and bio molecular function unknown cell wall (sensu Fungi) | YDR056C
YDR261C	yes	YDR261C ... EXG2 cell wall organization and bio "glucan 1,3-beta-glucosidase activit"cell wall (sensu Fungi) | YDR262W	.	YDR130C	yes	YDR130C ... FIN1 biological process unknown protein binding nucleus* | YDR131C
YDR461W	yes	YDR461W ... MFA1 signal transduction during con mating pheromone activity soluble fraction* | YDR462W	.	YDR481C	yes	YDR481C ... PHO8 protein amino acid dephosphory alkaline phosphatase activity vacuolar membrane (sensu Fungi) | YDR482C
YEL061C	yes	YEL061C ... CIN8 mitotic sister chromatid segre microtubule motor activity mitochondrion* | YEL062W	.	YER032W	yes	YER032W ... FIR1 mRNA polyadenylylation molecular function unknown bud neck | YER033C
YER018C	yes	YER018C ... SPC25 chromosome segregation* structural constituent of cytoskelecondensed nuclear chromosome kineto | YER019C-A	.	YER070W	yes	YER070W PAC cluster RNR1 DNA replication ribonucleoside-diphosphate reductascytoplasm* | YER071C
YFL026W	yes	YFL026W ... STE2 response to pheromone during c mating-type alpha-factor pheromone integral to plasma membrane | YFL027C	.	YER111C	yes	YER111C ... SWI4 G1/S transition of mitotic cel transcription factor activity nucleus | YER112W
YFL037W	yes	YFL037W ... TUB2 mitotic sister chromatid segre structural constituent of cytoskelespindle pole body* | YFL038C	.	YFL037W	yes	YFL037W ... TUB2 mitotic sister chromatid segre structural constituent of cytoskelespindle pole body* | YFL038C
YGL116W	yes	YGL116W ... CDC20 mitotic sister chromatid segre enzyme activator activity anaphase-promoting complex | YGL117W	.	YGL008C	yes	YGL008C PAC cluster PMA1 regulation of pH* "hydrogen-exporting ATPase activity,"plasma membrane* | YGL009C
YGL200C	yes	YGL200C ... EMP24 ER to Golgi transport* molecular function unknown endoplasmic reticulum* | YGL201C	.	YGL028C	yes	YGL028C ... SCW11 cytokinesis, completion of sep "glucan 1,3-beta-glucosidase activit"cell wall (sensu Fungi) | YGL029W
YHR215W	yes	YHR215W ... PHO12 biological process unknown acid phosphatase activity vacuole (sensu Fungi) | YHR216W	.	YGR041W	yes	YGR041W ... BUD9 bud site selection molecular function unknown bud neck | YGR042W
YIL123W	yes	YIL123W ... SIM1 microtubule cytoskeleton organ molecular function unknown cell wall (sensu Fungi) | YIL124W	.	YGR044C	yes	YGR044C ... RME1 meiosis* specific transcriptional repressor nucleus | YGR045C
YIL144W	yes	YIL144W ... TID3 chromosome segregation* structural constituent of cytoskelecondensed nuclear chromosome kineto | YIL145C	.	YGR086C	yes	YGR086C ... PIL1 response to heat protein kinase inhibitor activity cytoplasm* | YGR087C
YJL158C	yes	YJL158C ... CIS3 cell wall organization and bio structural constituent of cell wallendoplasmic reticulum* | YJL159W	.	YGR188C	yes	YGR188C ... BUB1 protein amino acid phosphoryla protein binding* nucleus* | YGR189C
YJL159W	yes	YJL159W ... HSP150 cell wall organization and bio structural constituent of cell wallcell wall (sensu Fungi) | YJL160C	.	YGR189C	yes	YGR189C ... CRH1 biological process unknown molecular function unknown cell wall (sensu Fungi)* | YGR190C
YKL096W	yes	YKL096W ... CWP1 cell wall organization and bio structural constituent of cell wallcell wall (sensu Fungi) | YKL096W-A	.	YGR279C	yes	YGR279C ... SCW4 conjugation with cellular fusi glucosidase activity cell wall (sensu Fungi) | YGR280C
YKL096W-A	yes	YKL096W-A ... CWP2 cell wall organization and bio structural constituent of cell wallcell wall (sensu Fungi) | YKL097C	.	YHR143W	yes	YHR143W ... DSE2 cell wall organization and bio "glucan 1,3-beta-glucosidase activit"cell wall (sensu Fungi)* | YHR143W-A
YKL116C	yes	YKL116C ... PRR1 MAPKKK cascade receptor signaling protein serine/tcytoplasm | YKL117W	.	YJL078C	yes	YJL078C ... PRY3 biological process unknown molecular function unknown cell wall (sensu Fungi) | YJL079C
YKL164C	yes	YKL164C ... PIR1 cell wall organization and bio structural constituent of cell wallcell wall (sensu Fungi) | YKL165C	.	YJL158C	yes	YJL158C ... CIS3 cell wall organization and bio structural constituent of cell wallendoplasmic reticulum* | YJL159W
YKR042W	yes	YKR042W ... UTH1 mitochondrion organization and molecular function unknown cell wall (sensu Fungi)* | YKR043C	.	YJL159W	yes	YJL159W ... HSP150 cell wall organization and bio structural constituent of cell wallcell wall (sensu Fungi) | YJL160C
YLR342W	yes	YLR342W ... FKS1 cell wall organization and bio "1,3-beta-glucan synthase activity"actin cortical patch* | YLR342W-A	.	YJL217W	yes	YJL217W … REE1 biological process unknown molecular function unknown | Cytoplasmic protein involved in the regulation of enolase (ENO1); mRNA expression is induced by calcium shortage, copper deficiency (via Mac1p) and the presence of galactose (via Gal4p); mRNA expression is also regulated by the cell cycleYJL218W
YLR372W	yes	YLR372W PAC cluster SUR4 sphingolipid biosynthesis* fatty acid elongase activity endoplasmic reticulum* | YLR373C	.	YJR006W	yes	YJR006W … POL31 (HYS2) response to heat* ATPase activity endoplasmic reticulum | DNA polymerase III (delta) subunit, essential for cell viability; involved in DNA replication and DNA repairYJR007W
YML123C	yes	YML123C ... PHO84 phosphate transport* inorganic phosphate transporter actintegral to plasma membrane | YML124C	.	YKL096W-A	yes	YKL096W-A ... CWP2 cell wall organization and bio structural constituent of cell wallcell wall (sensu Fungi) | YKL097C
YMR003W	yes	YMR003W … AIM34 biological process unknown molecular function unknown | Protein of unknown function; GFP-fusion protein localizes to the mitochondria; null mutant is viable and displays reduced frequency of mitochondrial genome lossYMR004W	.	YKL164C	yes	YKL164C ... PIR1 cell wall organization and bio structural constituent of cell wallcell wall (sensu Fungi) | YKL165C
YMR189W	yes	YMR189W ... GCV2 one-carbon compound metabolism glycine dehydrogenase (decarboxylatmitochondrion* | YMR190C	.	YKR013W	yes	YKR013W ... PRY2 biological process unknown molecular function unknown vacuole (sensu Fungi)* | YKR014C
YMR215W	yes	YMR215W PAC cluster GAS3 biological process unknown "1,3-beta-glucanosyltransferase acti"cell wall (sensu Fungi) | YMR216C	.	YLL012W	yes	YLL012W ... YEH1 sterol metabolism sterol esterase activity integral to membrane* | YLL013C
YMR305C	yes	YMR305C ... SCW10 conjugation with cellular fusi glucosidase activity cytoplasm* | YMR306C-A	.	YLR079W	yes	YLR079W ... SIC1 G1/S transition of mitotic cel protein binding* cytoplasm* | YLR080W
YMR307W	yes	YMR307W PAC cluster GAS1 cell wall organization and bio "1,3-beta-glucanosyltransferase acti"mitochondrion* | YMR308C	.	YLR209C	yes	YLR209C ... PNP1 purine nucleoside catabolism purine-nucleoside phosphorylase actcellular component unknown | YLR210W
YNL030W	yes	YNL030W ... HHF2 chromatin assembly or disassem DNA binding nuclear nucleosome | YNL031C	.	YLR286C	yes	YLR286C ... CTS1 cytokinesis, completion of sep endochitinase activity endoplasmic reticulum* | YLR287C
YNL031C	yes	YNL031C ... HHT2 chromatin assembly or disassem DNA binding nuclear nucleosome | YNL032W	.	YLR438W	yes	YLR438W ... CAR2 arginine catabolism ornithine-oxo-acid transaminase actcytoplasm* | YLR439W
YNL058C	yes	YNL058C ... YNL058C biological process unknown molecular function unknown vacuole (sensu Fungi) | YNL059C	.	YML052W	yes	YML052W ... SUR7 sporulation (sensu Fungi) molecular function unknown mitochondrion* | YML053C
YNL145W	yes	YNL145W ... MFA2 signal transduction during con mating pheromone activity extracellular region | YNL146C-A	.	YML058W	yes	YML058W ... SML1 mitochondrion organization and enzyme inhibitor activity cytoplasm* | YML058W-A
YNL300W	yes	YNL300W … TOS6 biological process unknown molecular function unknown | Glycosylphosphatidylinositol-dependent cell wall protein, expression is periodic and decreases in respone to ergosterol perturbation or upon entry into stationary phase; depletion increases resistance to lactic acidYNL301C	.	YMR001C	yes	YMR001C ... CDC5 protein amino acid phosphoryla protein serine/threonine kinase actnucleus* | YMR001C-A
YNR009W	yes	YNR009W … PAC cluster NRM1 biological process unknown molecular function unknown | Transcriptional co-repressor of MBF (MCB binding factor)-regulated gene expression; Nrm1p associates stably with promoters via MBF to repress transcription upon exit from G1 phaseYNR010W	.	YMR003W	yes	YMR003W … AIM34 biological process unknown molecular function unknown | Protein of unknown function; GFP-fusion protein localizes to the mitochondria; null mutant is viable and displays reduced frequency of mitochondrial genome lossYMR004W
YOL012C	yes	YOL012C ... HTZ1 regulation of transcription fr chromatin binding nuclear chromatin* | YOL013C	.	YMR215W	yes	YMR215W PAC cluster GAS3 biological process unknown "1,3-beta-glucanosyltransferase acti"cell wall (sensu Fungi) | YMR216C
YOL158C	yes	YOL158C ... ENB1 ferric-enterobactin transport ferric-enterobactin transporter actintegral to membrane* | YOL159C	.	YNL078W	yes	YNL078W ... NIS1 regulation of mitosis molecular function unknown nucleus* | YNL079C
YOR066W	yes	YOR066W … MSA1 biological process unknown molecular function unknown | Activator of G1-specific transcription factors, MBF and SBF; involved in regulation of the timing of G1-specific gene transcription and cell cycle initiation; localization is cell-cycle dependent and regulated by Cdc28p phosphorylationYOR067C	.	YNL145W	yes	YNL145W ... MFA2 signal transduction during con mating pheromone activity extracellular region | YNL146C-A
YOR247W	yes	YOR247W ... SRL1 nucleobase, nucleoside, nucleo molecular function unknown cytoplasm* | YOR248W	.	YNL192W	yes	YNL192W ... CHS1 cytokinesis, completion of sep chitin synthase activity plasma membrane* | YNL193W
YPL127C	yes	YPL127C ... HHO1 regulation of transcription, D DNA binding nucleus* | YPL128C	.	YNL289W	yes	YNL289W ... PCL1 cell cycle cyclin-dependent protein kinase regcyclin-dependent protein kinase hol | YNL290W
YBR078W		YBR078W ... ECM33 cell wall organization and bio molecular function unknown mitochondrion* | YBR079C	.	YNL327W	yes	YNL327W ... EGT2 cytokinesis cellulase activity cell wall (sensu Fungi) | YNL328C
YLR110C		YLR110C ... CCW12 cell wall organization and bio molecular function unknown cell wall (sensu Fungi) | YLR111W	.	YNR067C	yes	YNR067C ... DSE4 cytokinesis, completion of sep "glucan 1,3-beta-glucosidase activit"cell wall (sensu Fungi)* | YNR068C
YHR012W		YHR012W ... VPS29 retrograde transport, endosome molecular function unknown endosome* | YHR013C	.	YOL007C	yes	YOL007C … CSI2 biological process unknown molecular function unknown | Protein of unknown function; green fluorescent protein (GFP)- fusion protein localizes to the mother side of the bud neck and the vacuole; YOL007C is not an essential geneYOL008W
YBR058C-A		YBR058C-A ... TSC3 sphingolipid biosynthesis* enzyme activator activity membrane fraction* | YBR059C	.	YOL012C	yes	YOL012C ... HTZ1 regulation of transcription fr chromatin binding nuclear chromatin* | YOL013C
YCL017C		YCL017C ... NFS1 iron ion homeostasis* cystathionine gamma-lyase activity mitochondrion | YCL018W	.	YOL019W	yes	YOL019W ... YOL019W biological process unknown molecular function unknown plasma membrane* | YOL019W-A
YGL256W		YGL256W ... ADH4 fermentation "alcohol dehydrogenase activity, zin"mitochondrion | YGL257C	.	YOR247W	yes	YOR247W ... SRL1 nucleobase, nucleoside, nucleo molecular function unknown cytoplasm* | YOR248W
YOR296W		YOR296W ... YOR296W biological process unknown molecular function unknown cytoplasm | YOR297C	.	YOR264W	yes	YOR264W ... DSE3 biological process unknown molecular function unknown bud neck | YOR265W
YGR038C-B		YGR038C-B YGR038C-B Ö TRANSPOSABLE TY ELEMENTYGR068W-A	.	YPL158C	yes	YPL158C … AIM44 biological process unknown molecular function unknown | Protein of unknown function; GFP-fusion protein localizes to the bud neck; transcription is regulated by Swi5p; null mutant displays elevated frequency of mitochondrial genome lossYPL159C
YDR014W		YDR014W ... RAD61 response to radiation molecular function unknown nucleus | YDR014W-A	.	YPL163C	yes	YPL163C ... SVS1 response to chemical substance molecular function unknown cell wall (sensu Fungi)* | YPL164C
YIR007W		YIR007W ... YIR007W biological process unknown molecular function unknown cytoplasm | YIR008C	.	YPR149W	yes	YPR149W iESR cluster NCE102 protein secretion molecular function unknown cytoplasm* | YPR150W
YNL281W		YNL281W ... HCH1 response to stress* chaperone activator activity cytoplasm* | YNL282W	.	YMR122W-A		YMR122W-A ... YMR122W-A biological process unknown molecular function unknown cytoplasm* | YMR123W
YBR201W		YBR201W ... DER1 ER-associated protein cataboli molecular function unknown endoplasmic reticulum membrane | YBR202W	.	YCR024C-B		YCR024C-B ... YCR024C-B biological process unknown molecular function unknown cellular component unknown | YCR025C
YLR046C		YLR046C ... YLR046C biological process unknown molecular function unknown integral to membrane | YLR047C	.	YCL052C		YCL052C ... PBN1 GPI anchor biosynthesis* mannosyltransferase activity endoplasmic reticulum | YCL054W
YNL129W		YNL129W ... NRK1 nicotinamide riboside metaboli nicotinamide riboside kinase activicytoplasm | YNL130C	.	YKL020C		YKL020C ... SPT23 positive regulation of transcr DNA binding* nucleus* | YKL021C
YPR166C		YPR166C ... MRP2 protein biosynthesis structural constituent of ribosome mitochondrial small ribosomal subun | YPR167C	.	YDL073W		YDL073W ... YDL073W biological process unknown molecular function unknown cellular component unknown | YDL074C
YJR073C		YJR073C ... OPI3 phosphatidylcholine biosynthes phosphatidyl-N-methylethanolamine Nmitochondrion* | YJR074W	.	YNL066W		YNL066W PAC cluster SUN4 mitochondrion organization and glucosidase activity cell wall (sensu Fungi)* | YNL067W
YJL055W		YJL055W ... YJL055W biological process unknown molecular function unknown cytoplasm* | YJL056C	.	YOL086C		YOL086C ... ADH1 fermentation alcohol dehydrogenase activity cytosol | YOL086W-A
YJR135C		YJR135C ... MCM22 chromosome segregation protein binding condensed nuclear chromosome kineto | YJR135W-A	.	YKR080W		YKR080W ... MTD1 one-carbon compound metabolism methylenetetrahydrofolate dehydrogecytosol | YKR081C
YKL051W		YKL051W ... SFK1 actin cytoskeleton organizatio molecular function unknown plasma membrane | YKL052C	.	YAL020C		YAL020C ... ATS1 budding cell bud growth* molecular function unknown cytoplasm | YAL021C
YJL166W		YJL166W ... QCR8 aerobic respiration* ubiquinol-cytochrome-c reductase acrespiratory chain complex III (sens | YJL167W	.	YKL197C		YKL197C ... PEX1 peroxisome organization and bi ATPase activity peroxisome | YKL198C
YJR149W		YJR149W ... YJR149W biological process unknown molecular function unknown cytoplasm | YJR150C	.	YLR181C		YLR181C ... VTA1 late endosome to vacuole trans molecular function unknown endosome* | YLR182W
YNL218W		YNL218W ... MGS1 DNA replication* ATPase activity* nucleus | YNL219C	.	YNR051C		YNR051C ... BRE5 protein deubiquitination molecular function unknown cytoplasm | YNR052C
YHL004W		YHL004W ... MRP4 protein biosynthesis structural constituent of ribosome*mitochondrial small ribosomal subun | YHL005C	.	YGR192C		YGR192C ... TDH3 glycolysis* glyceraldehyde-3-phosphate dehydrogcytoplasm* | YGR193C
YPR165W		YPR165W ... RHO1 cell wall organization and bio GTPase activity* mitochondrion* | YPR166C	.	YGR040W		YGR040W ... KSS1 invasive growth (sensu Sacchar MAP kinase activity nucleus | YGR041W
YIL064W		YIL064W … SEE1 biological process unknown S-adenosylmethionine-dependent | Protein with a role in intracellular transport; has sequence similarity to S-adenosylmethionine-dependent methyltransferases of the seven beta-strand familyYIL065C	.	YPL262W		YPL262W ... FUM1 tricarboxylic acid cycle* fumarate hydratase activity cytosol* | YPL263C
YNL097C		YNL097C ... PHO23 chromatin modification histone deacetylase activity nucleus* | YNL097C-B	.	YNR013C		YNR013C ... PHO91 phosphate transport phosphate transporter activity membrane | YNR014W
YDL013W		YDL013W … SLX5 (HEX3) mitochondrial matrix protein i protein transporter activity mitochondrion* | Subunit of the Slx5-Slx8 SUMO-targeted ubiquitin ligase (STUbL) complex, stimulated by SUMO-modified substrates; contains a RING domain and two SIMs (SUMO-interacting motifs); forms SUMO-dependent nuclear foci, including DNA repair centersYDL014W	.	YLR390W-A		YLR390W-A ... CCW14 cell wall organization and bio structural constituent of cell wallmitochondrion* | YLR392C
YLR055C		YLR055C ... SPT8 histone acetylation* transcription cofactor activity nucleus* | YLR056W	.	YPR079W		YPR079W ... MRL1 vacuolar transport signal sequence binding cytoplasm* | YPR080W
YOR014W		YOR014W ... RTS1 protein biosynthesis* protein phosphatase type 2A activitcytoplasm* | YOR015W	.	YIR039C		YIR039C iESR cluster YPS6 biological process unknown aspartic-type endopeptidase activitcell wall (sensu Fungi) | YIR040C
YNL045W		YNL045W … LAP2 lipid metabolism* aminopeptidase activity* | Leucyl aminopeptidase yscIV (leukotriene A4 hydrolase) with epoxide hydrolase activity, metalloenzyme containing one zinc atom; green fluorescent protein (GFP)-fusion protein localizes to the cytoplasm and nucleusYNL046W	.	YNL190W		YNL190W ... YNL190W response to dessication molecular function unknown cell wall (sensu Fungi) | YNL191W
YFL017W-A		YFL017W-A ... SMX2 nuclear mRNA splicing, via spl "RNA splicing factor activity, trans"U4/U6 x U5 tri-snRNP complex | YFL018C	.	YOL159C		YOL159C ... YOL159C biological process unknown molecular function unknown soluble fraction | YOL159C-A
YDR282C		YDR282C ... YDR282C biological process unknown molecular function unknown cellular component unknown | YDR283C	.	YKL092C		YKL092C ... BUD2 bipolar bud site selection* signal transducer activity* intracellular | YKL093W
YIL145C		YIL145C ... PAN6 pantothenate biosynthesis pantoate-beta-alanine ligase activicytoplasm* | YIL146C	.	YBR295W		YBR295W ... PCA1 iron ion homeostasis* "ATPase activity, coupled to transme"membrane | YBR296C
YKL082C		YKL082C PAC cluster RRP14 establishment of cell polarity molecular function unknown nucleolus | YKL083W	.	YDR198C		YDR198C … RKM2 biological process unknown molecular function unknown | Ribosomal protein lysine methyltransferase, responsible for trimethylation of the lysine residue at position 3 of Rpl12Ap and Rpl12BpYDR199W
YFR038W		YFR038W … IRC5 biological process unknown helicase activity | Putative ATPase containing the DEAD/H helicase-related sequence motif; null mutant displays increased levels of spontaneous Rad52p fociYFR039C	.	YBL025W		YBL025W ... RRN10 transcription from RNA polymer RNA polymerase I transcription factRNA polymerase I upstream activatin | YBL026W
YOR266W		YOR266W ... PNT1 inner mitochondrial membrane o molecular function unknown mitochondrial inner membrane | YOR267C	.	YGL096W		YGL096W iESR cluster TOS8 G1/S-specific transcription in transcription factor activity nucleus | YGL097W
YML105C		YML105C ... SEC65 protein-ER targeting* molecular function unknown signal recognition particle (sensu | YML106W	.	YGL130W		YGL130W ... CEG1 positive regulation of transcr mRNA guanylyltransferase activity nucleus | YGL131C
YKL168C		YKL168C ... KKQ8 biological process unknown protein kinase activity cytoplasm | YKL169C	.	YLR340W		YLR340W PAC cluster RPP0 translational elongation* structural constituent of ribosome cytosolic large ribosomal subunit ( | YLR341W
YDL171C		YDL171C ... GLT1 glutamate biosynthesis glutamate synthase (NADH) activity mitochondrion* | YDL172C	.	YOL128C		YOL128C ... YGK3 protein amino acid phosphoryla glycogen synthase kinase 3 activitycellular component unknown | YOL129W
YGR295C		YGR295C ... COS6 biological process unknown molecular function unknown vacuole (sensu Fungi) | YGR296C-A	.	YFL021W		YFL021W ... GAT1 transcription initiation from specific RNA polymerase II transcrinucleus | YFL022C
YCL021W-A		YCL021W-A ... YCL021W-A biological process unknown molecular function unknown cellular component unknown | YCL022C	.	YNL260C		YNL260C ... YNL260C biological process unknown molecular function unknown cytoplasm* | YNL261W
YOR343W-B		YOR343W-B YOR343W-B Ö TRANSPOSABLE TY ELEMENTYOR396C-A	.	YHR087W		YHR087W … iESR cluster RTC3 RNA metabolism molecular function unknown | Protein of unknown function involved in RNA metabolism; has structural similarity to SBDS, the human protein mutated in Shwachman-Diamond Syndrome (the yeast SBDS ortholog = SDO1); null mutation suppresses cdc13-1 temperature sensitivityYHR088W
YNL094W		YNL094W ... APP1 actin filament organization* molecular function unknown actin cortical patch* | YNL095C	.	YDL088C		YDL088C ... ASM4 mRNA-nucleus export* structural molecule activity nuclear pore | YDL089W
YAR028W		YAR028W ... YAR028W biological process unknown molecular function unknown cellular component unknown | YAR029W	.	YER161C		YER161C ... SPT2 negative regulation of transcr DNA binding nucleus | YER162C
YMR045C		YMR045C YMR045C Ö TRANSPOSABLE TY ELEMENTYMR046C	.	YDR148C		YDR148C ... KGD2 tricarboxylic acid cycle* dihydrolipoyllysine-residue succinymitochondrial matrix* | YDR149C
YLL005C		YLL005C ... SPO75 sporulation (sensu Fungi)* molecular function unknown cellular component unknown | YLL006W	.	YOR180C		YOR180C ... DCI1 fatty acid beta-oxidation dodecenoyl-CoA delta-isomerase actiperoxisomal matrix | YOR181W
YDL083C		YDL083C RP cluster RPS16B protein biosynthesis structural constituent of ribosome cytosolic small ribosomal subunit ( | YDL084W	.	YDR129C		YDR129C ... SAC6 endocytosis* "protein binding, bridging*" actin cortical patch* | YDR130C
YFR028C		YFR028C ... CDC14 protein amino acid dephosphory phosphoprotein phosphatase activitynucleus* | YFR029W	.	YBL005W		YBL005W ... PDR3 regulation of transcription fr DNA binding* cytoplasm* | YBL006C
YHR202W		YHR202W ... YHR202W biological process unknown molecular function unknown vacuole (sensu Fungi)* | YHR203C	.	YJR056C		YJR056C ... YJR056C biological process unknown molecular function unknown cytoplasm* | YJR057W
YJL052W		YJL052W ... TDH1 glycolysis* glyceraldehyde-3-phosphate dehydrogcytosol* | YJL053W	.	YOR164C		YOR164C … GET4 biological process unknown molecular function unknown | Protein of unknown function, highly conserved across species and homologous to human gene C7orf20; interacts with Mdy2pYOR165W
YLR177W		YLR177W ... YLR177W biological process unknown molecular function unknown cytoplasm | YLR178C	.	YBR026C		YBR026C iESR cluster ETR1 aerobic respiration* enoyl-[acyl-carrier protein] reductmitochondrion | YBR027C
YDR524C-B		YDR524C-B ... YDR524C-B biological process unknown molecular function unknown cellular component unknown | YDR524W-C	.	YGR100W		YGR100W ... MDR1 biological process unknown Rab GTPase activator activity cytoplasm* | YGR101W
YGR054W		YGR054W PAC cluster YGR054W translational initiation translation initiation factor activcytosolic small ribosomal subunit ( | YGR055W	.	YHR020W		YHR020W PAC cluster YHR020W tRNA aminoacylation for protei proline-tRNA ligase activity cellular component unknown | YHR021C
