# Supplementary material for: Single-cell RNA sequencing reveals intrinsic and extrinsic regulatory heterogeneity in yeast responding to stress
Source: PLoS Biol. 2017 Dec 14;15(12):e2004050. doi: 10.1371/journal.pbio.2004050 (PMC5746276; doi:10.1371/journal.pbio.2004050)
Supplement: S6 Table — TF, transcription factor. (XLSX) [file pbio.2004050.s006.xlsx]

## Sheet: Sheet1
Cluster group With Significant P-value (Genes in each set are availble in Table 7)	Gene-set enrichment: # of cells with -log(P) >= 4
Cluster_YeasTractDirect_IFH1	95
Cluster_YeasTractDirect_SFP1	93
Cluster_Harbison_FHL1_YPD	85
Cluster_YeasTractDirect_HOT1	71
Cluster_Huebert-Msn2induced	39
Cluster_HoseDot6Tod6_2obs1.5XrepDefect	33
Cluster_MacIsaac_RAP1	19
Cluster_YeasTractDirect_SKO1	18
Cluster_YeasTractDirect_ADR1	16	* not significant if remove iESR genes from list
Cluster_YeasTractDirect_GAT3	7	* not significant if remove RP genes from the list
Cluster_MacIsaac_MBP1	5
	T-test analysis: # of cells with -log(P) >=4
Cluster_YeasTractDirect_SFP1	138
Cluster_YeasTractDirect_IFH1	137
Cluster_Harbison_FHL1_YPD	133
Cluster_HoseDot6Tod6_2obs1.5XrepDefect	17
Cluster_Huebert-Msn2induced	44
Cluster_YeasTractDirect_HOT1	53
Cluster_YeasTractDirect_SKO1	11
Cluster_YeasTractDirect_ADR1	11	* not significant if remove iESR genes from list
Cluster_YeasTractDirect_GAT3	11	* not significant if remove RP genes from the list
Cluster_MacIsaac_HSF1	6
Cluster_MacIsaac_RPN4	5
