# Supplementary material for: Single-cell RNA sequencing reveals intrinsic and extrinsic regulatory heterogeneity in yeast responding to stress
Source: PLoS Biol. 2017 Dec 14;15(12):e2004050. doi: 10.1371/journal.pbio.2004050 (PMC5746276; doi:10.1371/journal.pbio.2004050)
Supplement: S7 Table — TF, transcription factor. (XLSX) [file pbio.2004050.s007.xlsx]

## Sheet: Clusters scored in this study
Cluster_Harbison_A1 (MATA1)_YPD
Cluster_Harbison_ABF1_YPD				* Two tabs in this file:
Cluster_Harbison_ACA1_YPD				First tab lists all TF gene sets used in this analysis
Cluster_Harbison_ACE2_YPD				Second lab lists all genes in each TF set
Cluster_Harbison_ADR1_HEAT
Cluster_Harbison_ADR1_SM
Cluster_Harbison_ADR1_YPD
Cluster_Harbison_AFT2_H2O2Hi
Cluster_Harbison_AFT2_H2O2Lo
Cluster_Harbison_AFT2_YPD
Cluster_Harbison_ARG80_SM
Cluster_Harbison_ARG80_YPD
Cluster_Harbison_ARG81_SM
Cluster_Harbison_ARG81_YPD
Cluster_Harbison_ARO80_SM
Cluster_Harbison_ARO80_YPD
Cluster_Harbison_ARR1_H2O2Hi
Cluster_Harbison_ARR1_YPD
Cluster_Harbison_ASH1_BUT14
Cluster_Harbison_ASK10_YPD
Cluster_Harbison_AZF1_YPD
Cluster_Harbison_BAS1_SM
Cluster_Harbison_BAS1_YPD
Cluster_Harbison_CAD1_H2O2Hi
Cluster_Harbison_CAD1_SM
Cluster_Harbison_CAD1_YPD
Cluster_Harbison_CBF1_SM
Cluster_Harbison_CBF1_YPD
Cluster_Harbison_CHA4_SM
Cluster_Harbison_CHA4_YPD
Cluster_Harbison_CIN5_H2O2Hi
Cluster_Harbison_CIN5_H2O2Lo
Cluster_Harbison_CIN5_YPD
Cluster_Harbison_CST6_YPD
Cluster_Harbison_CUP9_YPD
Cluster_Harbison_DAL80_RAPA
Cluster_Harbison_DAL80_YPD
Cluster_Harbison_DAL81_RAPA
Cluster_Harbison_DAL81_SM
Cluster_Harbison_DAL81_YPD
Cluster_Harbison_DAL82_RAPA
Cluster_Harbison_DAL82_SM
Cluster_Harbison_DAL82_YPD
Cluster_Harbison_DAT1_YPD
Cluster_Harbison_DIG1_Alpha
Cluster_Harbison_DIG1_BUT14
Cluster_Harbison_DIG1_BUT90
Cluster_Harbison_DIG1_YPD
Cluster_Harbison_EDS1_YPD
Cluster_Harbison_FAP7_YPD
Cluster_Harbison_FHL1_RAPA
Cluster_Harbison_FHL1_SM
Cluster_Harbison_FHL1_YPD
Cluster_Harbison_FKH1_YPD
Cluster_Harbison_FKH2_H2O2Hi
Cluster_Harbison_FKH2_H2O2Lo
Cluster_Harbison_FKH2_YPD
Cluster_Harbison_FZF1_YPD
Cluster_Harbison_GAL3_YPD
Cluster_Harbison_GAL4_GAL
Cluster_Harbison_GAL4_RAFF
Cluster_Harbison_GAL4_YPD
Cluster_Harbison_GAL80_YPD
Cluster_Harbison_GAT1_RAPA
Cluster_Harbison_GAT1_SM
Cluster_Harbison_GAT1_YPD
Cluster_Harbison_GAT3_YPD
Cluster_Harbison_GCN4_RAPA
Cluster_Harbison_GCN4_SM
Cluster_Harbison_GCN4_YPD
Cluster_Harbison_GCR1_YPD
Cluster_Harbison_GCR2_SM
Cluster_Harbison_GCR2_YPD
Cluster_Harbison_GLN3_RAPA
Cluster_Harbison_GLN3_SM
Cluster_Harbison_GLN3_YPD
Cluster_Harbison_GTS1_YPD
Cluster_Harbison_GZF3_H2O2Hi
Cluster_Harbison_GZF3_RAPA
Cluster_Harbison_GZF3_YPD
Cluster_Harbison_HAC1_YPD
Cluster_Harbison_HAL9_YPD
Cluster_Harbison_HAP1_YPD
Cluster_Harbison_HAP2_RAPA
Cluster_Harbison_HAP2_YPD
Cluster_Harbison_HAP3_YPD
Cluster_Harbison_HAP4_H2O2Lo
Cluster_Harbison_HAP4_SM
Cluster_Harbison_HAP4_YPD
Cluster_Harbison_HAP5_SM
Cluster_Harbison_HAP5_YPD
Cluster_Harbison_HIR1_YPD
Cluster_Harbison_HIR2_YPD
Cluster_Harbison_HIR3_YPD
Cluster_Harbison_HMS1_YPD
Cluster_Harbison_HMS2_YPD
Cluster_Harbison_HOG1_YPD
Cluster_Harbison_HSF1_H2O2Hi
Cluster_Harbison_HSF1_H2O2Lo
Cluster_Harbison_HSF1_HEAT
Cluster_Harbison_HSF1_YPD
Cluster_Harbison_IFH1_YPD
Cluster_Harbison_IME1_H2O2Hi
Cluster_Harbison_IME4_H2O2Hi
Cluster_Harbison_IME4_YPD
Cluster_Harbison_INO2_YPD
Cluster_Harbison_INO4_YPD
Cluster_Harbison_IXR1_YPD
Cluster_Harbison_KRE33_YPD
Cluster_Harbison_KSS1_Alpha
Cluster_Harbison_KSS1_BUT90
Cluster_Harbison_KSS1_YPD
Cluster_Harbison_LEU3_SM
Cluster_Harbison_LEU3_YPD
Cluster_Harbison_MAC1_H2O2Hi
Cluster_Harbison_MAC1_YPD
Cluster_Harbison_MAL33_H2O2Hi
Cluster_Harbison_MBF1_YPD
Cluster_Harbison_MBP1_H2O2Hi
Cluster_Harbison_MBP1_H2O2Lo
Cluster_Harbison_MBP1_YPD
Cluster_Harbison_MCM1_Alpha
Cluster_Harbison_MCM1_YPD
Cluster_Harbison_MDS3_YPD
Cluster_Harbison_MET18_YPD
Cluster_Harbison_MET28_YPD
Cluster_Harbison_MET31_SM
Cluster_Harbison_MET31_YPD
Cluster_Harbison_MET32_SM
Cluster_Harbison_MET32_YPD
Cluster_Harbison_MET4_SM
Cluster_Harbison_MET4_YPD
Cluster_Harbison_MGA1_H2O2Hi
Cluster_Harbison_MGA1_YPD
Cluster_Harbison_MIG1_YPD
Cluster_Harbison_MIG2_H2O2Hi
Cluster_Harbison_MIG2_YPD
Cluster_Harbison_MIG3_YPD
Cluster_Harbison_MOT3_H2O2Hi
Cluster_Harbison_MOT3_H2O2Lo
Cluster_Harbison_MOT3_SM
Cluster_Harbison_MOT3_YPD
Cluster_Harbison_MSN1_YPD
Cluster_Harbison_MSN2_Acid
Cluster_Harbison_MSN2_H2O2Hi
Cluster_Harbison_MSN2_H2O2Lo
Cluster_Harbison_MSN2_RAPA
Cluster_Harbison_MSN2_YPD
Cluster_Harbison_MSN4_Acid
Cluster_Harbison_MSN4_H2O2Hi
Cluster_Harbison_MSN4_H2O2Lo
Cluster_Harbison_MSN4_RAPA
Cluster_Harbison_MSN4_YPD
Cluster_Harbison_MSS11_BUT14
Cluster_Harbison_MTH1_GAL
Cluster_Harbison_MTH1_YPD
Cluster_Harbison_NDD1_YPD
Cluster_Harbison_NDT80_YPD
Cluster_Harbison_NRG1_H2O2Hi
Cluster_Harbison_NRG1_H2O2Lo
Cluster_Harbison_NRG1_YPD
Cluster_Harbison_OAF1_YPD
Cluster_Harbison_OPI1_YPD
Cluster_Harbison_PDC2_YPD
Cluster_Harbison_PDR1_H2O2Lo
Cluster_Harbison_PDR1_YPD
Cluster_Harbison_PDR3_YPD
Cluster_Harbison_PHD1_BUT90
Cluster_Harbison_PHD1_YPD
Cluster_Harbison_PHO2_H2O2Hi
Cluster_Harbison_PHO2_H2O2Lo
Cluster_Harbison_PHO2_Pi-
Cluster_Harbison_PHO2_SM
Cluster_Harbison_PHO2_YPD
Cluster_Harbison_PHO4_Pi-
Cluster_Harbison_PHO4_YPD
Cluster_Harbison_PIP2_YPD
Cluster_Harbison_PPR1_YPD
Cluster_Harbison_PUT3_H2O2Lo
Cluster_Harbison_PUT3_SM
Cluster_Harbison_PUT3_YPD
Cluster_Harbison_RAP1_YPD
Cluster_Harbison_RCO1_YPD
Cluster_Harbison_RCS1_H2O2Hi
Cluster_Harbison_RCS1_H2O2Lo
Cluster_Harbison_RCS1_SM
Cluster_Harbison_RCS1_YPD
Cluster_Harbison_RDR1_YPD
Cluster_Harbison_RDS1_H2O2Hi
Cluster_Harbison_RDS1_YPD
Cluster_Harbison_REB1_H2O2Hi
Cluster_Harbison_REB1_YPD
Cluster_Harbison_RFX1_YPD
Cluster_Harbison_RGM1_YPD
Cluster_Harbison_RGT1_YPD
Cluster_Harbison_RIM101_H2O2Hi
Cluster_Harbison_RIM101_H2O2Lo
Cluster_Harbison_RIM101_YPD
Cluster_Harbison_RLM1_YPD
Cluster_Harbison_RLR1_YPD
Cluster_Harbison_RME1_YPD
Cluster_Harbison_ROX1_H2O2Hi
Cluster_Harbison_ROX1_H2O2Lo
Cluster_Harbison_ROX1_YPD
Cluster_Harbison_RPH1_H2O2Hi
Cluster_Harbison_RPH1_H2O2Lo
Cluster_Harbison_RPH1_SM
Cluster_Harbison_RPH1_YPD
Cluster_Harbison_RPN4 _H2O2Hi
Cluster_Harbison_RPN4_H2O2Lo
Cluster_Harbison_RPN4_YPD
Cluster_Harbison_RTG1_RAPA
Cluster_Harbison_RTG1_SM
Cluster_Harbison_RTG1_YPD
Cluster_Harbison_RTG3_H2O2Hi
Cluster_Harbison_RTG3_H2O2Lo
Cluster_Harbison_RTG3_RAPA
Cluster_Harbison_RTG3_SM
Cluster_Harbison_RTG3_YPD
Cluster_Harbison_SFP1_H2O2Hi
Cluster_Harbison_SFP1_H2O2Lo
Cluster_Harbison_SFP1_SM
Cluster_Harbison_SFP1_YPD
Cluster_Harbison_SIG1_H2O2Hi
Cluster_Harbison_SIP4_SM
Cluster_Harbison_SIP4_YPD
Cluster_Harbison_SKN7_H2O2Hi
Cluster_Harbison_SKN7_H2O2Lo
Cluster_Harbison_SKN7_HEAT
Cluster_Harbison_SKN7_YPD
Cluster_Harbison_SKO1_YPD
Cluster_Harbison_SMK1_YPD
Cluster_Harbison_SMP1_YPD
Cluster_Harbison_SNF1_YPD
Cluster_Harbison_SNT2_YPD
Cluster_Harbison_SOK2_BUT14
Cluster_Harbison_SPT2_YPD
Cluster_Harbison_SPT23_YPD
Cluster_Harbison_SRD1_YPD
Cluster_Harbison_STB1_YPD
Cluster_Harbison_STB2_YPD
Cluster_Harbison_STB4_YPD
Cluster_Harbison_STB5_YPD
Cluster_Harbison_STE12_Alpha
Cluster_Harbison_STE12_BUT14
Cluster_Harbison_STE12_BUT90
Cluster_Harbison_STE12_YPD
Cluster_Harbison_STP1_SM
Cluster_Harbison_STP1_YPD
Cluster_Harbison_STP2_YPD
Cluster_Harbison_STP4_YPD
Cluster_Harbison_SUM1_YPD
Cluster_Harbison_SUT1_YPD
Cluster_Harbison_SWI4_YPD
Cluster_Harbison_SWI5_YPD
Cluster_Harbison_SWI6_YPD
Cluster_Harbison_TEC1_Alpha
Cluster_Harbison_TEC1_BUT14
Cluster_Harbison_TEC1_YPD
Cluster_Harbison_THI2_Thi-
Cluster_Harbison_THI2_YPD
Cluster_Harbison_TYE7_YPD
Cluster_Harbison_UGA3_RAPA
Cluster_Harbison_UGA3_SM
Cluster_Harbison_UGA3_YPD
Cluster_Harbison_UME1_H2O2Hi
Cluster_Harbison_UME1_YPD
Cluster_Harbison_UME6_H2O2Hi
Cluster_Harbison_UME6_YPD
Cluster_Harbison_UPC2_YPD
Cluster_Harbison_USV1_YPD
Cluster_Harbison_WAR1_YPD
Cluster_Harbison_WTM1_YPD
Cluster_Harbison_XBP1_H2O2Lo
Cluster_Harbison_YAP1_H2O2Hi
Cluster_Harbison_YAP1_H2O2Lo
Cluster_Harbison_YAP1_YPD
Cluster_Harbison_YAP3_YPD
Cluster_Harbison_YAP5_H2O2Hi
Cluster_Harbison_YAP5_YPD
Cluster_Harbison_YAP6_H2O2Hi
Cluster_Harbison_YAP6_H2O2Lo
Cluster_Harbison_YAP6_YPD
Cluster_Harbison_YAP7_H2O2Hi
Cluster_Harbison_YAP7_H2O2Lo
Cluster_Harbison_YAP7_YPD
Cluster_Harbison_YBL054W_YPD
Cluster_Harbison_YDR026c_YPD
Cluster_Harbison_YDR049W_YPD
Cluster_Harbison_YDR266c_YPD
Cluster_Harbison_YDR520C_YPD
Cluster_Harbison_YER051w_YPD
Cluster_Harbison_YER130C_YPD
Cluster_Harbison_YER184C_YPD
Cluster_Harbison_YFL044C_YPD
Cluster_Harbison_YFL052w_YPD
Cluster_Harbison_YHP1_YPD
Cluster_Harbison_YJL206C_H2O2Hi
Cluster_Harbison_YJL206C_H2O2Lo
Cluster_Harbison_YJL206C_YPD
Cluster_Harbison_YKR064W_YPD
Cluster_Harbison_YML081W_YPD
Cluster_Harbison_YOX1_YPD
Cluster_Harbison_YRR1_YPD
Cluster_Harbison_ZAP1_YPD
Cluster_Harbison_ZMS1_YPD
Cluster_HoseDot6Tod6_2obs1.5XrepDefect
Cluster_Huebert-Msn2_Chip-InducedDefective
Cluster_MacIsaac_ABF1
Cluster_MacIsaac_ACE2
Cluster_MacIsaac_ADR1
Cluster_MacIsaac_AFT1
Cluster_MacIsaac_AFT2
Cluster_MacIsaac_ARG80
Cluster_MacIsaac_ARG81
Cluster_MacIsaac_ARO80
Cluster_MacIsaac_ARR1
Cluster_MacIsaac_ASH1
Cluster_MacIsaac_AZF1
Cluster_MacIsaac_BAS1
Cluster_MacIsaac_CAD1
Cluster_MacIsaac_CBF1
Cluster_MacIsaac_CHA4
Cluster_MacIsaac_CIN5
Cluster_MacIsaac_CST6
Cluster_MacIsaac_DAL80
Cluster_MacIsaac_DAL81
Cluster_MacIsaac_DAL82
Cluster_MacIsaac_DIG1
Cluster_MacIsaac_FHL1
Cluster_MacIsaac_FKH1
Cluster_MacIsaac_FKH2
Cluster_MacIsaac_GAL4
Cluster_MacIsaac_GAL80
Cluster_MacIsaac_GAT1
Cluster_MacIsaac_GAT3
Cluster_MacIsaac_GCN4
Cluster_MacIsaac_GCR1
Cluster_MacIsaac_GCR2
Cluster_MacIsaac_GLN3
Cluster_MacIsaac_GTS1
Cluster_MacIsaac_GZF3
Cluster_MacIsaac_HAC1
Cluster_MacIsaac_HAP1
Cluster_MacIsaac_HAP2
Cluster_MacIsaac_HAP3
Cluster_MacIsaac_HAP4
Cluster_MacIsaac_HAP5
Cluster_MacIsaac_HSF1
Cluster_MacIsaac_IME1
Cluster_MacIsaac_INO2
Cluster_MacIsaac_INO4
Cluster_MacIsaac_IXR1
Cluster_MacIsaac_LEU3
Cluster_MacIsaac_MAC1
Cluster_MacIsaac_MATA1
Cluster_MacIsaac_MBP1
Cluster_MacIsaac_MCM1
Cluster_MacIsaac_MET31
Cluster_MacIsaac_MET32
Cluster_MacIsaac_MET4
Cluster_MacIsaac_MIG1
Cluster_MacIsaac_MOT3
Cluster_MacIsaac_MSN2
Cluster_MacIsaac_MSN4
Cluster_MacIsaac_NDD1
Cluster_MacIsaac_NRG1
Cluster_MacIsaac_OPI1
Cluster_MacIsaac_PDR1
Cluster_MacIsaac_PDR3
Cluster_MacIsaac_PHD1
Cluster_MacIsaac_PHO2
Cluster_MacIsaac_PHO4
Cluster_MacIsaac_PUT3
Cluster_MacIsaac_RAP1
Cluster_MacIsaac_RDS1
Cluster_MacIsaac_REB1
Cluster_MacIsaac_RFX1
Cluster_MacIsaac_RGT1
Cluster_MacIsaac_RIM101
Cluster_MacIsaac_RLM1
Cluster_MacIsaac_RME1
Cluster_MacIsaac_ROX1
Cluster_MacIsaac_RPH1
Cluster_MacIsaac_RPN4
Cluster_MacIsaac_RTG3
Cluster_MacIsaac_SFP1
Cluster_MacIsaac_SIP4
Cluster_MacIsaac_SKN7
Cluster_MacIsaac_SKO1
Cluster_MacIsaac_SMP1
Cluster_MacIsaac_SNT2
Cluster_MacIsaac_SOK2
Cluster_MacIsaac_SPT2
Cluster_MacIsaac_SPT23
Cluster_MacIsaac_STB1
Cluster_MacIsaac_STB2
Cluster_MacIsaac_STB4
Cluster_MacIsaac_STB5
Cluster_MacIsaac_STE12
Cluster_MacIsaac_STP1
Cluster_MacIsaac_STP4
Cluster_MacIsaac_SUM1
Cluster_MacIsaac_SUT1
Cluster_MacIsaac_SWI4
Cluster_MacIsaac_SWI5
Cluster_MacIsaac_SWI6
Cluster_MacIsaac_TDA9
Cluster_MacIsaac_TEC1
Cluster_MacIsaac_THI2
Cluster_MacIsaac_THO2
Cluster_MacIsaac_TYE7
Cluster_MacIsaac_UGA3
Cluster_MacIsaac_UME6
Cluster_MacIsaac_URC2
Cluster_MacIsaac_XBP1
Cluster_MacIsaac_YAP1
Cluster_MacIsaac_YAP5
Cluster_MacIsaac_YAP6
Cluster_MacIsaac_YAP7
Cluster_MacIsaac_YHP1
Cluster_MacIsaac_YOX1
Cluster_MacIsaac_YRR1
Cluster_MacIsaac_ZAP1
Cluster_Venters25-37C_Ash1
Cluster_Venters25-37C_Bas1
Cluster_Venters25-37C_Cha4
Cluster_Venters25-37C_Chd1
Cluster_Venters25-37C_Cin5
Cluster_Venters25-37C_Dig1
Cluster_Venters25-37C_Dot1
Cluster_Venters25-37C_Fhl1
Cluster_Venters25-37C_Fkh1
Cluster_Venters25-37C_Fkh2
Cluster_Venters25-37C_Gal4
Cluster_Venters25-37C_Gcn4
Cluster_Venters25-37C_Gcr1
Cluster_Venters25-37C_Gln3
Cluster_Venters25-37C_Ifh1
Cluster_Venters25-37C_Ino2
Cluster_Venters25-37C_Ino4
Cluster_Venters25-37C_Ino80
Cluster_Venters25-37C_Mot1
Cluster_Venters25-37C_Msn2
Cluster_Venters25-37C_Put3
Cluster_Venters25-37C_Rtg2
Cluster_Venters25-37C_Sfp1
Cluster_Venters25-37C_Skn7
Cluster_Venters25-37C_Snf1
Cluster_Venters25-37C_Ste12
Cluster_Venters25-37C_Stp1
Cluster_Venters25-37C_Swi4
Cluster_Venters25-37C_Swi5
Cluster_Venters25-37C_Xbp1
Cluster_Venters25-37C_Yaf9
Cluster_Venters25-37C_Yap1
Cluster_Venters25-37C_Yap5
Cluster_Venters25-37C_Yap6
Cluster_Venters25-37C_Zap1
Cluster_Venters25-37C_Zms1
Cluster_YeasTractDirect_ABF1
Cluster_YeasTractDirect_ACA1
Cluster_YeasTractDirect_ACE2
Cluster_YeasTractDirect_ADR1
Cluster_YeasTractDirect_AFT1
Cluster_YeasTractDirect_AFT2
Cluster_YeasTractDirect_ARG80
Cluster_YeasTractDirect_ARG81
Cluster_YeasTractDirect_ARO80
Cluster_YeasTractDirect_ARR1
Cluster_YeasTractDirect_ASF1
Cluster_YeasTractDirect_ASH1
Cluster_YeasTractDirect_AZF1
Cluster_YeasTractDirect_BAS1
Cluster_YeasTractDirect_CAD1
Cluster_YeasTractDirect_CAT8
Cluster_YeasTractDirect_CBF1
Cluster_YeasTractDirect_CHA4
Cluster_YeasTractDirect_CIN5
Cluster_YeasTractDirect_CRZ1
Cluster_YeasTractDirect_CST6
Cluster_YeasTractDirect_CUP2
Cluster_YeasTractDirect_CUP9
Cluster_YeasTractDirect_DAL80
Cluster_YeasTractDirect_DAL81
Cluster_YeasTractDirect_DAL82
Cluster_YeasTractDirect_DIG1
Cluster_YeasTractDirect_ECM22
Cluster_YeasTractDirect_ELP6
Cluster_YeasTractDirect_FHL1
Cluster_YeasTractDirect_FKH1
Cluster_YeasTractDirect_FKH2
Cluster_YeasTractDirect_FLO8
Cluster_YeasTractDirect_FZF1
Cluster_YeasTractDirect_GAL4
Cluster_YeasTractDirect_GAL80
Cluster_YeasTractDirect_GAT1
Cluster_YeasTractDirect_GAT3
Cluster_YeasTractDirect_GCN4
Cluster_YeasTractDirect_GCR1
Cluster_YeasTractDirect_GCR2
Cluster_YeasTractDirect_GIS1
Cluster_YeasTractDirect_GLN3
Cluster_YeasTractDirect_GSM1
Cluster_YeasTractDirect_GTS1
Cluster_YeasTractDirect_GZF3
Cluster_YeasTractDirect_HAA1
Cluster_YeasTractDirect_HAC1
Cluster_YeasTractDirect_HAL9
Cluster_YeasTractDirect_HAP1
Cluster_YeasTractDirect_HAP2
Cluster_YeasTractDirect_HAP3
Cluster_YeasTractDirect_HAP4
Cluster_YeasTractDirect_HAP5
Cluster_YeasTractDirect_HCM1
Cluster_YeasTractDirect_HIR1
Cluster_YeasTractDirect_HIR2
Cluster_YeasTractDirect_HMO1
Cluster_YeasTractDirect_HMS1
Cluster_YeasTractDirect_HMS2
Cluster_YeasTractDirect_HOT1
Cluster_YeasTractDirect_HSF1
Cluster_YeasTractDirect_IFH1
Cluster_YeasTractDirect_IME1
Cluster_YeasTractDirect_INO2
Cluster_YeasTractDirect_INO4
Cluster_YeasTractDirect_IXR1
Cluster_YeasTractDirect_KAR4
Cluster_YeasTractDirect_LEU3
Cluster_YeasTractDirect_MAC1
Cluster_YeasTractDirect_MAL13
Cluster_YeasTractDirect_MAL33
Cluster_YeasTractDirect_MBP1
Cluster_YeasTractDirect_MCM1
Cluster_YeasTractDirect_MDL2
Cluster_YeasTractDirect_MET28
Cluster_YeasTractDirect_MET31
Cluster_YeasTractDirect_MET32
Cluster_YeasTractDirect_MET4
Cluster_YeasTractDirect_MGA1
Cluster_YeasTractDirect_MGA2
Cluster_YeasTractDirect_MIG1
Cluster_YeasTractDirect_MIG2
Cluster_YeasTractDirect_MIG3
Cluster_YeasTractDirect_MOT2
Cluster_YeasTractDirect_MOT3
Cluster_YeasTractDirect_MSN1
Cluster_YeasTractDirect_MSN2
Cluster_YeasTractDirect_MSN4
Cluster_YeasTractDirect_MSS11
Cluster_YeasTractDirect_NDD1
Cluster_YeasTractDirect_NDT80
Cluster_YeasTractDirect_NRG1
Cluster_YeasTractDirect_OAF1
Cluster_YeasTractDirect_OPI1
Cluster_YeasTractDirect_OTU1
Cluster_YeasTractDirect_PDC2
Cluster_YeasTractDirect_PDR1
Cluster_YeasTractDirect_PDR3
Cluster_YeasTractDirect_PDR8
Cluster_YeasTractDirect_PHD1
Cluster_YeasTractDirect_PHO2
Cluster_YeasTractDirect_PHO4
Cluster_YeasTractDirect_PIP2
Cluster_YeasTractDirect_PPR1
Cluster_YeasTractDirect_PUT3
Cluster_YeasTractDirect_RAP1
Cluster_YeasTractDirect_RDR1
Cluster_YeasTractDirect_RDS1
Cluster_YeasTractDirect_RDS2
Cluster_YeasTractDirect_REB1
Cluster_YeasTractDirect_RFX1
Cluster_YeasTractDirect_RGM1
Cluster_YeasTractDirect_RGT1
Cluster_YeasTractDirect_RIM101
Cluster_YeasTractDirect_RLM1
Cluster_YeasTractDirect_RME1
Cluster_YeasTractDirect_ROX1
Cluster_YeasTractDirect_RPH1
Cluster_YeasTractDirect_RPN4
Cluster_YeasTractDirect_RSF2
Cluster_YeasTractDirect_RTG1
Cluster_YeasTractDirect_RTG2
Cluster_YeasTractDirect_RTG3
Cluster_YeasTractDirect_RTS2
Cluster_YeasTractDirect_SFL1
Cluster_YeasTractDirect_SFP1
Cluster_YeasTractDirect_SIP4
Cluster_YeasTractDirect_SKN7
Cluster_YeasTractDirect_SKO1
Cluster_YeasTractDirect_SMP1
Cluster_YeasTractDirect_SOK2
Cluster_YeasTractDirect_SPT23
Cluster_YeasTractDirect_SRD1
Cluster_YeasTractDirect_STB1
Cluster_YeasTractDirect_STB5
Cluster_YeasTractDirect_STE12
Cluster_YeasTractDirect_STP1
Cluster_YeasTractDirect_STP2
Cluster_YeasTractDirect_SUM1
Cluster_YeasTractDirect_SWI4
Cluster_YeasTractDirect_SWI5
Cluster_YeasTractDirect_SWI6
Cluster_YeasTractDirect_TEC1
Cluster_YeasTractDirect_THI2
Cluster_YeasTractDirect_TOS8
Cluster_YeasTractDirect_TYE7
Cluster_YeasTractDirect_UGA3
Cluster_YeasTractDirect_UME6
Cluster_YeasTractDirect_UPC2
Cluster_YeasTractDirect_USV1
Cluster_YeasTractDirect_WAR1
Cluster_YeasTractDirect_XBP1
Cluster_YeasTractDirect_YAP1
Cluster_YeasTractDirect_YAP3
Cluster_YeasTractDirect_YAP5
Cluster_YeasTractDirect_YAP6
Cluster_YeasTractDirect_YAP7
Cluster_YeasTractDirect_YHP1
Cluster_YeasTractDirect_YOX1
Cluster_YeasTractDirect_YRM1
Cluster_YeasTractDirect_YRR1
Cluster_YeasTractDirect_ZAP1

## Sheet: Table7_Mega_TF-RBPs_targets.txt
Cluster_MacIsaac_ABF1
YHR199C	ABF1
YMR092C	ABF1
YBR110W	ABF1
YBR211C	ABF1
YPR128C	ABF1
YKL135C	ABF1
YMR033W	ABF1
YDR384C	ABF1
YKL016C	ABF1
YDR361C	ABF1
YIL033C	ABF1
YPR176C	ABF1
YOL077C	ABF1
YJL111W	ABF1
YAL041W	ABF1
YBR029C	ABF1
YLR330W	ABF1
YMR198W	ABF1
YBR109C	ABF1
YKL190W	ABF1
YDL145C	ABF1
YHR116W	ABF1
YIR023W	ABF1
YNR038W	ABF1
YKL078W	ABF1
YHR115C	ABF1
YIR010W	ABF1
YPR017C	ABF1
YKL172W	ABF1
YBR078W	ABF1
YGL222C	ABF1
YDR385W	ABF1
YFL048C	ABF1
YNL313C	ABF1
YGR254W	ABF1
YAL042W	ABF1
YKL060C	ABF1
YDR339C	ABF1
YBR101C	ABF1
YPR104C	ABF1
YJR093C	ABF1
YAL053W	ABF1
YIL134W	ABF1
YCL011C	ABF1
YGL195W	ABF1
YDR283C	ABF1
YOR205C	ABF1
YNL255C	ABF1
YKR030W	ABF1
YDL035C	ABF1
YLR293C	ABF1
YDR454C	ABF1
YDR295C	ABF1
YGL194C	ABF1
YOL068C	ABF1
YGR268C	ABF1
YNL037C	ABF1
YGL192W	ABF1
YJR138W	ABF1
YLR095C	ABF1
YPL242C	ABF1
YLR096W	ABF1
YNL322C	ABF1
YJL174W	ABF1
YJL062W	ABF1
YMR296C	ABF1
YFL018C	ABF1
YKL143W	ABF1
YDR234W	ABF1
YKL029C	ABF1
YNL307C	ABF1
YOL076W	ABF1
YJR137C	ABF1
YDR296W	ABF1
YKL195W	ABF1
YNL085W	ABF1
YGL106W	ABF1
YDR245W	ABF1
YJL183W	ABF1
YHR162W	ABF1
YDR405W	ABF1
YBL038W	ABF1
YJL063C	ABF1
YNR036C	ABF1
YPL013C	ABF1
YNL306W	ABF1
YOL116W	ABF1
YDR194C	ABF1
YGR232W	ABF1
YNL036W	ABF1
YIL048W	ABF1
YBR212W	ABF1
YDR456W	ABF1
YHR077C	ABF1
YOR056C	ABF1
YOR206W	ABF1
YOR310C	ABF1
YNL183C	ABF1
YDL105W	ABF1
YJR062C	ABF1
YBL079W	ABF1
YDL116W	ABF1
YDL193W	ABF1
YHL029C	ABF1
YBR129C	ABF1
YBL080C	ABF1
YPL159C	ABF1
YGR231C	ABF1
YDL106C	ABF1
YNL267W	ABF1
YAL023C	ABF1
YMR129W	ABF1
YMR297W	ABF1
YPR178W	ABF1
YAL043C	ABF1
YGR253C	ABF1
YKL015W	ABF1
YEL037C	ABF1
YDR195W	ABF1
YDR028C	ABF1
YNL312W	ABF1
YFL047W	ABF1
YBR030W	ABF1
YPR018W	ABF1
YGL107C	ABF1
YMR061W	ABF1
YMR200W	ABF1
YJR063W	ABF1
YDR404C	ABF1
YKL144C	ABF1
YHR200W	ABF1
YOR261C	ABF1
YOR116C	ABF1
YOR117W	ABF1
YNL213C	ABF1
YPL012W	ABF1
YCL031C	ABF1
YGR056W	ABF1
YNR037C	ABF1
YDR233C	ABF1
YMR060C	ABF1
YPR129W	ABF1
YBR080C	ABF1
YNL287W	ABF1
YKR029C	ABF1
YOR057W	ABF1
YDR422C	ABF1
YBL007C	ABF1
YNL243W	ABF1
YBR077C	ABF1
YLR025W	ABF1
snR14	ABF1
snR55	ABF1
snR57	ABF1
snR61	ABF1
snR68	ABF1
YGR059W	ABF1
YNL189W	ABF1
YDR312W	ABF1
YBR283C	ABF1
YHR064C	ABF1
YNL244C	ABF1
YJL176C	ABF1
YGR129W	ABF1
YMR005W	ABF1
YJR116W	ABF1
YML081W	ABF1
YKL028W	ABF1
YGR186W	ABF1
YCR053W	ABF1
YMR260C	ABF1
YOR045W	ABF1
YGR185C	ABF1
YDL122W	ABF1
YLR024C	ABF1
YIL031W	ABF1
YBL039C	ABF1
YKL014C	ABF1
YLR222C	ABF1
YMR093W	ABF1
YGR128C	ABF1
YIL135C	ABF1
YNL212W	ABF1
YNL321W	ABF1
YLR396C	ABF1
YMR197C	ABF1
YHL028W	ABF1
YHR161C	ABF1
YBR284W	ABF1
YDL130WA	ABF1
YDR194WA	ABF1
YDR363WA	ABF1
YFL017WA	ABF1
YHR078W	ABF1
YIL134CA	ABF1
YJL062WA	ABF1
YKL196C	ABF1
YML081CA	ABF1
YHR090C	ABF1
YOL036W	ABF1
YOR262W	ABF1
YDR326C	ABF1
YGR270W	ABF1
Cluster_MacIsaac_ACE2
YBR158W	ACE2
YER177W	ACE2
YGR041W	ACE2
YDR155C	ACE2
YLR286C	ACE2
YML101C	ACE2
YER124C	ACE2
YNL327W	ACE2
YJR147W	ACE2
YJL159W	ACE2
YBR157C	ACE2
YBR159W	ACE2
YGL133W	ACE2
YKL150W	ACE2
YNL328C	ACE2
YNL078W	ACE2
YHL029C	ACE2
YDL127W	ACE2
YGL008C	ACE2
YGL006W	ACE2
YDR527W	ACE2
YNR018W	ACE2
YDR156W	ACE2
YJR145C	ACE2
YER125W	ACE2
YOR138C	ACE2
YGL229C	ACE2
YGL028C	ACE2
YOR140W	ACE2
YGL228W	ACE2
YNL079C	ACE2
YML100W	ACE2
YJR044C	ACE2
YHL028W	ACE2
YDR524CB	ACE2
YDR524WA	ACE2
YDR525WA	ACE2
YGL006WA	ACE2
YGL007CA	ACE2
YGR283C	ACE2
YJL160C	ACE2
YKL151C	ACE2
YML100WA	ACE2
YNL241C	ACE2
Cluster_MacIsaac_ADR1
YIL146C	ADR1
YKL016C	ADR1
YDL117W	ADR1
YAL022C	ADR1
YER133W	ADR1
YJR140C	ADR1
YPL148C	ADR1
YKL015W	ADR1
YPL147W	ADR1
snR52	ADR1
tTUGUP	ADR1
YNR006W	ADR1
YDL119C	ADR1
YJR141W	ADR1
YPR108WA	ADR1
YPR109W	ADR1
Cluster_MacIsaac_AFT1
YNL270C	AFT1
YKL103C	AFT1
YNL259C	AFT1
YDR270W	AFT1
YGR108W	AFT1
YOR316C	AFT1
YPR124W	AFT1
YLR206W	AFT1
YOR317W	AFT1
YNR060W	AFT1
YBR207W	AFT1
YER145C	AFT1
YPL137C	AFT1
YGL181W	AFT1
YLR205C	AFT1
YKL101W	AFT1
YCR021C	AFT1
YPL135W	AFT1
YGR238C	AFT1
YER146W	AFT1
YKL176C	AFT1
YNL268W	AFT1
YMR177W	AFT1
YGL183C	AFT1
YKR052C	AFT1
YGR257C	AFT1
YGL055W	AFT1
YEL060C	AFT1
YPL156C	AFT1
YHR200W	AFT1
YGL056C	AFT1
YEL065W	AFT1
YMR016C	AFT1
YMR017W	AFT1
YPR151C	AFT1
tKUUUG2	AFT1
YHL035C	AFT1
YNL260C	AFT1
YOR316CA	AFT1
YKL175W	AFT1
YNL241C	AFT1
Cluster_MacIsaac_AFT2
YBR132C	AFT2
YNL270C	AFT2
YKL103C	AFT2
YDR441C	AFT2
YNL259C	AFT2
YER177W	AFT2
YDR270W	AFT2
YPR119W	AFT2
YOR316C	AFT2
YDR151C	AFT2
YBR078W	AFT2
YLR206W	AFT2
YOR317W	AFT2
YFL041W	AFT2
YGR131W	AFT2
YBR207W	AFT2
YER145C	AFT2
YPL137C	AFT2
YDR152W	AFT2
YGL181W	AFT2
YOR227W	AFT2
YLR205C	AFT2
YKL101W	AFT2
YMR035W	AFT2
YPL135W	AFT2
YOR226C	AFT2
YDR475C	AFT2
YER146W	AFT2
YNL268W	AFT2
YBR297W	AFT2
YMR177W	AFT2
YGL183C	AFT2
YKR052C	AFT2
YDL154W	AFT2
YGL055W	AFT2
YBR296C	AFT2
YJR006W	AFT2
YEL060C	AFT2
YNL090W	AFT2
YMR266W	AFT2
YGL056C	AFT2
YBR077C	AFT2
YLR034C	AFT2
YPR151C	AFT2
tKUUUP	AFT2
YBR296CA	AFT2
YFL041WA	AFT2
YFL042C	AFT2
YGR130C	AFT2
YJR005CA	AFT2
YMR034C	AFT2
YMR265C	AFT2
YMR279C	AFT2
YNL193W	AFT2
YNL194C	AFT2
YNL260C	AFT2
YOR316CA	AFT2
YPL034W	AFT2
YLR120C	AFT2
YNL241C	AFT2
Cluster_MacIsaac_ARG80
YER069W	ARG80
YOL140W	ARG80
YFL023W	ARG80
YER048C	ARG80
YPL177C	ARG80
YMR031C	ARG80
YFL024C	ARG80
YDR434W	ARG80
YMR032W	ARG80
YDR452W	ARG80
tQUUGE1	ARG80
YDR451C	ARG80
YNL050C	ARG80
Cluster_MacIsaac_ARG81
YJL088W	ARG81
YER069W	ARG81
YOL140W	ARG81
YFL023W	ARG81
YFL024C	ARG81
YML098W	ARG81
Cluster_MacIsaac_ARO80
YHR136C	ARO80
Cluster_MacIsaac_ARR1
YBR040W	ARR1
YKL001C	ARR1
YHR195W	ARR1
YAL017W	ARR1
YOR001W	ARR1
YLR022C	ARR1
YCL054W	ARR1
YJR044C	ARR1
YAL018C	ARR1
YMR087W	ARR1
Cluster_MacIsaac_ASH1
YDR054C	ASH1
YJL194W	ASH1
YGR189C	ASH1
YOL007C	ASH1
YJL196C	ASH1
YLR300W	ASH1
YMR306W	ASH1
YNL289W	ASH1
YMR123W	ASH1
YIL122W	ASH1
YDR452W	ASH1
YDR055W	ASH1
YDR527W	ASH1
YMR121C	ASH1
YMR305C	ASH1
YDR077W	ASH1
YOL113W	ASH1
tAAGCK2	ASH1
YKR042W	ASH1
YDR524CB	ASH1
YDR524WA	ASH1
YDR525WA	ASH1
YDR451C	ASH1
YKR041W	ASH1
YMR122WA	ASH1
YOL114C	ASH1
Cluster_MacIsaac_AZF1
Cluster_MacIsaac_BAS1
YMR120C	BAS1
YOR128C	BAS1
YGR204W	BAS1
YMR300C	BAS1
YGL234W	BAS1
YGR061C	BAS1
YDR408C	BAS1
YAL060W	BAS1
YLR060W	BAS1
YMR189W	BAS1
YAL044C	BAS1
YCL030C	BAS1
YOR267C	BAS1
YMR186W	BAS1
YER092W	BAS1
YKL217W	BAS1
YER091C	BAS1
YLR057W	BAS1
YMR188C	BAS1
YKR080W	BAS1
YGL236C	BAS1
YOR269W	BAS1
YLR059C	BAS1
YLR058C	BAS1
YDR409W	BAS1
YKL218C	BAS1
YGL184C	BAS1
YGL186C	BAS1
YKR079C	BAS1
YMR244W	BAS1
YMR243C	BAS1
Cluster_MacIsaac_CAD1
YMR038C	CAD1
YKL087C	CAD1
YKR071C	CAD1
YJL101C	CAD1
YBL008W	CAD1
YKL101W	CAD1
YJL100W	CAD1
YKR052C	CAD1
YKL040C	CAD1
YGR233C	CAD1
YKL039W	CAD1
YKL086W	CAD1
YPR048W	CAD1
YBL008WA	CAD1
YGR234W	CAD1
Cluster_MacIsaac_CBF1
YKL192C	CBF1
YAL054C	CBF1
YNL220W	CBF1
YGR204W	CBF1
YDR530C	CBF1
YHR113W	CBF1
YNL094W	CBF1
YBR249C	CBF1
YHR137W	CBF1
YMR301C	CBF1
YBR039W	CBF1
YKL016C	CBF1
YIL088C	CBF1
YGR224W	CBF1
YIL033C	CBF1
YER177W	CBF1
YER114C	CBF1
YNR051C	CBF1
YFL023W	CBF1
YOR299W	CBF1
YDR531W	CBF1
YKL007W	CBF1
YJL209W	CBF1
YDR054C	CBF1
YCR093W	CBF1
YMR198W	CBF1
YNL232W	CBF1
YAL012W	CBF1
YOR065W	CBF1
YDR141C	CBF1
YKL191W	CBF1
YAL026C	CBF1
YER124C	CBF1
YGR200C	CBF1
YPL236C	CBF1
YFL024C	CBF1
YJL167W	CBF1
YGR060W	CBF1
YAL053W	CBF1
YGR052W	CBF1
YHR089C	CBF1
YJL101C	CBF1
YML121W	CBF1
YMR217W	CBF1
YPL254W	CBF1
YJR147W	CBF1
YPL204W	CBF1
YDR191W	CBF1
YGR223C	CBF1
YPL250C	CBF1
YNL037C	CBF1
YER092W	CBF1
YJR138W	CBF1
YOL101C	CBF1
YHR082C	CBF1
YOR099W	CBF1
YKL008C	CBF1
YNL104C	CBF1
YFL018C	CBF1
YJL100W	CBF1
YER112W	CBF1
YFR030W	CBF1
YOL064C	CBF1
YIR017C	CBF1
YNL277W	CBF1
YJR010W	CBF1
YNL103W	CBF1
YJR137C	CBF1
YER091C	CBF1
YJL186W	CBF1
YJL133W	CBF1
YCR092C	CBF1
YNL063W	CBF1
YNL036W	CBF1
YHR042W	CBF1
YML120C	CBF1
YOR098C	CBF1
YGL055W	CBF1
YIR006C	CBF1
YOR328W	CBF1
YOL136C	CBF1
YPL206C	CBF1
YGR233C	CBF1
YML123C	CBF1
YJL117W	CBF1
YNR013C	CBF1
YOL100W	CBF1
YNL221C	CBF1
YNL282W	CBF1
YPR103W	CBF1
YER099C	CBF1
YAL017W	CBF1
YML017W	CBF1
YLL010C	CBF1
YDR055W	CBF1
YDL006W	CBF1
YER094C	CBF1
YKL015W	CBF1
YJL166W	CBF1
YER095W	CBF1
YDL059C	CBF1
YBR049C	CBF1
YIL118W	CBF1
YEL024W	CBF1
YIL119C	CBF1
YPR102C	CBF1
YDL020C	CBF1
YJR145C	CBF1
YIL127C	CBF1
YER125W	CBF1
YDR190C	CBF1
YPL235W	CBF1
YER043C	CBF1
YHR083W	CBF1
YGL056C	CBF1
YIL074C	CBF1
YJL168C	CBF1
YHR098C	CBF1
YMR216C	CBF1
YOR327C	CBF1
snR47	CBF1
YHR136C	CBF1
YBR250W	CBF1
YGL207W	CBF1
YHR041C	CBF1
YIL126W	CBF1
YLR092W	CBF1
YDR297W	CBF1
YJL187C	CBF1
YER111C	CBF1
YER071C	CBF1
YJR009C	CBF1
YBR083W	CBF1
tEUUCI	CBF1
YHR099W	CBF1
YBR082C	CBF1
YER100W	CBF1
YIL031W	CBF1
YDL058W	CBF1
YJL109C	CBF1
YOR054C	CBF1
YER072W	CBF1
YMR197C	CBF1
YNL283C	CBF1
YAL018C	CBF1
YIR018W	CBF1
YBR255CA	CBF1
YCR087CA	CBF1
YNL064C	CBF1
YDR042C	CBF1
YEL025C	CBF1
YEL043W	CBF1
YFL017WA	CBF1
YGR234W	CBF1
YHR033W	CBF1
YHR112C	CBF1
YIR007W	CBF1
YJL133CA	CBF1
YML018C	CBF1
YML119W	CBF1
YMR196W	CBF1
YFR049W	CBF1
YOR064C	CBF1
YNL095C	CBF1
YNL277WA	CBF1
YNR014W	CBF1
YOR298CA	CBF1
Cluster_MacIsaac_CHA4
YCL064C	CHA4
YKL008C	CHA4
YKL143W	CHA4
YGL171W	CHA4
YKL144C	CHA4
YER047C	CHA4
YDR310C	CHA4
YDR311W	CHA4
YCL063W	CHA4
YJR133W	CHA4
YNL010W	CHA4
YNL011C	CHA4
Cluster_MacIsaac_CIN5
YMR083W	CIN5
YEL052W	CIN5
YDR441C	CIN5
YML116W	CIN5
YDR301W	CIN5
YKL087C	CIN5
YOR030W	CIN5
YMR246W	CIN5
YKL182W	CIN5
YBR008C	CIN5
YOR178C	CIN5
YKR039W	CIN5
YDR508C	CIN5
YOL059W	CIN5
YKL026C	CIN5
YKL109W	CIN5
YJR147W	CIN5
YBR072W	CIN5
YCR021C	CIN5
YGL253W	CIN5
YMR081C	CIN5
YKR038C	CIN5
YGR238C	CIN5
YKL110C	CIN5
YEL053C	CIN5
YOL060C	CIN5
YGR249W	CIN5
YER028C	CIN5
YMR177W	CIN5
YGR171C	CIN5
YOL116W	CIN5
YGR010W	CIN5
YGR251W	CIN5
YKL043W	CIN5
YGR233C	CIN5
YIL045W	CIN5
YGL008C	CIN5
YGL006W	CIN5
YDR300C	CIN5
YIL118W	CIN5
YNL180C	CIN5
YPR065W	CIN5
YIL119C	CIN5
YNL178W	CIN5
YJR145C	CIN5
YHL034C	CIN5
YGR009C	CIN5
YPL165C	CIN5
YDR510W	CIN5
YER046W	CIN5
YKL086W	CIN5
YNL087W	CIN5
tDGUCK	CIN5
YGR192C	CIN5
YJR103W	CIN5
YJR102C	CIN5
YFL004W	CIN5
YOR230W	CIN5
YJR133W	CIN5
YAL037CA	CIN5
YAL037W	CIN5
YBR053C	CIN5
YDR338C	CIN5
YGL006WA	CIN5
YGL007CA	CIN5
YGR250C	CIN5
YGR234W	CIN5
YIR018CA	CIN5
YJR061W	CIN5
YLL054C	CIN5
YLR001C	CIN5
YMR090W	CIN5
YMR244CA	CIN5
YPR013C	CIN5
YPR022C	CIN5
YPR063C	CIN5
YBR054W	CIN5
YMR089C	CIN5
YOL109W	CIN5
Cluster_MacIsaac_CST6
YHR171W	CST6
YBR109C	CST6
YKL179C	CST6
YDR068W	CST6
YDR373W	CST6
YDR067C	CST6
YBR168W	CST6
YBR167C	CST6
YDR028C	CST6
YDR372C	CST6
Cluster_MacIsaac_DAL80
YDR127W	DAL80
YDL049C	DAL80
YHR091C	DAL80
YOL042W	DAL80
YOL043C	DAL80
YMR257C	DAL80
YLR082C	DAL80
YDR042C	DAL80
YOR093C	DAL80
Cluster_MacIsaac_DAL81
Cluster_MacIsaac_DAL82
YDR524C	DAL82
YPR145W	DAL82
YMR264W	DAL82
YIR027C	DAL82
YIR029W	DAL82
YIR028W	DAL82
YIR031C	DAL82
YIR030C	DAL82
YDR068W	DAL82
YNL280C	DAL82
YOL152W	DAL82
YER133W	DAL82
YDL171C	DAL82
YNL004W	DAL82
YBR086C	DAL82
YIR025W	DAL82
YDR033W	DAL82
YNL005C	DAL82
YPR144C	DAL82
YDR067C	DAL82
YHR071W	DAL82
YLR134W	DAL82
YOR360C	DAL82
YMR257C	DAL82
YNL279W	DAL82
YGR075C	DAL82
YDR032C	DAL82
YDR527W	DAL82
YBR087W	DAL82
YLR430W	DAL82
snR52	DAL82
YER046W	DAL82
YKL124W	DAL82
YGR166W	DAL82
YDL170W	DAL82
YDR042C	DAL82
YDR524CB	DAL82
YDR524WA	DAL82
YDR525WA	DAL82
YIR024C	DAL82
YKL096CB	DAL82
YKL096WA	DAL82
YMR251WA	DAL82
Cluster_MacIsaac_DIG1
YDR085C	DIG1
YOL082W	DIG1
YIL015W	DIG1
YPR171W	DIG1
YAR014C	DIG1
YLR353W	DIG1
YNL192W	DIG1
YMR198W	DIG1
YNL298W	DIG1
YGR108W	DIG1
YPR119W	DIG1
YGR189C	DIG1
YIL036W	DIG1
YPL177C	DIG1
YKL096W	DIG1
YNL280C	DIG1
YNR054C	DIG1
YBR040W	DIG1
YMR306W	DIG1
YLR454W	DIG1
YMR222C	DIG1
YCL027W	DIG1
YMR232W	DIG1
YBL016W	DIG1
YKL104C	DIG1
YDR309C	DIG1
YHR005C	DIG1
YFL027C	DIG1
YPR005C	DIG1
YKL189W	DIG1
YNL106C	DIG1
YCL055W	DIG1
YDR378C	DIG1
YLR332W	DIG1
YJL186W	DIG1
YGR165W	DIG1
YGR014W	DIG1
YNL053W	DIG1
YHR086W	DIG1
YBR060C	DIG1
YNL289W	DIG1
YDL127W	DIG1
YBL017C	DIG1
YCL056C	DIG1
YGR233C	DIG1
YDR466W	DIG1
YNL279W	DIG1
YIL037C	DIG1
YPL192C	DIG1
YPL156C	DIG1
YML047C	DIG1
YML046W	DIG1
YLR084C	DIG1
YDL135C	DIG1
YDR379W	DIG1
YLR453C	DIG1
YDR465C	DIG1
YJL148W	DIG1
YHR205W	DIG1
YMR305C	DIG1
YNL272C	DIG1
YIL123W	DIG1
YBL061C	DIG1
snR128	DIG1
snR190	DIG1
YKR091W	DIG1
YDR312W	DIG1
YLR452C	DIG1
YDR169C	DIG1
YHR084W	DIG1
YFL026W	DIG1
YPL163C	DIG1
YJL187C	DIG1
tDGUCL2	DIG1
YBR083W	DIG1
tEUUCG1	DIG1
tIAAUP2	DIG1
tKUUUG2	DIG1
tKUUUP	DIG1
tLUAAN	DIG1
tRUCUG2	DIG1
tXXXXD	DIG1
YBR082C	DIG1
YMR223W	DIG1
YEL040W	DIG1
YMR197C	DIG1
YDR169CA	DIG1
YBL060W	DIG1
YGR234W	DIG1
YKL095W	DIG1
YKL096CB	DIG1
Cluster_MacIsaac_FHL1
YMR116C	FHL1
YER101C	FHL1
YJL178C	FHL1
YLR074C	FHL1
YHL016C	FHL1
YLL043W	FHL1
YLR047C	FHL1
YOR355W	FHL1
YCL036W	FHL1
YJR147W	FHL1
YHR204W	FHL1
YGL136C	FHL1
YOR354C	FHL1
YBR188C	FHL1
YLR387C	FHL1
YNL180C	FHL1
YIL053W	FHL1
YOR095C	FHL1
YBL093C	FHL1
YLR075W	FHL1
YGR085C	FHL1
YDR418W	FHL1
YLR029C	FHL1
YIL133C	FHL1
YNL069C	FHL1
YKL180W	FHL1
YJL177W	FHL1
YGL135W	FHL1
YMR242C	FHL1
YOR312C	FHL1
YER117W	FHL1
YGR148C	FHL1
YOL127W	FHL1
YGL103W	FHL1
YIL018W	FHL1
YBL092W	FHL1
YOR234C	FHL1
YMR194W	FHL1
YLR325C	FHL1
YPL131W	FHL1
YHL033C	FHL1
YLL045C	FHL1
YGL147C	FHL1
YOL039W	FHL1
YGR214W	FHL1
YLR048W	FHL1
YBR048W	FHL1
YOL040C	FHL1
YML024W	FHL1
YDR447C	FHL1
YDR450W	FHL1
YML026C	FHL1
YOL121C	FHL1
YHL015W	FHL1
YGL189C	FHL1
YER131W	FHL1
YLR388W	FHL1
YDL061C	FHL1
YLR167W	FHL1
YNL178W	FHL1
YJR145C	FHL1
YHR203C	FHL1
YJR123W	FHL1
YPL090C	FHL1
YBR181C	FHL1
YOR096W	FHL1
YNL096C	FHL1
YER102W	FHL1
YBR189W	FHL1
YFR032C	FHL1
YGR213C	FHL1
YLR166C	FHL1
YER116C	FHL1
snR17a	FHL1
snR34	FHL1
YCL037C	FHL1
YPR080W	FHL1
YBR118W	FHL1
YBR117C	FHL1
YDL060W	FHL1
YDR449C	FHL1
YGL104C	FHL1
YER130C	FHL1
YFR031CA	FHL1
YFR032CA	FHL1
YFR032CB	FHL1
YOL128C	FHL1
YGL188CA	FHL1
YGR149W	FHL1
YHL015WA	FHL1
YIL055C	FHL1
YLR030W	FHL1
YLR326W	FHL1
YML025C	FHL1
YMR242WA	FHL1
YPL249CA	FHL1
Cluster_MacIsaac_FKH1
YPL227C	FKH1
YLR399C	FKH1
YJR092W	FKH1
YLR353W	FKH1
YGR041W	FKH1
YCR093W	FKH1
YBR029C	FKH1
YCL064C	FKH1
YMR198W	FKH1
YPR119W	FKH1
YLR210W	FKH1
YPL177C	FKH1
YGR092W	FKH1
YDR263C	FKH1
YER124C	FKH1
YKR054C	FKH1
YBR078W	FKH1
YEL015W	FKH1
YCR075C	FKH1
YGR098C	FKH1
YBR163W	FKH1
YFR019W	FKH1
YPR104C	FKH1
YPR035W	FKH1
YER122C	FKH1
YPL116W	FKH1
YPL117C	FKH1
YJR091C	FKH1
YPL155C	FKH1
YPL140C	FKH1
YCR092C	FKH1
YPL226W	FKH1
YEL016C	FKH1
YNL091W	FKH1
YLR209C	FKH1
YDR452W	FKH1
YFR051C	FKH1
YKR055W	FKH1
YBR030W	FKH1
YER070W	FKH1
YLR406C	FKH1
YFR004W	FKH1
YFR052W	FKH1
YER125W	FKH1
YGL028C	FKH1
YMR086W	FKH1
YBR077C	FKH1
YCL054W	FKH1
YMR117C	FKH1
YMR183C	FKH1
YHR084W	FKH1
YDL084W	FKH1
YPL032C	FKH1
YNL176C	FKH1
YGR099W	FKH1
tKUUUP	FKH1
YCL063W	FKH1
YMR197C	FKH1
YBR138C	FKH1
YBR139W	FKH1
YER123W	FKH1
YCR075WA	FKH1
YFR018C	FKH1
YDR451C	FKH1
YLR406CA	FKH1
YLR407W	FKH1
YFR003C	FKH1
Cluster_MacIsaac_FKH2
YGL021W	FKH2
YBR158W	FKH2
YNL172W	FKH2
YIL130W	FKH2
YLR399C	FKH2
YJR092W	FKH2
YGL116W	FKH2
YBR038W	FKH2
YMR198W	FKH2
YPR119W	FKH2
YMR199W	FKH2
YLR286C	FKH2
YGR092W	FKH2
YDR263C	FKH2
YER124C	FKH2
YDL101C	FKH2
YBR078W	FKH2
YDR147W	FKH2
YOR246C	FKH2
YHR032W	FKH2
YLR300W	FKH2
YIL131C	FKH2
YAL028W	FKH2
YHR061C	FKH2
YPR035W	FKH2
YBR009C	FKH2
YBR010W	FKH2
YPL116W	FKH2
YBR157C	FKH2
YPL117C	FKH2
YPL242C	FKH2
YJL051W	FKH2
YJR091C	FKH2
YDR148C	FKH2
YPL155C	FKH2
YAL024C	FKH2
YNL173C	FKH2
YDR033W	FKH2
YHR151C	FKH2
YAL029C	FKH2
YDR150W	FKH2
YNL056W	FKH2
YHL029C	FKH2
YBR094W	FKH2
YBR092C	FKH2
YBR093C	FKH2
YDR452W	FKH2
YDR032C	FKH2
YHL024W	FKH2
YER070W	FKH2
YML063W	FKH2
YHR031C	FKH2
YER125W	FKH2
YBR037C	FKH2
YIL123W	FKH2
YBR077C	FKH2
YCL054W	FKH2
YMR117C	FKH2
YHR152W	FKH2
YOR247W	FKH2
YMR183C	FKH2
YML052W	FKH2
YDR146C	FKH2
YNL176C	FKH2
YML064C	FKH2
tKUUUP	FKH2
YKR042W	FKH2
YMR197C	FKH2
YHL028W	FKH2
YDR259C	FKH2
YBR053C	FKH2
YBR138C	FKH2
YBR139W	FKH2
YDR222W	FKH2
YDR451C	FKH2
YML053C	FKH2
YNL058C	FKH2
YBR054W	FKH2
Cluster_MacIsaac_GAL4
YBR020W	GAL4
YDR009W	GAL4
YBR018C	GAL4
YML051W	GAL4
YOR120W	GAL4
YNL074C	GAL4
YNL073W	GAL4
YDR277C	GAL4
YGL134W	GAL4
YOR119C	GAL4
Cluster_MacIsaac_GAL80
YBR020W	GAL80
Cluster_MacIsaac_GAT1
YML099C	GAT1
YEL063C	GAT1
YIR029W	GAT1
YJR013W	GAT1
YDL238C	GAT1
YJL110C	GAT1
YLR023C	GAT1
YEL062W	GAT1
YML098W	GAT1
YJR011C	GAT1
Cluster_MacIsaac_GAT3
YIL018W	GAT3
Cluster_MacIsaac_GCN4
YKL103C	GCN4
YNL065W	GCN4
YOL058W	GCN4
YJL071W	GCN4
YJL088W	GCN4
YHR018C	GCN4
YER069W	GCN4
YMR062C	GCN4
YOL140W	GCN4
YDR127W	GCN4
YDR035W	GCN4
YBR249C	GCN4
YPR145W	GCN4
YGL180W	GCN4
YLR356W	GCN4
YKL016C	GCN4
YML116W	GCN4
YBR068C	GCN4
YJR025C	GCN4
YLR267W	GCN4
YEL063C	GCN4
YDL067C	GCN4
YJR109C	GCN4
YGR267C	GCN4
YMR136W	GCN4
YMR189W	GCN4
YDL198C	GCN4
YMR135C	GCN4
YPL137C	GCN4
YER040W	GCN4
YDL171C	GCN4
YOR202W	GCN4
YCL030C	GCN4
YIL116W	GCN4
YBR248C	GCN4
YJR147W	GCN4
YER052C	GCN4
YNL004W	GCN4
YKL101W	GCN4
YER039C	GCN4
YMR195W	GCN4
YPL250C	GCN4
YDL066W	GCN4
YBL076C	GCN4
YER086W	GCN4
YJR016C	GCN4
YLR355C	GCN4
YPL135W	GCN4
YLR451W	GCN4
YNL104C	GCN4
YIR034C	GCN4
YBR115C	GCN4
YHR024C	GCN4
YOL119C	GCN4
YOR221C	GCN4
YGL125W	GCN4
YPR167C	GCN4
YOL064C	GCN4
YNL103W	GCN4
YHR162W	GCN4
YOR201C	GCN4
YNL005C	GCN4
YMR188C	GCN4
YIL164C	GCN4
YJR112W	GCN4
YPR144C	GCN4
YEL062W	GCN4
YPR168W	GCN4
YOR222W	GCN4
YJL212C	GCN4
YLL004W	GCN4
YHR071W	GCN4
YLR266C	GCN4
YJL210W	GCN4
YBR257W	GCN4
YIL117C	GCN4
YJL072C	GCN4
YER089C	GCN4
YKL015W	GCN4
YBR043C	GCN4
YBR256C	GCN4
YMR063W	GCN4
YJR145C	GCN4
YOL117W	GCN4
YBR147W	GCN4
YBL103C	GCN4
YGR161C	GCN4
YPL273W	GCN4
YBL102W	GCN4
YNL311C	GCN4
YMR095C	GCN4
snR64	GCN4
YMR096W	GCN4
YBR250W	GCN4
YLL005C	GCN4
YGL184C	GCN4
YIL162W	GCN4
YHR025W	GCN4
YCR053W	GCN4
YGL186C	GCN4
YER090W	GCN4
YKL211C	GCN4
YDR354W	GCN4
YKL210W	GCN4
YDL170W	GCN4
YJL130C	GCN4
YGR094W	GCN4
YIL056W	GCN4
YML076C	GCN4
YPL252C	GCN4
YHR161C	GCN4
YER039CA	GCN4
YER085C	GCN4
YGR161WA	GCN4
YGR161WB	GCN4
YHR029C	GCN4
YHR122W	GCN4
YJR026W	GCN4
YJR027W	GCN4
YJR111C	GCN4
YKL033WA	GCN4
YMR194CB	GCN4
YJR110W	GCN4
YPL264C	GCN4
YPR036WA	GCN4
Cluster_MacIsaac_GCR1
YAL038W	GCR1
YAL039C	GCR1
YLR044C	GCR1
YHL034C	GCR1
YGR192C	GCR1
Cluster_MacIsaac_GCR2
YER177W	GCR2
YNL288W	GCR2
YAL038W	GCR2
YJL194W	GCR2
YAL039C	GCR2
YJL196C	GCR2
YHR174W	GCR2
YGR060W	GCR2
YKL060C	GCR2
YDR508C	GCR2
YKL152C	GCR2
YBR086C	GCR2
YJR010W	GCR2
YLR044C	GCR2
YGR240C	GCR2
YMR205C	GCR2
YOL084W	GCR2
YBR087W	GCR2
YJL148W	GCR2
YOR138C	GCR2
YHL034C	GCR2
YOR140W	GCR2
YDR510W	GCR2
snR128	GCR2
snR190	GCR2
snR40	GCR2
snR55	GCR2
snR57	GCR2
snR61	GCR2
YNL066W	GCR2
YJR009C	GCR2
YGR192C	GCR2
YOR230W	GCR2
YGR240CA	GCR2
YLR125W	GCR2
YMR206W	GCR2
YLR121C	GCR2
Cluster_MacIsaac_GLN3
YOL058W	GLN3
YPR145W	GLN3
YJR148W	GLN3
YLL015W	GLN3
YCL064C	GLN3
YJL172W	GLN3
YIR027C	GLN3
YIR029W	GLN3
YIR028W	GLN3
YJR152W	GLN3
YIR031C	GLN3
YJR151C	GLN3
YIR030C	GLN3
YPL265W	GLN3
YLL018C	GLN3
YHL016C	GLN3
YDL215C	GLN3
YPR035W	GLN3
YDL171C	GLN3
YCL030C	GLN3
YOL119C	GLN3
YDR031W	GLN3
YPR144C	GLN3
YGR233C	GLN3
YGL008C	GLN3
YGL006W	GLN3
YDR030C	GLN3
YNR018W	GLN3
YJL173C	GLN3
YIL118W	GLN3
YIL119C	GLN3
YHL015W	GLN3
YOL117W	GLN3
snR61	GLN3
YDL170W	GLN3
YCL063W	GLN3
YOR230W	GLN3
YGL006WA	GLN3
YGL007CA	GLN3
YGR234W	GLN3
YHR029C	GLN3
YHL015WA	GLN3
YJR151WA	GLN3
YOL109W	GLN3
Cluster_MacIsaac_GTS1
YFL011W	GTS1
YOL041C	GTS1
YFR040W	GTS1
YNL167C	GTS1
YFR039C	GTS1
Cluster_MacIsaac_GZF3
YLR023C	GZF3
tIAAUP2	GZF3
YLL048C	GZF3
Cluster_MacIsaac_HAC1
YOL030W	HAC1
YJL034W	HAC1
YFR042W	HAC1
YDL146W	HAC1
YOL031C	HAC1
YJL035C	HAC1
Cluster_MacIsaac_HAP1
YLR153C	HAP1
YJR105W	HAP1
YJR047C	HAP1
YKL052C	HAP1
YER048C	HAP1
YLR110C	HAP1
YOR349W	HAP1
YOR356W	HAP1
YGR110W	HAP1
YBL045C	HAP1
YOR316C	HAP1
YGL191W	HAP1
YER141W	HAP1
YGL187C	HAP1
YHR051W	HAP1
YMR256C	HAP1
YLR395C	HAP1
YML054C	HAP1
YNL111C	HAP1
YJR048W	HAP1
YEL039C	HAP1
YOR065W	HAP1
YLR206W	HAP1
YPL028W	HAP1
YHR007C	HAP1
YGR060W	HAP1
YGL001C	HAP1
YER044C	HAP1
YMR202W	HAP1
YMR015C	HAP1
YMR220W	HAP1
YHR190W	HAP1
YOR317W	HAP1
YKL182W	HAP1
YMR058W	HAP1
YNR060W	HAP1
YML075C	HAP1
YLR205C	HAP1
YLR113W	HAP1
YDR234W	HAP1
YOL027C	HAP1
YMR145C	HAP1
YGL055W	HAP1
YNL231C	HAP1
YKR046C	HAP1
YOR348C	HAP1
YFR033C	HAP1
YMR201C	HAP1
YKL019W	HAP1
YKL038W	HAP1
YDR233C	HAP1
YPL218W	HAP1
YGR049W	HAP1
YGL056C	HAP1
YKL051W	HAP1
YOL113W	HAP1
snR69	HAP1
YJR104C	HAP1
YKL020C	HAP1
YPR151C	HAP1
tQUUGE1	HAP1
YML028W	HAP1
tYGUAM1	HAP1
YJL048C	HAP1
YEL038W	HAP1
YBL044W	HAP1
YHR007CA	HAP1
YHR050WA	HAP1
YKL096CB	HAP1
YKL096WA	HAP1
YML054CA	HAP1
YOR064C	HAP1
YOL114C	HAP1
YOR316CA	HAP1
Cluster_MacIsaac_HAP2
YDR377W	HAP2
YLL015W	HAP2
YLR220W	HAP2
YGL187C	HAP2
YHR051W	HAP2
YPL018W	HAP2
YIR029W	HAP2
YIR030C	HAP2
YLL018C	HAP2
YDL171C	HAP2
YER174C	HAP2
YLL027W	HAP2
YGR121C	HAP2
YPR144C	HAP2
YGR233C	HAP2
YFR033C	HAP2
YDR529C	HAP2
YPL207W	HAP2
YGR019W	HAP2
YDL170W	HAP2
YPL019C	HAP2
YDR210W	HAP2
YGR121WA	HAP2
YGR122W	HAP2
YGR234W	HAP2
YHR050WA	HAP2
YOL077WA	HAP2
Cluster_MacIsaac_HAP3
YLR220W	HAP3
YGL187C	HAP3
YHR051W	HAP3
YCR028C	HAP3
YDL171C	HAP3
YER174C	HAP3
YNL009W	HAP3
YLL027W	HAP3
YML120C	HAP3
YPL207W	HAP3
YDL170W	HAP3
YHR050WA	HAP3
YML119W	HAP3
Cluster_MacIsaac_HAP4
YPL271W	HAP4
YDL004W	HAP4
YDR377W	HAP4
YBL099W	HAP4
YPR020W	HAP4
YBR039W	HAP4
YKL016C	HAP4
YBL045C	HAP4
YLR038C	HAP4
YGL191W	HAP4
YGL187C	HAP4
YNL052W	HAP4
YHR051W	HAP4
YMR256C	HAP4
YLR395C	HAP4
YDL067C	HAP4
YOR065W	HAP4
YDL066W	HAP4
YDL181W	HAP4
YPL270W	HAP4
YDL005C	HAP4
YBL030C	HAP4
YNL055C	HAP4
YKL015W	HAP4
YDR529C	HAP4
YEL024W	HAP4
YGR104C	HAP4
YBL029CA	HAP4
YBL029W	HAP4
YBL044W	HAP4
YDR322CA	HAP4
YEL025C	HAP4
YHR050WA	HAP4
YLR297W	HAP4
YOR064C	HAP4
YNL054WA	HAP4
YOL077WA	HAP4
YPL272C	HAP4
Cluster_MacIsaac_HAP5
YDR384C	HAP5
YBL099W	HAP5
YLR220W	HAP5
YGL187C	HAP5
YHR051W	HAP5
YDR385W	HAP5
YKL182W	HAP5
YER174C	HAP5
YFL027C	HAP5
YLL027W	HAP5
YPR144C	HAP5
YIL013C	HAP5
YGR233C	HAP5
YDR529C	HAP5
YDR077W	HAP5
YFL026W	HAP5
YHR006W	HAP5
YIL011W	HAP5
tTAGUH	HAP5
YPL207W	HAP5
YGR234W	HAP5
YHR005CA	HAP5
YHR050WA	HAP5
Cluster_MacIsaac_HSF1
YCL050C	HSF1
YGR142W	HSF1
YOR299W	HSF1
YLR216C	HSF1
YGR146C	HSF1
YAL003W	HSF1
YBR101C	HSF1
YHR104W	HSF1
YFL014W	HSF1
YBR072W	HSF1
YDR171W	HSF1
YDR258C	HSF1
YOL081W	HSF1
YJL034W	HSF1
YNL006W	HSF1
YFL016C	HSF1
YDL020C	HSF1
YNL007C	HSF1
snR18	HSF1
YAL005C	HSF1
YBL075C	HSF1
YER103W	HSF1
YPL106C	HSF1
YBR169C	HSF1
YOR027W	HSF1
YJL035C	HSF1
YLL039C	HSF1
YDL180W	HSF1
YGR146CA	HSF1
YGR210C	HSF1
YOR298CA	HSF1
YGR211W	HSF1
Cluster_MacIsaac_IME1
YDL154W	IME1
YHL036W	IME1
YGR017W	IME1
Cluster_MacIsaac_INO2
YJR105W	INO2
YBR029C	INO2
YOR316C	INO2
YDR147W	INO2
YOR317W	INO2
YKL182W	INO2
YPL231W	INO2
YML075C	INO2
YJL153C	INO2
YDR497C	INO2
YGR238C	INO2
YDL049C	INO2
YHL020C	INO2
YNL169C	INO2
YCR057C	INO2
YBR030W	INO2
YJL140W	INO2
YOR234C	INO2
YLR034C	INO2
snR17a	INO2
YJR104C	INO2
YDR169C	INO2
YDR146C	INO2
YNR017W	INO2
YJL141C	INO2
YDR169CA	INO2
YOR316CA	INO2
Cluster_MacIsaac_INO4
YJR105W	INO4
YBR029C	INO4
YER026C	INO4
YGR157W	INO4
YOR316C	INO4
YDR147W	INO4
YHR123W	INO4
YJL167W	INO4
YOR317W	INO4
YKL182W	INO4
YPL231W	INO4
YDR497C	INO4
YGR238C	INO4
YNL169C	INO4
YBR030W	INO4
YER043C	INO4
YJL168C	INO4
YJR104C	INO4
YBL106C	INO4
YDR146C	INO4
YNR017W	INO4
YDR050C	INO4
YJL048C	INO4
YOR316CA	INO4
YPR013C	INO4
Cluster_MacIsaac_IXR1
YKR076W	IXR1
YKL043W	IXR1
YIL118W	IXR1
YIL119C	IXR1
YKR075C	IXR1
Cluster_MacIsaac_LEU3
YBR068C	LEU3
YOR271C	LEU3
YMR108W	LEU3
YJR016C	LEU3
YLR355C	LEU3
YGL009C	LEU3
YNL104C	LEU3
YNL103W	LEU3
YKL120W	LEU3
snR8	LEU3
YOR272W	LEU3
Cluster_MacIsaac_MAC1
YPL177C	MAC1
YER145C	MAC1
YIL116W	MAC1
YJR050W	MAC1
YGR136W	MAC1
YER146W	MAC1
YGL136C	MAC1
YIL117C	MAC1
YJL148W	MAC1
YGL135W	MAC1
snR128	MAC1
snR190	MAC1
YJL048C	MAC1
YJR049C	MAC1
YJL047CA	MAC1
YPR125W	MAC1
Cluster_MacIsaac_MATA1
YBR282W	MATA1
Cluster_MacIsaac_MBP1
YDR524C	MBP1
YNL219C	MBP1
YKL103C	MBP1
YNL077W	MBP1
YJL115W	MBP1
YJR001W	MBP1
YIL140W	MBP1
YGR041W	MBP1
YKL007W	MBP1
YOR074C	MBP1
YLR103C	MBP1
YJL194W	MBP1
YDL017W	MBP1
YNL192W	MBP1
YNL298W	MBP1
YPR120C	MBP1
YGR109C	MBP1
YMR199W	MBP1
YGR189C	MBP1
YMR078C	MBP1
YDR263C	MBP1
YDR093W	MBP1
YPR175W	MBP1
YDL101C	MBP1
YBR078W	MBP1
YJL196C	MBP1
YNL313C	MBP1
YDL018C	MBP1
YHR110W	MBP1
YML012W	MBP1
YLR300W	MBP1
YMR306W	MBP1
YMR307W	MBP1
YHR061C	MBP1
YDR309C	MBP1
YDR507C	MBP1
YNL274C	MBP1
YCR065W	MBP1
YDR528W	MBP1
YKL101W	MBP1
YPL015C	MBP1
YLR384C	MBP1
YIL026C	MBP1
YJL073W	MBP1
YPR159W	MBP1
YKL008C	MBP1
YLR104W	MBP1
YER112W	MBP1
YDL003W	MBP1
YNL218W	MBP1
YJL186W	MBP1
YCL061C	MBP1
YOR066W	MBP1
YKR077W	MBP1
YDR097C	MBP1
YJL116C	MBP1
YNR009W	MBP1
YGR078C	MBP1
YNL289W	MBP1
YNL231C	MBP1
YDR113C	MBP1
YGR222W	MBP1
YHR150W	MBP1
YBL035C	MBP1
YNL102W	MBP1
YJR043C	MBP1
YDR452W	MBP1
YPL153C	MBP1
YDR527W	MBP1
YAR007C	MBP1
YNL312W	MBP1
YER070W	MBP1
YPL152W	MBP1
YHR154W	MBP1
RUF1	MBP1
YMR305C	MBP1
YMR079W	MBP1
YLR430W	MBP1
YAR008W	MBP1
YER118C	MBP1
YHR149C	MBP1
YBR077C	MBP1
YJL074C	MBP1
YHR153C	MBP1
YMR179W	MBP1
YDR297W	MBP1
YLR385C	MBP1
YJL187C	MBP1
YER111C	MBP1
tAAGCP	MBP1
tCGCAP2	MBP1
YPR121W	MBP1
YNL273W	MBP1
YGR221C	MBP1
YOR075W	MBP1
YLR386W	MBP1
YDR115W	MBP1
YDR524CB	MBP1
YDR524WA	MBP1
YDR525WA	MBP1
YGR079W	MBP1
YGR109WA	MBP1
YGR109WB	MBP1
YDR451C	MBP1
YJR030C	MBP1
YMR279C	MBP1
YML027W	MBP1
YPL014W	MBP1
YPL152WA	MBP1
YPR174C	MBP1
Cluster_MacIsaac_MCM1
YLR189C	MCM1
YJR092W	MCM1
YKL208W	MCM1
YMR001C	MCM1
YJL194W	MCM1
YNL298W	MCM1
YPR119W	MCM1
YAL040C	MCM1
YGR092W	MCM1
YDR147W	MCM1
YJL196C	MCM1
YMR255W	MCM1
YHR005C	MCM1
YFL027C	MCM1
YDR528W	MCM1
YJL159W	MCM1
YDR191W	MCM1
YJL051W	MCM1
YJR091C	MCM1
YAR018C	MCM1
YER112W	MCM1
YLR274W	MCM1
YMR002W	MCM1
YLR190W	MCM1
YPR112C	MCM1
YOR066W	MCM1
YNL053W	MCM1
YHR151C	MCM1
YDL089W	MCM1
YNL056W	MCM1
YNL289W	MCM1
YLR273C	MCM1
YPR113W	MCM1
YIL122W	MCM1
YDL090C	MCM1
RUF1	MCM1
YDR190C	MCM1
YHR098C	MCM1
YIL123W	MCM1
YHR152W	MCM1
YFL026W	MCM1
YKL209C	MCM1
YML052W	MCM1
YER111C	MCM1
YDR146C	MCM1
YGR047C	MCM1
tKUUUP	MCM1
YHR099W	MCM1
YGR048W	MCM1
YKR042W	MCM1
YER158C	MCM1
YNL160W	MCM1
YJL160C	MCM1
YML053C	MCM1
YMR001CA	MCM1
YMR253C	MCM1
YNL058C	MCM1
Cluster_MacIsaac_MET31
YAL012W	MET31
YHR193C	MET31
YER133W	MET31
YER092W	MET31
YJR138W	MET31
YHR194W	MET31
YPR167C	MET31
YNL277W	MET31
YJR137C	MET31
YER091C	MET31
YPR168W	MET31
YJL212C	MET31
YJL210W	MET31
YJL191W	MET31
YLR180W	MET31
snR52	MET31
snR56	MET31
YJL192C	MET31
YGL184C	MET31
YDR042C	MET31
YLR179C	MET31
YNL277WA	MET31
Cluster_MacIsaac_MET32
YER092W	MET32
YJR138W	MET32
YFR030W	MET32
YKL001C	MET32
YPR167C	MET32
YNL277W	MET32
YJR010W	MET32
YJR137C	MET32
YER091C	MET32
YGR055W	MET32
YPR168W	MET32
YDL059C	MET32
YLR180W	MET32
YLR092W	MET32
YJR009C	MET32
YDL058W	MET32
YLR179C	MET32
YNL277WA	MET32
Cluster_MacIsaac_MET4
YFR030W	MET4
YNL277W	MET4
YER091C	MET4
YGR055W	MET4
YLR180W	MET4
YLR092W	MET4
YLR179C	MET4
YNL277WA	MET4
Cluster_MacIsaac_MIG1
YOR178C	MIG1
YPR184W	MIG1
Cluster_MacIsaac_MOT3
YPL137C	MOT3
YNL037C	MOT3
YPL135W	MOT3
YNL036W	MOT3
YEL060C	MOT3
YIL118W	MOT3
YIL119C	MOT3
YDR077W	MOT3
YKR042W	MOT3
YMR106C	MOT3
Cluster_MacIsaac_MSN2
YDR524C	MSN2
YKL052C	MSN2
YJR001W	MSN2
YER177W	MSN2
YKR066C	MSN2
YGR255C	MSN2
YGR088W	MSN2
YML101C	MSN2
YKL096W	MSN2
YMR173W	MSN2
YAL003W	MSN2
YGR071C	MSN2
YGR052W	MSN2
YML006C	MSN2
YGR256W	MSN2
YPR160W	MSN2
YKR067W	MSN2
YHR104W	MSN2
YLR258W	MSN2
YOR227W	MSN2
YCR021C	MSN2
YDR171W	MSN2
YDR258C	MSN2
YOR226C	MSN2
YNL006W	MSN2
YKL085W	MSN2
YGR249W	MSN2
YDR033W	MSN2
YKR052C	MSN2
YKL062W	MSN2
YNL156C	MSN2
YGR087C	MSN2
YBR168W	MSN2
YCR012W	MSN2
YBR167C	MSN2
YDR032C	MSN2
YDR527W	MSN2
YOR018W	MSN2
YKL051W	MSN2
YNL007C	MSN2
YOL113W	MSN2
snR18	MSN2
YAL005C	MSN2
YJR045C	MSN2
YJR046W	MSN2
YGR192C	MSN2
tEUUCE1	MSN2
tGGCCP2	MSN2
YGL096W	MSN2
YDR050C	MSN2
YJL164C	MSN2
YML100W	MSN2
YDR084C	MSN2
YGR072W	MSN2
YBR085CA	MSN2
YDR132C	MSN2
YDR524CB	MSN2
[truncated: 74,213 more rows]
