# Supplementary material for: Single-cell RNA sequencing reveals intrinsic and extrinsic regulatory heterogeneity in yeast responding to stress
Source: PLoS Biol. 2017 Dec 14;15(12):e2004050. doi: 10.1371/journal.pbio.2004050 (PMC5746276; doi:10.1371/journal.pbio.2004050)
Supplement: S9 Table — (XLSX) [file pbio.2004050.s009.xlsx]

## Sheet: Sheet1
Cell Name	Treatment	Fig 1C order	Cell cycle phase	reduced RP expressionin unstressed cells (arrowed cells, Fig 2C, FDR<0.01)	Higher Hsf1 targets, Fig 6D (FDR < 0.053)	Higher Rpn4 targets, Fig 6E (FDR < 0.05)	Altered Glycolysis Expression (FDR < 0.05)
BY4741_Unstressed_1784042189_BY43	unstressed (before NaCl treatment)	1	S	.	.	.	.
BY4741_Unstressed_1784042189_BY45	unstressed (before NaCl treatment)	2	S	.	.	.	.
BY4741_Unstressed_1784042189_BY63	unstressed (before NaCl treatment)	3	unclassified	.	.	.	.
BY4741_Unstressed_1784042189_BY15	unstressed (before NaCl treatment)	4	G1 DNA replication	.	.	.	.
BY4741_Unstressed_1784042189_BY38	unstressed (before NaCl treatment)	5	G1 DNA replication	.	.	.	.
BY4741_Unstressed_1784042189_BY37	unstressed (before NaCl treatment)	6	G1 DNA replication	.	.	.	.
BY4741_Unstressed_1784042189_BY62	unstressed (before NaCl treatment)	7	G1	.	.	.	.
BY4741_Unstressed_1784042189_BY6	unstressed (before NaCl treatment)	8	S	.	.	.	.
BY4741_Unstressed_1784042189_BY66	unstressed (before NaCl treatment)	9	S	.	.	.	.
BY4741_Unstressed_1784042189_BY78	unstressed (before NaCl treatment)	10	G1 entry	.	.	.	.
BY4741_Unstressed_1784042189_BY61	unstressed (before NaCl treatment)	11	M/G1	.	.	.	.
BY4741_Unstressed_1784042189_BY17	unstressed (before NaCl treatment)	12	S	.	.	.	.
BY4741_Unstressed_1784042189_BY13	unstressed (before NaCl treatment)	13	G1 DNA replication	.	.	.	.
BY4741_Unstressed_1784042189_BY91	unstressed (before NaCl treatment)	14	unclassified	.	.	.	.
BY4741_Unstressed_1784042189_BY88	unstressed (before NaCl treatment)	15	G1-S	.	.	.	.
BY4741_Unstressed_1784042189_BY31	unstressed (before NaCl treatment)	16	M/G1	.	.	.	.
BY4741_Unstressed_1784042189_BY5	unstressed (before NaCl treatment)	17	S	.	.	.	.
BY4741_Unstressed_1784042189_BY65	unstressed (before NaCl treatment)	18	G1 entry	.	.	.	.
BY4741_Unstressed_1784042189_BY79	unstressed (before NaCl treatment)	19	G1	.	.	.	.
BY4741_Unstressed_1784042189_BY8	unstressed (before NaCl treatment)	20	G1-S	.	.	.	.
BY4741_Unstressed_1784042189_BY39	unstressed (before NaCl treatment)	21	unclassified	.	.	.	.
BY4741_Unstressed_1784042189_BY80	unstressed (before NaCl treatment)	22	G1	.	.	.	.
BY4741_Unstressed_1784042189_BY74	unstressed (before NaCl treatment)	23	G1	.	.	.	.
BY4741_Unstressed_1784042189_BY20	unstressed (before NaCl treatment)	24	G1-S	reduced RP in unstressed cells (arrowed cells, Fig 2C)	.	.	.
BY4741_Unstressed_1784042189_BY9	unstressed (before NaCl treatment)	25	unclassified	.	.	.	.
BY4741_Unstressed_1784042189_BY86	unstressed (before NaCl treatment)	26	G1	.	.	.	.
BY4741_Unstressed_1784042189_BY29	unstressed (before NaCl treatment)	27	G1 DNA replication	.	.	.	.
BY4741_Unstressed_1784042189_BY51	unstressed (before NaCl treatment)	28	G1 DNA replication	.	.	.	.
BY4741_Unstressed_1784042189_BY54	unstressed (before NaCl treatment)	29	unclassified	.	.	.	.
BY4741_Unstressed_1784042189_BY21	unstressed (before NaCl treatment)	30	G1	.	.	.	.
BY4741_Unstressed_1784042189_BY71	unstressed (before NaCl treatment)	31	G1	.	.	.	.
BY4741_Unstressed_1784042189_BY24	unstressed (before NaCl treatment)	32	S	.	.	.	.
BY4741_Unstressed_1784042189_BY2	unstressed (before NaCl treatment)	33	G1-S	.	.	.	.
BY4741_Unstressed_1784042189_BY35	unstressed (before NaCl treatment)	34	G1 DNA replication	.	.	.	.
BY4741_Unstressed_1784042189_BY77	unstressed (before NaCl treatment)	35	G1 entry	.	.	.	.
BY4741_Unstressed_1784042189_BY19	unstressed (before NaCl treatment)	36	G1 DNA replication	.	.	.	.
BY4741_Unstressed_1784042189_BY73	unstressed (before NaCl treatment)	37	M/G1	.	.	.	.
BY4741_Unstressed_1784042189_BY12	unstressed (before NaCl treatment)	38	S	.	.	.	.
BY4741_Unstressed_1784042189_BY68	unstressed (before NaCl treatment)	39	G1 DNA replication	.	.	.	.
BY4741_Unstressed_1784042189_BY22	unstressed (before NaCl treatment)	40	M/G1	.	.	.	.
BY4741_Unstressed_1784042189_BY28	unstressed (before NaCl treatment)	41	G1-S	.	.	.	.
BY4741_Unstressed_1784042189_BY92	unstressed (before NaCl treatment)	42	M/G1	.	.	.	.
BY4741_Unstressed_1784042189_BY87	unstressed (before NaCl treatment)	43	unclassified	.	.	.	.
BY4741_Unstressed_1784042189_BY56	unstressed (before NaCl treatment)	44	G1-S	.	.	.	.
BY4741_Unstressed_1784042189_BY57	unstressed (before NaCl treatment)	45	unclassified	reduced RP in unstressed cells (arrowed cells, Fig 2C)	.	.	.
BY4741_Unstressed_1784042189_BY81	unstressed (before NaCl treatment)	46	M/G1	.	.	.	.
BY4741_Unstressed_1784042189_BY10	unstressed (before NaCl treatment)	47	G1 DNA replication	.	.	.	.
BY4741_Unstressed_1784042189_BY90	unstressed (before NaCl treatment)	48	G1-S	.	.	.	Altered Glycolysis Expression (FDR < 0.05)
BY4741_Unstressed_1784042189_BY34	unstressed (before NaCl treatment)	49	S	.	.	.	.
BY4741_Unstressed_1784042189_BY85	unstressed (before NaCl treatment)	50	G1 DNA replication	reduced RP in unstressed cells (arrowed cells, Fig 2C)	.	.	.
BY4741_Unstressed_1784042189_BY82	unstressed (before NaCl treatment)	51	G1	.	.	.	.
BY4741_Unstressed_1784042189_BY11	unstressed (before NaCl treatment)	52	G1 DNA replication	.	.	.	.
BY4741_Unstressed_1784042189_BY76	unstressed (before NaCl treatment)	53	G1 entry	.	.	.	.
BY4741_Unstressed_1784042189_BY72	unstressed (before NaCl treatment)	54	G1 entry	.	.	.	.
BY4741_Unstressed_1784042189_BY18	unstressed (before NaCl treatment)	55	G1	.	.	.	Altered Glycolysis Expression (FDR < 0.05)
BY4741_Unstressed_1784042189_BY67	unstressed (before NaCl treatment)	56	S	reduced RP in unstressed cells (arrowed cells, Fig 2C)	.	.	.
BY4741_Unstressed_1784042189_BY23	unstressed (before NaCl treatment)	57	unclassified	.	.	.	.
BY4741_Unstressed_1784042189_BY49	unstressed (before NaCl treatment)	58	S	.	.	.	.
BY4741_Unstressed_1784042189_BY89	unstressed (before NaCl treatment)	59	unclassified	.	.	.	.
BY4741_Unstressed_1784042189_BY16	unstressed (before NaCl treatment)	60	S	reduced RP in unstressed cells (arrowed cells, Fig 2C)	.	.	.
BY4741_Unstressed_1784042189_BY25	unstressed (before NaCl treatment)	61	unclassified	.	.	.	.
BY4741_Unstressed_1784042189_BY1	unstressed (before NaCl treatment)	62	G1	.	.	.	.
BY4741_Unstressed_1784042189_BY83	unstressed (before NaCl treatment)	63	unclassified	.	.	.	.
BY4741_Unstressed_1784042189_BY64	unstressed (before NaCl treatment)	64	G1 entry	.	.	.	.
BY4741_Unstressed_1784042189_BY14	unstressed (before NaCl treatment)	65	G1 entry	.	.	.	.
BY4741_Unstressed_1784042189_BY26	unstressed (before NaCl treatment)	66	S	reduced RP in unstressed cells (arrowed cells, Fig 2C)	.	.	.
BY4741_Unstressed_1784042189_BY75	unstressed (before NaCl treatment)	67	G1 entry	.	.	.	.
BY4741_Unstressed_1784042189_BY53	unstressed (before NaCl treatment)	68	unclassified	.	.	.	.
BY4741_Unstressed_1784042189_BY32	unstressed (before NaCl treatment)	69	unclassified	.	.	.	.
BY4741_Unstressed_1784042189_BY60	unstressed (before NaCl treatment)	70	S	reduced RP in unstressed cells (arrowed cells, Fig 2C)	.	.	.
BY4741_Unstressed_1784042189_BY55	unstressed (before NaCl treatment)	71	G1 entry	.	.	.	.
BY4741_Unstressed_1784042189_BY70	unstressed (before NaCl treatment)	72	M/G1	.	.	.	.
BY4741_Unstressed_1784042189_BY58	unstressed (before NaCl treatment)	73	G1 entry	.	.	.	.
BY4741_Unstressed_1784042189_BY84	unstressed (before NaCl treatment)	74	unclassified	.	.	.	.
BY4741_Unstressed_1784042189_BY50	unstressed (before NaCl treatment)	75	G1	.	.	.	.
BY4741_Unstressed_1784042189_BY94	unstressed (before NaCl treatment)	76	S	.	.	.	.
BY4741_Unstressed_1784042189_BY3	unstressed (before NaCl treatment)	77	S	.	.	.	.
BY4741_Unstressed_1784042189_BY52	unstressed (before NaCl treatment)	78	G1 entry	.	.	.	.
BY4741_Unstressed_1784042189_BY4	unstressed (before NaCl treatment)	79	S	.	.	.	.
BY4741_Unstressed_1784042189_BY93	unstressed (before NaCl treatment)	80	G1-S	.	.	.	.
BY4741_Unstressed_1784042189_BY33	unstressed (before NaCl treatment)	81	unclassified	reduced RP in unstressed cells (arrowed cells, Fig 2C)	.	.	.
BY4741_Unstressed_1784042189_BY7	unstressed (before NaCl treatment)	82	M/G1	reduced RP in unstressed cells (arrowed cells, Fig 2C)	.	.	.
BY4741_Unstressed_1784042189_BY59	unstressed (before NaCl treatment)	83	S	reduced RP in unstressed cells (arrowed cells, Fig 2C)	.	.	.
BY4741_Stressed_1784042160_C50_BY5	30 min post 0.7M NaCl treatment ('stressed')	85	unclassified	.	.	.	.
BY4741_Stressed_1784042160_C50_BY78	30 min post 0.7M NaCl treatment ('stressed')	86	S	.	.	.	.
BY4741_Stressed_1784042160_C50_BY29	30 min post 0.7M NaCl treatment ('stressed')	87	G1-S	.	Higher expression of Hsf1 targets (FDR < 0.053, compared only to stressed cells)	.	Altered Glycolysis Expression (FDR < 0.05)
BY4741_Stressed_1784042160_C50_BY22	30 min post 0.7M NaCl treatment ('stressed')	88	unclassified	.	.	.	.
BY4741_Stressed_1784042160_C50_BY79	30 min post 0.7M NaCl treatment ('stressed')	89	G1 entry	.	.	.	.
BY4741_Stressed_1784042160_C50_BY89	30 min post 0.7M NaCl treatment ('stressed')	90	unclassified	.	.	.	.
BY4741_Stressed_1784042160_C50_BY86	30 min post 0.7M NaCl treatment ('stressed')	91	G1 entry	.	.	.	.
BY4741_Stressed_1784042160_C50_BY82	30 min post 0.7M NaCl treatment ('stressed')	92	S	.	.	.	.
BY4741_Stressed_1784042160_C50_BY34	30 min post 0.7M NaCl treatment ('stressed')	93	unclassified	.	.	.	.
BY4741_Stressed_1784042160_C50_BY77	30 min post 0.7M NaCl treatment ('stressed')	94	G1 DNA replication	.	.	.	.
BY4741_Stressed_1784042160_C50_BY55	30 min post 0.7M NaCl treatment ('stressed')	95	G1 DNA replication	.	.	.	.
BY4741_Stressed_1784042160_C50_BY44	30 min post 0.7M NaCl treatment ('stressed')	96	S	.	.	Higher expression of Rpn4 targets (FDR < 0.05, compared only to stressed cells)	Altered Glycolysis Expression (FDR < 0.05)
BY4741_Stressed_1784042160_C50_BY49	30 min post 0.7M NaCl treatment ('stressed')	97	G1	.	.	.	.
BY4741_Stressed_1784042160_C50_BY10	30 min post 0.7M NaCl treatment ('stressed')	98	unclassified	.	.	.	.
BY4741_Stressed_1784042160_C50_BY87	30 min post 0.7M NaCl treatment ('stressed')	99	unclassified	.	.	.	.
BY4741_Stressed_1784042160_C50_BY8	30 min post 0.7M NaCl treatment ('stressed')	100	G1 DNA replication	.	.	Higher expression of Rpn4 targets (FDR < 0.05, compared only to stressed cells)	.
BY4741_Stressed_1784042160_C50_BY14	30 min post 0.7M NaCl treatment ('stressed')	101	M/G1	.	.	.	.
BY4741_Stressed_1784042160_C50_BY75	30 min post 0.7M NaCl treatment ('stressed')	102	unclassified	.	.	.	.
BY4741_Stressed_1784042160_C50_BY13	30 min post 0.7M NaCl treatment ('stressed')	103	G1 DNA replication	.	Higher expression of Hsf1 targets (FDR < 0.053, compared only to stressed cells)	.	.
BY4741_Stressed_1784042160_C50_BY26	30 min post 0.7M NaCl treatment ('stressed')	104	G1 entry	.	.	.	.
BY4741_Stressed_1784042160_C50_BY71	30 min post 0.7M NaCl treatment ('stressed')	105	unclassified	.	.	.	.
BY4741_Stressed_1784042160_C50_BY42	30 min post 0.7M NaCl treatment ('stressed')	106	S	.	.	Higher expression of Rpn4 targets (FDR < 0.05, compared only to stressed cells)	Altered Glycolysis Expression (FDR < 0.05)
BY4741_Stressed_1784042160_C50_BY11	30 min post 0.7M NaCl treatment ('stressed')	107	G1 entry	.	.	.	.
BY4741_Stressed_1784042160_C50_BY52	30 min post 0.7M NaCl treatment ('stressed')	108	M/G1	.	Higher expression of Hsf1 targets (FDR < 0.053, compared only to stressed cells)	.	.
BY4741_Stressed_1784042160_C50_BY9	30 min post 0.7M NaCl treatment ('stressed')	109	unclassified	.	.	.	Altered Glycolysis Expression (FDR < 0.05)
BY4741_Stressed_1784042160_C50_BY18	30 min post 0.7M NaCl treatment ('stressed')	110	G1 DNA replication	.	.	.	Altered Glycolysis Expression (FDR < 0.05)
BY4741_Stressed_1784042160_C50_BY35	30 min post 0.7M NaCl treatment ('stressed')	111	M/G1	.	.	.	.
BY4741_Stressed_1784042160_C50_BY50	30 min post 0.7M NaCl treatment ('stressed')	112	G1 entry	.	.	.	Altered Glycolysis Expression (FDR < 0.05)
BY4741_Stressed_1784042160_C50_BY63	30 min post 0.7M NaCl treatment ('stressed')	113	unclassified	.	.	.	.
BY4741_Stressed_1784042160_C50_BY2	30 min post 0.7M NaCl treatment ('stressed')	114	unclassified	.	.	Higher expression of Rpn4 targets (FDR < 0.05, compared only to stressed cells)	.
BY4741_Stressed_1784042160_C50_BY70	30 min post 0.7M NaCl treatment ('stressed')	115	M/G1	.	.	.	.
BY4741_Stressed_1784042160_C50_BY1	30 min post 0.7M NaCl treatment ('stressed')	116	G1 DNA replication	.	.	.	.
BY4741_Stressed_1784042160_C50_BY19	30 min post 0.7M NaCl treatment ('stressed')	117	G1 DNA replication	.	.	.	.
BY4741_Stressed_1784042160_C50_BY57	30 min post 0.7M NaCl treatment ('stressed')	118	M/G1	.	.	.	.
BY4741_Stressed_1784042160_C50_BY88	30 min post 0.7M NaCl treatment ('stressed')	119	S	.	.	.	.
BY4741_Stressed_1784042160_C50_BY30	30 min post 0.7M NaCl treatment ('stressed')	120	unclassified	.	.	.	Altered Glycolysis Expression (FDR < 0.05)
BY4741_Stressed_1784042160_C50_BY84	30 min post 0.7M NaCl treatment ('stressed')	121	unclassified	.	.	.	.
BY4741_Stressed_1784042160_C50_BY31	30 min post 0.7M NaCl treatment ('stressed')	122	unclassified	.	.	.	.
BY4741_Stressed_1784042160_C50_BY59	30 min post 0.7M NaCl treatment ('stressed')	123	G1 DNA replication	.	.	.	.
BY4741_Stressed_1784042160_C50_BY7	30 min post 0.7M NaCl treatment ('stressed')	124	unclassified	.	.	.	.
BY4741_Stressed_1784042160_C50_BY54	30 min post 0.7M NaCl treatment ('stressed')	125	unclassified	.	.	.	.
BY4741_Stressed_1784042160_C50_BY36	30 min post 0.7M NaCl treatment ('stressed')	126	G1 entry	.	.	.	.
BY4741_Stressed_1784042160_C50_BY27	30 min post 0.7M NaCl treatment ('stressed')	127	unclassified	.	.	Higher expression of Rpn4 targets (FDR < 0.05, compared only to stressed cells)	.
BY4741_Stressed_1784042160_C50_BY62	30 min post 0.7M NaCl treatment ('stressed')	128	G1 entry	.	.	.	.
BY4741_Stressed_1784042160_C50_BY53	30 min post 0.7M NaCl treatment ('stressed')	129	G1	.	.	.	.
BY4741_Stressed_1784042160_C50_BY37	30 min post 0.7M NaCl treatment ('stressed')	130	G1 entry	.	.	.	.
BY4741_Stressed_1784042160_C50_BY3	30 min post 0.7M NaCl treatment ('stressed')	131	G1	.	Higher expression of Hsf1 targets (FDR < 0.053, compared only to stressed cells)	.	.
BY4741_Stressed_1784042160_C50_BY51	30 min post 0.7M NaCl treatment ('stressed')	132	G1 entry	.	.	.	.
BY4741_Stressed_1784042160_C50_BY85	30 min post 0.7M NaCl treatment ('stressed')	133	unclassified	.	.	.	.
BY4741_Stressed_1784042160_C50_BY69	30 min post 0.7M NaCl treatment ('stressed')	134	unclassified	.	.	Higher expression of Rpn4 targets (FDR < 0.05, compared only to stressed cells)	.
BY4741_Stressed_1784042160_C50_BY72	30 min post 0.7M NaCl treatment ('stressed')	135	G1	.	.	.	.
BY4741_Stressed_1784042160_C50_BY80	30 min post 0.7M NaCl treatment ('stressed')	136	M/G1	.	.	.	.
BY4741_Stressed_1784042160_C50_BY38	30 min post 0.7M NaCl treatment ('stressed')	137	S	.	.	.	.
BY4741_Stressed_1784042160_C50_BY66	30 min post 0.7M NaCl treatment ('stressed')	138	unclassified	.	.	.	.
BY4741_Stressed_1784042160_C50_BY12	30 min post 0.7M NaCl treatment ('stressed')	139	unclassified	.	.	.	.
BY4741_Stressed_1784042160_C50_BY56	30 min post 0.7M NaCl treatment ('stressed')	140	unclassified	.	Higher expression of Hsf1 targets (FDR < 0.053, compared only to stressed cells)	.	.
BY4741_Stressed_1784042160_C50_BY33	30 min post 0.7M NaCl treatment ('stressed')	141	G1 entry	.	.	.	.
BY4741_Stressed_1784042160_C50_BY17	30 min post 0.7M NaCl treatment ('stressed')	142	M/G1	.	.	.	.
BY4741_Stressed_1784042160_C50_BY81	30 min post 0.7M NaCl treatment ('stressed')	143	unclassified	.	Higher expression of Hsf1 targets (FDR < 0.053, compared only to stressed cells)	.	.
BY4741_Stressed_1784042160_C50_BY58	30 min post 0.7M NaCl treatment ('stressed')	144	unclassified	.	.	.	.
BY4741_Stressed_1784042160_C50_BY64	30 min post 0.7M NaCl treatment ('stressed')	145	unclassified	.	.	.	.
BY4741_Stressed_1784042160_C50_BY4	30 min post 0.7M NaCl treatment ('stressed')	146	M/G1	.	.	.	.
BY4741_Stressed_1784042160_C50_BY15	30 min post 0.7M NaCl treatment ('stressed')	147	G1 DNA replication	.	.	.	.
BY4741_Stressed_1784042160_C50_BY16	30 min post 0.7M NaCl treatment ('stressed')	148	G1 entry	.	.	Higher expression of Rpn4 targets (FDR < 0.05, compared only to stressed cells)	.
BY4741_Stressed_1784042160_C50_BY6	30 min post 0.7M NaCl treatment ('stressed')	149	unclassified	.	.	.	.
BY4741_Stressed_1784042160_C50_BY32	30 min post 0.7M NaCl treatment ('stressed')	150	unclassified	.	.	.	.
BY4741_Stressed_1784042160_C50_BY40	30 min post 0.7M NaCl treatment ('stressed')	151	unclassified	.	.	.	.
BY4741_Stressed_1784042160_C50_BY76	30 min post 0.7M NaCl treatment ('stressed')	152	G1 entry	.	.	.	.
BY4741_Stressed_1784042160_C50_BY25	30 min post 0.7M NaCl treatment ('stressed')	153	unclassified	.	.	.	.
BY4741_Stressed_1784042160_C50_BY61	30 min post 0.7M NaCl treatment ('stressed')	154	unclassified	.	.	.	.
BY4741_Stressed_1784042160_C50_BY60	30 min post 0.7M NaCl treatment ('stressed')	155	unclassified	.	.	.	.
BY4741_Stressed_1784042160_C50_BY83	30 min post 0.7M NaCl treatment ('stressed')	156	unclassified	.	.	.	.
BY4741_Stressed_1784042160_C50_BY24	30 min post 0.7M NaCl treatment ('stressed')	157	G1	.	.	.	.
BY4741_Stressed_1784042160_C50_BY23	30 min post 0.7M NaCl treatment ('stressed')	158	S	.	.	.	.
BY4741_Stressed_1784042160_C50_BY39	30 min post 0.7M NaCl treatment ('stressed')	159	unclassified	.	.	.	.
BY4741_Stressed_1784042160_C50_BY65	30 min post 0.7M NaCl treatment ('stressed')	160	G1	.	.	.	.
BY4741_Stressed_1784042160_C50_BY28	30 min post 0.7M NaCl treatment ('stressed')	161	M/G1	.	.	.	.
BY4741_Stressed_1784042160_C50_BY21	30 min post 0.7M NaCl treatment ('stressed')	162	unclassified	.	.	.	.
BY4741_Stressed_1784042160_C50_BY20	30 min post 0.7M NaCl treatment ('stressed')	163	G1 entry	.	.	.	.
BY4741_Stressed_1784042160_C50_BY67	30 min post 0.7M NaCl treatment ('stressed')	164	M/G1	.	.	Higher expression of Rpn4 targets (FDR < 0.05, compared only to stressed cells)	.
