# Supplementary material for: Single-cell RNA sequencing reveals intrinsic and extrinsic regulatory heterogeneity in yeast responding to stress
Source: PLoS Biol. 2017 Dec 14;15(12):e2004050. doi: 10.1371/journal.pbio.2004050 (PMC5746276; doi:10.1371/journal.pbio.2004050)
Supplement: S11 Table — Nuclear/cytosolic ratios from Cell Profiler are shown for each of two factors as measured in a single strain. Each strain data is shown on a separate tab. TF, transcription factor. (XLSX) [file pbio.2004050.s011.xlsx]

## Sheet: Msn2-Dot6
Msn2-mCherry_nuclei_VS_cytoplasm_median-TIME-0	Msn2-mCherry_nuclei_VS_cytoplasm_median-TIME-5	Msn2-mCherry_nuclei_VS_cytoplasm_median-TIME-10	Msn2-mCherry_nuclei_VS_cytoplasm_median-TIME-15	Msn2-mCherry_nuclei_VS_cytoplasm_median-TIME-20	Msn2-mCherry_nuclei_VS_cytoplasm_median-TIME-25	Msn2-mCherry_nuclei_VS_cytoplasm_median-TIME-30		Dot6-GFP_nuclei_VS_cytoplasm_median-TIME-0	Dot6-GFP_nuclei_VS_cytoplasm_median-TIME-5	Dot6-GFP_nuclei_VS_cytoplasm_median-TIME-10	Dot6-GFP_nuclei_VS_cytoplasm_median-TIME-15	Dot6-GFP_nuclei_VS_cytoplasm_median-TIME-20	Dot6-GFP_nuclei_VS_cytoplasm_median-TIME-25	Dot6-GFP_nuclei_VS_cytoplasm_median-TIME-30
0.824336	2.19437	0.99607	3.30503	0.857714	2.87627	0.957519		2.03357	0.807301	2.26568	0.976785	2.81757	0.965843	2.81285
0.825479	2.14469	1.03946	3.02452	0.870744	2.78767	1.02002		1.62996	0.924285	2.25253	1.00217	2.79854	1.07009	2.75563
0.880343	2.11935	1.07525	2.8835	0.912663	2.64309	1.04002		1.59774	0.931992	2.19201	1.00267	2.63946	1.08675	2.75352
0.888723	2.05841	1.09077	2.80488	0.922032	2.56997	1.05115		1.57796	0.936698	2.17067	1.01095	2.61883	1.09177	2.6565
0.890472	1.95194	1.09193	2.79179	0.922507	2.56934	1.05861		1.54286	0.949771	2.13216	1.03284	2.60687	1.09494	2.6407
0.895274	1.93136	1.11817	2.76344	0.962199	2.56469	1.06323		1.52499	0.950225	2.13153	1.04839	2.59068	1.10849	2.63416
0.904533	1.9256	1.12333	2.74199	0.963928	2.54857	1.06629		1.5193	0.951868	2.13008	1.07799	2.55346	1.12033	2.61819
0.905569	1.91164	1.12557	2.73623	0.99234	2.52999	1.07251		1.50878	0.953713	2.10371	1.09646	2.54577	1.14296	2.60296
0.909606	1.88534	1.15544	2.73248	0.999762	2.5253	1.07834		1.4934	0.968777	2.06987	1.10633	2.51556	1.14435	2.57917
0.910426	1.86016	1.16247	2.69424	1.00158	2.51045	1.07928		1.46891	0.973075	2.06056	1.11615	2.49054	1.15912	2.57795
0.914031	1.85658	1.18967	2.67861	1.0055	2.49978	1.09199		1.44125	0.974278	2.05769	1.1228	2.48821	1.1723	2.57557
0.920839	1.84181	1.19098	2.67329	1.01974	2.49715	1.09592		1.43962	0.979004	2.05388	1.13358	2.45995	1.19701	2.54171
0.92162	1.83208	1.19641	2.67313	1.02085	2.49564	1.12455		1.43692	0.980027	2.04355	1.1428	2.44589	1.19938	2.53415
0.922599	1.81223	1.21571	2.66739	1.02513	2.47958	1.13		1.42126	0.980768	2.04301	1.14375	2.43464	1.19968	2.5253
0.924991	1.80962	1.22384	2.64364	1.02724	2.47081	1.13119		1.41923	0.987745	2.03575	1.14551	2.42711	1.20467	2.52201
0.92797	1.80124	1.22931	2.62924	1.04598	2.45761	1.13549		1.41634	0.988591	2.01991	1.14596	2.42011	1.24865	2.5106
0.928265	1.7967	1.24029	2.5744	1.05893	2.43393	1.13845		1.41296	0.990709	2.00565	1.14906	2.41982	1.24899	2.4971
0.930887	1.79392	1.24037	2.55697	1.06647	2.42834	1.1394		1.40798	0.992757	2.00454	1.16109	2.41273	1.25538	2.45937
0.930943	1.79015	1.24212	2.55478	1.07168	2.4152	1.14128		1.40561	0.999227	1.99256	1.17037	2.40149	1.25725	2.45249
0.933181	1.78107	1.24221	2.54132	1.09099	2.40915	1.1438		1.39792	1.00019	1.99085	1.1706	2.40079	1.26693	2.44962
0.939868	1.7723	1.24644	2.53713	1.10048	2.40839	1.14959		1.38697	1.00923	1.95889	1.1794	2.39054	1.26811	2.4463
0.942027	1.77148	1.25049	2.5304	1.10068	2.39332	1.15054		1.3749	1.01108	1.95465	1.18089	2.38851	1.26993	2.43829
0.942925	1.76377	1.25095	2.5087	1.11394	2.38289	1.15709		1.36636	1.01176	1.95175	1.18225	2.387	1.27544	2.43455
0.943956	1.75895	1.25329	2.50832	1.11464	2.37369	1.16248		1.35834	1.01338	1.94717	1.18232	2.37953	1.2773	2.43223
0.944959	1.75477	1.25358	2.50664	1.12373	2.35595	1.16336		1.35584	1.01687	1.9444	1.18495	2.37905	1.28006	2.40127
0.945974	1.75246	1.25788	2.50498	1.12936	2.35517	1.18356		1.35504	1.02091	1.94196	1.18953	2.37783	1.28461	2.39864
0.946163	1.75216	1.26182	2.49363	1.1338	2.3485	1.18656		1.35146	1.02176	1.93611	1.19414	2.37092	1.28705	2.3721
0.946445	1.73747	1.2677	2.48014	1.16154	2.33958	1.1869		1.34307	1.02646	1.9261	1.1946	2.37054	1.29157	2.37068
0.946902	1.73698	1.26985	2.47873	1.16192	2.33416	1.1919		1.33233	1.02935	1.9159	1.19678	2.35869	1.29546	2.36828
0.952037	1.72724	1.27066	2.47617	1.18739	2.33262	1.19743		1.32726	1.03095	1.9068	1.20774	2.35067	1.29579	2.36735
0.952252	1.72575	1.27199	2.4696	1.19748	2.33083	1.20025		1.32481	1.0316	1.8999	1.20853	2.3483	1.29605	2.35881
0.953764	1.72466	1.27514	2.46943	1.19795	2.32575	1.20551		1.31335	1.0334	1.89758	1.2087	2.34245	1.29774	2.35358
0.95717	1.72255	1.27787	2.46617	1.20622	2.32367	1.20811		1.29324	1.03378	1.89259	1.20935	2.33548	1.30808	2.33752
0.957283	1.72071	1.27851	2.46368	1.2066	2.31994	1.20822		1.29117	1.03414	1.89056	1.2118	2.33217	1.31335	2.3361
0.957568	1.71215	1.27942	2.45855	1.20725	2.3183	1.21122		1.28373	1.03621	1.89008	1.22145	2.3311	1.31388	2.33055
0.958881	1.70641	1.28355	2.45623	1.20834	2.31454	1.21398		1.27921	1.0365	1.88217	1.2326	2.32132	1.31666	2.3225
0.959842	1.70544	1.28378	2.45252	1.21044	2.30593	1.22597		1.27662	1.03767	1.8777	1.23749	2.31707	1.31838	2.32215
0.959851	1.70193	1.2869	2.45056	1.21755	2.30569	1.22862		1.27296	1.03866	1.87636	1.23905	2.3121	1.32185	2.31755
0.960307	1.69999	1.28779	2.44727	1.24782	2.30565	1.22889		1.27286	1.03989	1.87009	1.24114	2.30888	1.32436	2.30242
0.960813	1.69951	1.2883	2.44018	1.25058	2.29803	1.23308		1.27029	1.04002	1.86935	1.24374	2.30747	1.32818	2.29673
0.96097	1.69935	1.29005	2.43549	1.25712	2.28956	1.24588		1.26825	1.04165	1.86566	1.24817	2.30351	1.32945	2.29316
0.961812	1.68544	1.2986	2.41672	1.26113	2.28104	1.25215		1.26189	1.04235	1.85984	1.24914	2.29359	1.33664	2.28908
0.962275	1.68134	1.30021	2.41413	1.26184	2.2739	1.25444		1.26178	1.04241	1.85873	1.25217	2.28717	1.34011	2.28856
0.962587	1.67813	1.30095	2.41319	1.26239	2.2641	1.25532		1.25728	1.04305	1.85372	1.25342	2.27962	1.34163	2.28846
0.963268	1.67736	1.30373	2.4129	1.26652	2.25346	1.25664		1.25657	1.04373	1.84919	1.25635	2.27643	1.3574	2.27407
0.963858	1.67631	1.30432	2.40676	1.27356	2.24075	1.26101		1.25555	1.04388	1.84625	1.26108	2.27416	1.35927	2.2707
0.964061	1.67481	1.30537	2.40232	1.27809	2.23937	1.27414		1.24909	1.04439	1.83192	1.26119	2.27287	1.36576	2.26255
0.964886	1.67327	1.30641	2.39503	1.27941	2.23609	1.27503		1.24288	1.04459	1.82986	1.26408	2.2706	1.36601	2.26237
0.966983	1.66623	1.30654	2.38946	1.27985	2.2355	1.27584		1.2415	1.04678	1.82725	1.26439	2.27021	1.36747	2.25617
0.970058	1.66558	1.30811	2.37464	1.28235	2.23096	1.27766		1.2389	1.04881	1.8254	1.27342	2.26929	1.3707	2.24411
0.971035	1.66226	1.3116	2.367	1.2831	2.23002	1.27987		1.23709	1.05102	1.82351	1.28027	2.25779	1.37441	2.24146
0.972102	1.66212	1.31647	2.36663	1.29055	2.22602	1.29049		1.23602	1.05256	1.82247	1.28518	2.25492	1.38119	2.23637
0.973278	1.65712	1.31922	2.36023	1.2923	2.2214	1.29455		1.23511	1.05346	1.82204	1.28931	2.25178	1.38239	2.23256
0.97343	1.65537	1.32043	2.35749	1.29336	2.22033	1.29612		1.23372	1.05433	1.81756	1.2922	2.24994	1.38315	2.21223
0.973657	1.64947	1.32279	2.35367	1.29809	2.22003	1.29659		1.233	1.05571	1.81667	1.29298	2.24124	1.3843	2.20768
0.976993	1.64881	1.32336	2.34503	1.3018	2.21858	1.3013		1.23036	1.0584	1.81558	1.29442	2.23705	1.39403	2.20758
0.979144	1.64387	1.32439	2.33765	1.30215	2.2164	1.3033		1.23032	1.059	1.81257	1.29782	2.23355	1.40187	2.20113
0.979419	1.64355	1.32761	2.33565	1.31411	2.21433	1.30621		1.22268	1.05946	1.80368	1.29802	2.23306	1.40352	2.19901
0.97961	1.63712	1.32853	2.33273	1.31793	2.21377	1.30827		1.22237	1.06185	1.80243	1.30898	2.23244	1.40384	2.19814
0.979633	1.63687	1.32886	2.327	1.32144	2.20912	1.30898		1.21919	1.06215	1.80204	1.31101	2.23179	1.40512	2.19635
0.979682	1.63535	1.32944	2.32482	1.32203	2.20883	1.32042		1.21681	1.06244	1.79955	1.31246	2.2296	1.40574	2.1947
0.979927	1.63308	1.33031	2.3233	1.32542	2.2083	1.32047		1.2154	1.06328	1.79945	1.31579	2.22907	1.40623	2.19178
0.980343	1.63212	1.33335	2.31395	1.3279	2.20586	1.32248		1.21443	1.06519	1.79857	1.31915	2.22871	1.40945	2.18921
0.980731	1.63008	1.33508	2.31206	1.3296	2.1907	1.32276		1.21434	1.06525	1.79748	1.31977	2.22655	1.41873	2.1878
0.980755	1.62989	1.33591	2.31164	1.32986	2.18956	1.32672		1.21331	1.06859	1.7962	1.3216	2.2192	1.43922	2.18563
0.981568	1.6298	1.33675	2.31092	1.33433	2.1886	1.33349		1.21076	1.06923	1.79215	1.32346	2.21915	1.4404	2.18423
0.982023	1.62734	1.34024	2.31005	1.33681	2.18003	1.33507		1.20974	1.07008	1.78708	1.32376	2.21882	1.44572	2.18297
0.982808	1.62329	1.3406	2.30835	1.34157	2.16573	1.33888		1.20847	1.07089	1.78693	1.32876	2.21498	1.45695	2.18174
0.982833	1.62187	1.34084	2.30824	1.35274	2.16202	1.33948		1.2084	1.07222	1.78608	1.33093	2.21364	1.4576	2.18082
0.983189	1.62166	1.34251	2.30431	1.35672	2.15325	1.34623		1.2076	1.07233	1.78477	1.33194	2.20581	1.45963	2.17681
0.983257	1.62162	1.34755	2.30161	1.35893	2.15116	1.35126		1.20258	1.07464	1.77962	1.33665	2.20578	1.46008	2.1737
0.984153	1.61935	1.34897	2.30087	1.35987	2.14827	1.35281		1.20181	1.07513	1.77953	1.34083	2.19747	1.46377	2.16983
0.987817	1.6174	1.35199	2.29958	1.36353	2.14622	1.35689		1.19838	1.07534	1.77472	1.34542	2.19383	1.46629	2.16632
0.987932	1.61583	1.35383	2.29903	1.3647	2.14509	1.36135		1.19764	1.07703	1.76045	1.34761	2.18864	1.47002	2.16037
0.988066	1.61524	1.35437	2.29749	1.37232	2.1421	1.36295		1.19605	1.07755	1.75233	1.34851	2.18121	1.47118	2.15209
0.990211	1.61181	1.3589	2.2921	1.37339	2.14139	1.3649		1.19489	1.07846	1.75155	1.3487	2.17907	1.48229	2.14413
0.990389	1.61114	1.35934	2.29193	1.37404	2.14138	1.36645		1.19275	1.07916	1.75043	1.34981	2.17563	1.48705	2.14129
0.990445	1.60987	1.35987	2.29116	1.37464	2.13715	1.37021		1.19208	1.07947	1.74827	1.34992	2.17099	1.48937	2.13825
0.992268	1.6091	1.36069	2.29114	1.37614	2.13353	1.38137		1.18997	1.07947	1.74485	1.35064	2.17078	1.49484	2.13702
0.997691	1.60766	1.36377	2.29076	1.37675	2.1313	1.38475		1.18945	1.0801	1.74068	1.35174	2.16335	1.49766	2.13686
0.998201	1.60398	1.36393	2.28869	1.37908	2.1268	1.38547		1.18916	1.08131	1.74046	1.35284	2.15653	1.50092	2.13451
0.99843	1.60357	1.37023	2.28788	1.37921	2.12008	1.38837		1.18852	1.0842	1.73722	1.35445	2.15579	1.50137	2.13322
0.998859	1.60323	1.37114	2.28715	1.3796	2.11884	1.39597		1.18827	1.08431	1.7362	1.35574	2.1538	1.50345	2.13315
0.999148	1.60018	1.37492	2.28559	1.38103	2.11473	1.39806		1.18759	1.08457	1.73469	1.35705	2.14851	1.50389	2.12727
0.999489	1.59887	1.37555	2.28479	1.38371	2.11145	1.39956		1.1856	1.08479	1.73334	1.36027	2.14358	1.5047	2.12724
0.999566	1.59735	1.37797	2.28087	1.38392	2.11038	1.40069		1.18397	1.08491	1.72932	1.36163	2.14236	1.50527	2.12327
0.999725	1.59532	1.37815	2.28073	1.38438	2.10984	1.40123		1.18318	1.08681	1.72687	1.36362	2.141	1.50559	2.12171
0.999766	1.59304	1.38707	2.2784	1.39049	2.10972	1.40183		1.1819	1.0888	1.72507	1.36393	2.14082	1.50894	2.12121
0.999999	1.59284	1.38988	2.27712	1.39085	2.10748	1.40259		1.1817	1.0895	1.72401	1.36453	2.13696	1.51033	2.11991
1.0001	1.58753	1.3963	2.27209	1.39185	2.10678	1.40398		1.18162	1.08988	1.72199	1.36522	2.13683	1.51085	2.11739
1.00019	1.58667	1.39695	2.2705	1.39301	2.09778	1.40588		1.18162	1.09009	1.71593	1.36547	2.13683	1.51114	2.11545
1.00028	1.58641	1.39765	2.26878	1.39376	2.09521	1.40719		1.18139	1.09047	1.71444	1.36661	2.13674	1.51153	2.1153
1.00089	1.58621	1.39783	2.26735	1.39563	2.08961	1.40854		1.17843	1.09053	1.71255	1.36847	2.134	1.51671	2.11276
1.00105	1.58354	1.40057	2.2624	1.39654	2.08794	1.4117		1.17798	1.09076	1.71173	1.36893	2.12961	1.51743	2.11166
1.00134	1.58255	1.4012	2.25639	1.39856	2.08592	1.41768		1.17792	1.09151	1.7085	1.37054	2.12849	1.5183	2.10837
1.00289	1.58199	1.40299	2.25638	1.40817	2.08504	1.42376		1.17679	1.09188	1.7057	1.37117	2.1268	1.51974	2.10239
1.00311	1.58033	1.40429	2.25379	1.40924	2.07259	1.43228		1.17459	1.09312	1.70107	1.37257	2.12517	1.52223	2.09953
1.00786	1.57755	1.40448	2.24634	1.4095	2.06991	1.43373		1.17207	1.09476	1.70104	1.37343	2.1205	1.52372	2.09447
1.00921	1.57745	1.40478	2.2454	1.41062	2.06948	1.43442		1.17031	1.09494	1.70004	1.37412	2.11864	1.52395	2.0939
1.0099	1.5768	1.40686	2.24494	1.41514	2.06368	1.43497		1.17017	1.09629	1.69905	1.37503	2.11792	1.52966	2.0936
1.01073	1.57509	1.40757	2.24267	1.41653	2.05803	1.43537		1.16974	1.09637	1.69063	1.37513	2.11764	1.53031	2.09204
1.01207	1.57468	1.41138	2.24226	1.41795	2.05782	1.43677		1.16929	1.10014	1.68993	1.37794	2.11667	1.53237	2.08961
1.0152	1.57418	1.41187	2.24118	1.42066	2.05635	1.44194		1.16901	1.10069	1.68779	1.37917	2.10839	1.53308	2.08722
1.01535	1.57405	1.41251	2.23928	1.42118	2.05478	1.44559		1.16841	1.10093	1.68409	1.37918	2.10652	1.53781	2.08691
1.01712	1.57359	1.41289	2.23882	1.42373	2.05449	1.44767		1.16558	1.10368	1.68178	1.38026	2.10435	1.53897	2.08478
1.01733	1.57203	1.41358	2.23672	1.42435	2.0501	1.44983		1.16447	1.10433	1.68154	1.38229	2.09881	1.5406	2.08411
1.01744	1.5717	1.4151	2.235	1.42609	2.04587	1.45034		1.16419	1.1056	1.68139	1.3848	2.09411	1.54181	2.08195
1.01756	1.57099	1.41945	2.23343	1.42702	2.03423	1.45051		1.16268	1.10577	1.67986	1.39393	2.0879	1.54503	2.07709
1.01792	1.57035	1.41986	2.23001	1.42889	2.03408	1.45626		1.16258	1.10684	1.67944	1.39479	2.08616	1.54591	2.07674
1.01814	1.5703	1.42037	2.23	1.4313	2.02444	1.45672		1.16149	1.10716	1.67867	1.39631	2.08578	1.54833	2.07547
1.01821	1.57014	1.42579	2.22514	1.43621	2.02047	1.46157		1.16138	1.10794	1.67821	1.39723	2.08366	1.55256	2.07492
1.01866	1.56542	1.42609	2.22358	1.43703	2.01679	1.46163		1.15986	1.10884	1.67673	1.39983	2.08358	1.55353	2.06639
1.01904	1.56392	1.4265	2.22132	1.43737	2.01663	1.46641		1.1588	1.10912	1.67641	1.40378	2.07988	1.55851	2.06432
1.01977	1.55969	1.42662	2.21871	1.43909	2.01529	1.46694		1.15871	1.10969	1.6712	1.40515	2.07859	1.56243	2.06238
1.01993	1.55711	1.42792	2.21841	1.43942	2.00508	1.46998		1.15779	1.11366	1.67105	1.4077	2.07556	1.57225	2.06157
1.01996	1.5562	1.42902	2.21808	1.44024	2.00464	1.47254		1.15583	1.11446	1.67082	1.40826	2.0739	1.57428	2.05839
1.02014	1.55599	1.43176	2.21663	1.44027	2.00343	1.47356		1.15509	1.11477	1.67059	1.40972	2.07169	1.57437	2.0574
1.02104	1.55591	1.43277	2.21422	1.44104	2.00286	1.47385		1.15501	1.11487	1.66723	1.41168	2.07024	1.57844	2.05044
1.02156	1.55506	1.43514	2.21277	1.44549	2.00242	1.47716		1.15473	1.11569	1.66674	1.4117	2.07006	1.58024	2.05004
1.0218	1.55243	1.43521	2.21035	1.44587	1.99514	1.47811		1.14728	1.11831	1.66646	1.41506	2.06618	1.58235	2.04989
1.02258	1.55169	1.43553	2.21031	1.44618	1.99395	1.47997		1.14679	1.11942	1.66419	1.41609	2.0635	1.58311	2.04907
1.02362	1.55004	1.43601	2.20779	1.44654	1.98942	1.48009		1.1443	1.11953	1.65778	1.41883	2.06027	1.58515	2.04879
1.02397	1.54702	1.43782	2.20651	1.4486	1.98823	1.48022		1.14405	1.12018	1.65684	1.4194	2.05826	1.58588	2.04258
1.0258	1.54594	1.43848	2.20575	1.45656	1.98602	1.48123		1.1438	1.1202	1.6564	1.42029	2.05733	1.58732	2.04255
1.02692	1.54342	1.4406	2.20316	1.4585	1.98573	1.4861		1.14211	1.12067	1.65633	1.42165	2.05713	1.58757	2.04165
1.02744	1.54074	1.44104	2.20157	1.45871	1.97895	1.48754		1.14007	1.12207	1.65043	1.42247	2.05487	1.58819	2.03642
1.02857	1.53923	1.4426	2.19657	1.45894	1.97576	1.48784		1.13918	1.12286	1.64857	1.42308	2.05303	1.58931	2.03551
1.02889	1.53884	1.44386	2.19515	1.46104	1.97535	1.48883		1.13687	1.12301	1.64803	1.42394	2.04742	1.59477	2.02953
1.02928	1.53784	1.44631	2.19425	1.46427	1.97373	1.49081		1.13555	1.12322	1.64798	1.42656	2.04655	1.60137	2.02882
1.03055	1.53596	1.44789	2.19298	1.46497	1.97327	1.49283		1.13518	1.12639	1.64535	1.42736	2.04544	1.60147	2.02628
1.03064	1.53588	1.44835	2.19178	1.4655	1.97295	1.49469		1.13465	1.1269	1.64532	1.42834	2.04295	1.60328	2.02561
1.03144	1.53536	1.45126	2.18905	1.46988	1.97104	1.49473		1.13351	1.12717	1.64072	1.43011	2.04283	1.60449	2.0247
1.03152	1.531	1.45143	2.18853	1.47068	1.96654	1.49518		1.13246	1.12827	1.63859	1.43016	2.04188	1.6065	2.02192
1.03155	1.52814	1.45173	2.18821	1.47113	1.96603	1.49557		1.13183	1.12872	1.63755	1.43057	2.04118	1.61017	2.02015
1.03185	1.52721	1.45182	2.1869	1.47295	1.96177	1.49588		1.13159	1.12878	1.63688	1.43101	2.03716	1.61025	2.01964
1.03361	1.52632	1.46135	2.18514	1.47302	1.96134	1.49659		1.13145	1.1289	1.63349	1.43126	2.0363	1.6119	2.01032
1.03364	1.52611	1.46499	2.17755	1.48155	1.95789	1.49773		1.13108	1.12922	1.62907	1.43204	2.03371	1.61209	2.00744
1.03481	1.52543	1.46633	2.17582	1.4838	1.95759	1.50269		1.13052	1.13091	1.62902	1.43279	2.02945	1.61422	2.00324
1.03532	1.52533	1.46801	2.17344	1.486	1.95543	1.50418		1.12839	1.1316	1.62792	1.43473	2.02943	1.6154	2.00312
1.0363	1.52415	1.46878	2.16801	1.48842	1.95285	1.50497		1.12686	1.13167	1.62709	1.44265	2.02474	1.61823	2.00171
1.03657	1.52389	1.4695	2.16709	1.48844	1.94843	1.50912		1.12636	1.13197	1.627	1.44334	2.02358	1.6216	1.99873
1.03694	1.52297	1.47037	2.16649	1.49049	1.94201	1.51114		1.12631	1.13233	1.62688	1.44815	2.02164	1.62164	1.99812
1.03726	1.52195	1.47069	2.1663	1.49058	1.93934	1.51183		1.12601	1.13358	1.6251	1.45145	2.0191	1.62359	1.99714
1.03749	1.52101	1.4713	2.16427	1.49086	1.93909	1.51198		1.12541	1.13437	1.62412	1.45342	2.019	1.62389	1.99073
1.03805	1.51761	1.47391	2.15523	1.49212	1.93616	1.51237		1.12507	1.13489	1.62169	1.45499	2.01774	1.6316	1.98773
1.03817	1.51671	1.47699	2.15417	1.49311	1.9294	1.51268		1.12422	1.13597	1.62153	1.4675	2.01659	1.63168	1.98743
1.03879	1.51669	1.47841	2.1533	1.49532	1.92772	1.51391		1.12165	1.13631	1.61998	1.46778	2.01597	1.63314	1.98545
1.03932	1.51606	1.47935	2.15303	1.49598	1.92432	1.51858		1.11954	1.13636	1.6192	1.4694	2.01589	1.63637	1.98303
1.0394	1.51573	1.47953	2.15236	1.4982	1.92189	1.51881		1.11934	1.13669	1.61801	1.46948	2.01567	1.63906	1.98043
1.03959	1.51506	1.47978	2.15123	1.49866	1.92182	1.51909		1.11929	1.13678	1.61746	1.46993	2.0147	1.64104	1.97891
1.03998	1.51468	1.48044	2.15079	1.5015	1.91755	1.5193		1.11813	1.13684	1.61635	1.47019	2.01339	1.64104	1.97887
1.04017	1.51445	1.48155	2.15076	1.50361	1.91398	1.52263		1.1178	1.13847	1.61612	1.47044	2.01235	1.64832	1.97648
1.04046	1.51438	1.4819	2.15054	1.50742	1.91359	1.52361		1.11772	1.13868	1.61441	1.47375	2.01159	1.64854	1.97526
1.04059	1.51396	1.48318	2.15031	1.51049	1.91315	1.52466		1.1169	1.1391	1.61387	1.47415	2.0113	1.6494	1.97262
1.04098	1.51313	1.48504	2.14905	1.51065	1.91303	1.52851		1.11682	1.14019	1.61347	1.47441	2.00732	1.64952	1.96863
1.04223	1.51296	1.4856	2.14626	1.51138	1.91225	1.53009		1.11566	1.1412	1.61328	1.47513	1.99877	1.65118	1.9686
1.04236	1.5114	1.4874	2.14456	1.51241	1.90846	1.53032		1.1149	1.14124	1.61172	1.47559	1.99862	1.66191	1.9661
1.04246	1.51069	1.48908	2.14439	1.51263	1.90762	1.5315		1.11377	1.14134	1.60487	1.47574	1.99592	1.6643	1.96523
1.04266	1.5104	1.4893	2.13789	1.51379	1.90425	1.53588		1.11293	1.1414	1.60391	1.4778	1.99586	1.66448	1.96113
1.04289	1.50917	1.49005	2.13515	1.51487	1.90396	1.53696		1.11241	1.14268	1.60332	1.47876	1.99452	1.66501	1.9605
1.04581	1.50866	1.49149	2.13273	1.51599	1.90347	1.53802		1.11186	1.14627	1.59943	1.4797	1.99119	1.6672	1.9604
1.04787	1.50866	1.49198	2.13109	1.5175	1.90197	1.53834		1.11152	1.1463	1.59938	1.4799	1.98662	1.66762	1.96037
1.04799	1.50835	1.49213	2.12996	1.51848	1.90182	1.53979		1.11081	1.14663	1.59665	1.48092	1.98433	1.66763	1.95937
1.04895	1.50791	1.49337	2.12728	1.51893	1.89829	1.54061		1.10981	1.14925	1.59493	1.48148	1.98402	1.66798	1.95224
1.0499	1.50789	1.49351	2.12191	1.51949	1.89673	1.54824		1.1081	1.14947	1.59473	1.48182	1.9834	1.67015	1.95127
1.05064	1.50771	1.49393	2.12023	1.52208	1.89404	1.55021		1.10794	1.14952	1.59345	1.48182	1.98281	1.67268	1.95094
1.05143	1.50735	1.49406	2.11874	1.52218	1.89303	1.55261		1.10683	1.14995	1.59342	1.48373	1.98275	1.67314	1.95026
1.05204	1.50677	1.49428	2.11851	1.52389	1.89093	1.5532		1.10363	1.15004	1.59158	1.48379	1.98102	1.67323	1.94828
1.0521	1.50638	1.4974	2.11805	1.5246	1.8857	1.55431		1.10357	1.15069	1.59091	1.48547	1.97834	1.67376	1.9478
1.05229	1.50425	1.49742	2.11804	1.52466	1.88354	1.55592		1.10343	1.15106	1.58982	1.48602	1.97807	1.67384	1.94654
1.05233	1.50188	1.49815	2.11449	1.52674	1.88246	1.55612		1.10214	1.15118	1.58929	1.48806	1.97661	1.67487	1.93507
1.05343	1.50097	1.49895	2.11437	1.52698	1.8822	1.55653		1.10153	1.1514	1.58917	1.48937	1.97604	1.6749	1.93383
1.05354	1.49896	1.50046	2.11329	1.52764	1.88115	1.56065		1.10131	1.15148	1.58795	1.48973	1.97595	1.67523	1.93142
1.0565	1.4975	1.50626	2.11213	1.52988	1.87368	1.56616		1.09997	1.15164	1.58456	1.49022	1.97336	1.67712	1.93104
1.0572	1.4971	1.50702	2.11145	1.53092	1.86376	1.57163		1.0999	1.15235	1.58367	1.49242	1.97285	1.68023	1.92685
1.05745	1.49702	1.5084	2.10506	1.53098	1.86029	1.57285		1.09943	1.15378	1.58363	1.4938	1.97168	1.6824	1.9244
1.05883	1.49651	1.50983	2.10231	1.53265	1.85827	1.57393		1.09907	1.15382	1.5808	1.49401	1.96971	1.68253	1.92175
1.06043	1.49603	1.51067	2.10182	1.53336	1.85526	1.57423		1.09778	1.15403	1.57996	1.49462	1.96464	1.68302	1.92016
1.06049	1.49227	1.5108	2.101	1.53536	1.85344	1.57778		1.09366	1.15456	1.5785	1.49478	1.96198	1.68452	1.9199
1.06063	1.48894	1.51352	2.09996	1.53717	1.852	1.57837		1.0919	1.15535	1.57412	1.49619	1.96139	1.68484	1.91457
1.06091	1.48847	1.51448	2.09739	1.53927	1.8495	1.57855		1.09143	1.15605	1.57376	1.49677	1.96114	1.6889	1.91212
1.06105	1.48816	1.51478	2.09655	1.53951	1.84881	1.58163		1.08955	1.15656	1.57339	1.49771	1.96063	1.68901	1.90722
1.06157	1.48641	1.51589	2.09452	1.54415	1.84705	1.58472		1.08866	1.15693	1.56815	1.49942	1.96046	1.69157	1.90711
1.06288	1.48551	1.5162	2.09373	1.54636	1.8418	1.59103		1.08753	1.15738	1.56581	1.49958	1.95842	1.69192	1.90173
1.06306	1.4845	1.51729	2.09085	1.54673	1.84111	1.59503		1.08703	1.1577	1.56505	1.50224	1.95679	1.69254	1.9015
1.06334	1.48441	1.51734	2.08843	1.54696	1.83969	1.5986		1.08694	1.15772	1.56407	1.50543	1.9557	1.6938	1.90131
1.06762	1.48419	1.51917	2.08816	1.54823	1.83958	1.60033		1.08664	1.1588	1.56387	1.50666	1.95383	1.69505	1.89534
1.06799	1.4827	1.52123	2.08624	1.54888	1.83931	1.60137		1.08604	1.15931	1.56177	1.51046	1.95205	1.70094	1.89151
1.0706	1.48218	1.52174	2.08601	1.55031	1.83672	1.60181		1.086	1.16031	1.56018	1.51268	1.95173	1.70325	1.88726
1.07125	1.48147	1.52254	2.08363	1.55237	1.83122	1.6022		1.08599	1.16076	1.55973	1.51473	1.94954	1.70369	1.88408
1.07496	1.48029	1.52316	2.08228	1.55241	1.83105	1.60383		1.08493	1.16257	1.55814	1.51547	1.94776	1.71022	1.88405
1.07595	1.47953	1.52495	2.08078	1.5526	1.831	1.6066		1.08479	1.16286	1.5571	1.51588	1.94727	1.71042	1.88236
1.07792	1.47949	1.52515	2.07931	1.55316	1.83036	1.60864		1.08459	1.16392	1.55701	1.5197	1.94647	1.71431	1.88233
1.07795	1.47922	1.52584	2.07858	1.55318	1.82628	1.60871		1.08458	1.1642	1.55574	1.51987	1.94601	1.71481	1.88172
1.07821	1.47754	1.5261	2.07822	1.55321	1.82559	1.61148		1.08393	1.16501	1.55558	1.52066	1.93879	1.71544	1.87992
1.0792	1.47696	1.52634	2.07725	1.55697	1.82549	1.61207		1.08382	1.16657	1.55301	1.52214	1.93731	1.71594	1.87468
1.0793	1.47673	1.52643	2.07665	1.55916	1.82411	1.61731		1.08236	1.16667	1.55253	1.52263	1.9363	1.72777	1.87198
1.08032	1.47623	1.5275	2.07468	1.55934	1.82369	1.62001		1.08176	1.16674	1.55197	1.52421	1.9361	1.73231	1.87157
1.08315	1.4762	1.52806	2.07409	1.56009	1.82295	1.62223		1.08147	1.16689	1.55144	1.52991	1.93558	1.73452	1.87087
1.08343	1.47553	1.52867	2.0735	1.56016	1.82238	1.62334		1.07983	1.16956	1.55107	1.5308	1.93219	1.7421	1.8695
1.08361	1.47476	1.52993	2.07253	1.56168	1.82232	1.62622		1.07888	1.17017	1.54924	1.53197	1.93192	1.74252	1.86931
1.08365	1.47059	1.53074	2.07236	1.56537	1.82165	1.62684		1.0783	1.17165	1.54769	1.53197	1.93143	1.74395	1.86697
1.08522	1.47001	1.53087	2.07148	1.56579	1.82038	1.63172		1.07767	1.17178	1.54752	1.53214	1.9198	1.74698	1.86413
1.08592	1.46834	1.53371	2.06817	1.5666	1.81979	1.63405		1.07738	1.17223	1.54651	1.53216	1.91946	1.74839	1.86253
1.0867	1.46808	1.53497	2.06612	1.56678	1.81917	1.63472		1.07702	1.17226	1.5462	1.53335	1.91819	1.74909	1.86084
1.09023	1.46684	1.5364	2.06459	1.56714	1.81858	1.63672		1.07587	1.17268	1.54451	1.53388	1.91778	1.74944	1.85837
1.09119	1.46569	1.53727	2.06393	1.56743	1.81587	1.63834		1.0754	1.17282	1.54441	1.53501	1.91418	1.74982	1.85446
1.09359	1.46563	1.53796	2.05955	1.56937	1.81563	1.63849		1.07514	1.17282	1.54276	1.53746	1.9133	1.75219	1.85404
1.09426	1.46522	1.53937	2.05908	1.57105	1.81545	1.63989		1.07464	1.17302	1.54265	1.54006	1.9083	1.75386	1.85213
1.095	1.46505	1.53984	2.05322	1.57189	1.81237	1.6399		1.07347	1.17354	1.53883	1.5401	1.90825	1.75422	1.84958
1.09585	1.4648	1.54178	2.05256	1.57194	1.81184	1.64059		1.07214	1.17384	1.53815	1.54115	1.90791	1.75434	1.84712
1.09691	1.46303	1.54261	2.04768	1.57237	1.80955	1.64138		1.07165	1.1739	1.53694	1.54182	1.9079	1.75438	1.84651
1.10189	1.46249	1.5453	2.04748	1.57241	1.80679	1.64494		1.07147	1.17596	1.53664	1.54207	1.90432	1.76284	1.84197
1.10328	1.46247	1.54882	2.04642	1.57687	1.80602	1.64563		1.07142	1.17694	1.53521	1.54469	1.90179	1.76396	1.84191
1.10565	1.46206	1.54948	2.04449	1.57807	1.8037	1.64744		1.0714	1.17737	1.53418	1.54506	1.90108	1.76496	1.8372
1.10569	1.46119	1.55038	2.04399	1.57925	1.79851	1.64772		1.07079	1.17742	1.53362	1.54775	1.90093	1.76875	1.83627
1.1069	1.45955	1.55252	2.03994	1.58091	1.79842	1.64826		1.07072	1.17762	1.53338	1.54832	1.89938	1.7699	1.83513
1.10762	1.45883	1.55278	2.03977	1.58393	1.79731	1.64923		1.07047	1.17778	1.53328	1.54895	1.89796	1.77668	1.83222
1.11159	1.45881	1.55305	2.03829	1.58564	1.79621	1.65343		1.0704	1.17784	1.53276	1.54947	1.89718	1.77742	1.83099
1.1123	1.45821	1.55519	2.03668	1.5884	1.79596	1.65395		1.06967	1.178	1.53262	1.55155	1.89301	1.77832	1.8246
1.11388	1.45735	1.55877	2.02918	1.58853	1.79423	1.65551		1.06813	1.17898	1.53077	1.55371	1.89117	1.78016	1.82156
1.11501	1.45706	1.55878	2.02687	1.58948	1.79396	1.65644		1.06765	1.1793	1.53024	1.55455	1.89104	1.78259	1.82139
1.11582	1.4565	1.56021	2.02659	1.5912	1.79371	1.6572		1.06761	1.17974	1.5294	1.55491	1.88558	1.78458	1.82003
1.11588	1.45259	1.56021	2.02502	1.59389	1.78832	1.65764		1.06733	1.1803	1.52703	1.55671	1.88537	1.78573	1.81871
1.116	1.45211	1.56127	2.01989	1.59639	1.78594	1.65891		1.06699	1.18049	1.52611	1.55792	1.88506	1.78678	1.81599
1.11694	1.45077	1.56307	2.0196	1.59745	1.78553	1.66333		1.06574	1.18111	1.52521	1.55853	1.88424	1.78794	1.81378
1.11732	1.44961	1.56359	2.01858	1.59963	1.78423	1.66371		1.06528	1.18123	1.52447	1.56002	1.88189	1.78889	1.81368
1.11878	1.44961	1.56373	2.01838	1.60062	1.78082	1.66399		1.06375	1.18144	1.52364	1.56325	1.87931	1.79233	1.81146
1.12013	1.44837	1.56447	2.01816	1.60108	1.77745	1.66447		1.06333	1.18214	1.52277	1.56476	1.87622	1.79937	1.80919
1.12121	1.44822	1.5653	2.01434	1.60506	1.77686	1.6655		1.06321	1.18445	1.52267	1.56517	1.87535	1.79945	1.80789
1.12234	1.44745	1.566	2.01066	1.60835	1.77613	1.66573		1.06245	1.18446	1.5222	1.56631	1.87525	1.80145	1.80747
1.12247	1.44719	1.56645	2.0079	1.60942	1.77594	1.66624		1.06176	1.18493	1.52084	1.56631	1.8745	1.80571	1.80667
1.12301	1.44641	1.56763	2.00722	1.60947	1.77555	1.66791		1.06109	1.1851	1.52048	1.56637	1.87196	1.8067	1.80308
1.12344	1.44602	1.56991	2.006	1.61005	1.77256	1.66902		1.05975	1.1853	1.52022	1.56886	1.87019	1.81258	1.80287
1.12512	1.44582	1.57015	2.00498	1.61135	1.77203	1.67336		1.05879	1.18608	1.51964	1.56905	1.86864	1.81581	1.79933
1.12523	1.44552	1.57132	2.00321	1.61169	1.76861	1.67806		1.05877	1.18624	1.51962	1.56957	1.86806	1.81624	1.79888
1.12576	1.44446	1.57152	2.00159	1.61707	1.7681	1.67926		1.05869	1.18856	1.51954	1.57051	1.86764	1.82243	1.79744
1.126	1.444	1.57158	2.00052	1.61774	1.76666	1.67983		1.05861	1.18946	1.51847	1.57061	1.86697	1.82338	1.79546
1.12623	1.44306	1.57163	2.00037	1.62116	1.76608	1.67999		1.05756	1.18981	1.51788	1.57105	1.8668	1.82758	1.79351
1.12933	1.44217	1.5733	1.99979	1.62167	1.76419	1.68428		1.0572	1.18984	1.51675	1.5718	1.86599	1.82806	1.79278
1.12975	1.44204	1.57445	1.99892	1.6219	1.7636	1.68867		1.0563	1.19026	1.51568	1.57404	1.86324	1.83369	1.79209
1.13254	1.44	1.57452	1.99743	1.62237	1.76201	1.69041		1.05613	1.19028	1.51543	1.57472	1.86198	1.83453	1.79187
1.1335	1.43955	1.57539	1.99628	1.62253	1.76127	1.69082		1.05574	1.1904	1.51351	1.57474	1.85739	1.83793	1.78595
1.13482	1.43867	1.57553	1.99461	1.62296	1.76114	1.69142		1.05518	1.19121	1.51327	1.57509	1.85457	1.83868	1.77955
1.13518	1.43844	1.57876	1.99368	1.62346	1.76063	1.69212		1.05456	1.19196	1.51293	1.5752	1.85295	1.84168	1.77883
1.13867	1.43814	1.57909	1.99059	1.6236	1.75988	1.69517		1.05451	1.19385	1.51201	1.57547	1.85193	1.8426	1.77747
1.14317	1.43672	1.57914	1.99057	1.62584	1.74973	1.69943		1.0534	1.19401	1.51197	1.57565	1.84841	1.84368	1.77498
1.14434	1.43572	1.57981	1.99041	1.62978	1.7459	1.69984		1.05333	1.19494	1.51195	1.5791	1.84791	1.84843	1.77464
1.14475	1.43544	1.58024	1.98971	1.6307	1.74534	1.70011		1.05333	1.19504	1.51173	1.58154	1.84719	1.85056	1.77317
1.14608	1.43487	1.58055	1.9895	1.63227	1.74491	1.70049		1.05264	1.19585	1.51169	1.582	1.84569	1.85544	1.77252
1.14728	1.43413	1.5849	1.97991	1.63229	1.74342	1.70357		1.05136	1.19616	1.5116	1.58268	1.84264	1.86172	1.77237
1.14736	1.43354	1.58526	1.97807	1.6325	1.74336	1.7042		1.05106	1.19636	1.51153	1.58323	1.84182	1.87092	1.77201
1.14744	1.43348	1.58532	1.97755	1.63279	1.74159	1.70625		1.05018	1.19638	1.51142	1.58379	1.84007	1.87114	1.76665
1.14749	1.43303	1.58898	1.97638	1.63468	1.73624	1.70856		1.04997	1.19699	1.51057	1.5851	1.83597	1.87151	1.76637
1.14986	1.42957	1.58941	1.97451	1.6363	1.73297	1.7092		1.04901	1.19709	1.50998	1.5863	1.83543	1.87357	1.76469
1.15016	1.42938	1.59151	1.9742	1.63774	1.73257	1.7121		1.04772	1.19768	1.50886	1.58755	1.83378	1.87736	1.76299
1.15038	1.42895	1.59238	1.97253	1.63776	1.73079	1.71279		1.04767	1.19787	1.50874	1.58814	1.83352	1.88065	1.76212
1.15043	1.4283	1.59269	1.97219	1.63813	1.72845	1.71302		1.04644	1.19882	1.50864	1.59032	1.83217	1.88245	1.7585
1.15121	1.42791	1.59338	1.97042	1.64139	1.72823	1.71366		1.04612	1.19891	1.50814	1.5904	1.83104	1.88452	1.75702
1.15164	1.42716	1.59488	1.96984	1.64191	1.72578	1.71785		1.04502	1.19903	1.50724	1.59118	1.83098	1.88821	1.75679
1.15169	1.42709	1.59589	1.96767	1.64531	1.72479	1.71882		1.04415	1.19954	1.5056	1.5915	1.83029	1.89916	1.75671
1.15215	1.4262	1.59592	1.96756	1.64629	1.72465	1.71966		1.04348	1.19985	1.50556	1.59221	1.82901	1.9024	1.75569
1.15338	1.42566	1.59648	1.96611	1.64696	1.72272	1.72075		1.04344	1.20005	1.50404	1.59282	1.82865	1.90296	1.7555
1.15387	1.42543	1.59677	1.96425	1.64752	1.71949	1.72107		1.04134	1.202	1.50246	1.59376	1.82803	1.9039	1.75196
1.15669	1.42517	1.59885	1.96247	1.64842	1.71864	1.72167		1.03989	1.20209	1.50214	1.59604	1.82795	1.90455	1.74973
1.15682	1.4239	1.59885	1.96209	1.64894	1.71845	1.72416		1.03979	1.20249	1.50158	1.59629	1.82591	1.90459	1.74875
1.15838	1.42306	1.60056	1.96189	1.64992	1.71186	1.72457		1.03936	1.20336	1.50141	1.60169	1.82574	1.90676	1.74746
1.15889	1.42163	1.60171	1.9604	1.65118	1.71135	1.72466		1.03794	1.20392	1.5004	1.60321	1.8252	1.90683	1.74684
1.15911	1.42142	1.6026	1.95819	1.65126	1.70716	1.72883		1.03733	1.20424	1.49926	1.60427	1.82388	1.90805	1.74211
1.16081	1.42101	1.60277	1.95398	1.65193	1.70251	1.73098		1.03643	1.20429	1.49613	1.60665	1.82116	1.90997	1.74069
1.16106	1.41881	1.60458	1.9528	1.65385	1.69949	1.73221		1.03535	1.20517	1.49564	1.60904	1.8208	1.91642	1.73962
1.16286	1.41863	1.6062	1.95148	1.65683	1.69318	1.73722		1.03373	1.2052	1.49555	1.60912	1.82019	1.91688	1.7374
1.16402	1.41862	1.60666	1.95036	1.65712	1.69266	1.73722		1.03367	1.20594	1.49491	1.60922	1.82001	1.92615	1.73639
1.16681	1.41854	1.6074	1.94784	1.65742	1.69256	1.73983		1.03357	1.20693	1.49438	1.60923	1.81954	1.92652	1.73424
1.16715	1.41631	1.60792	1.94353	1.65821	1.69185	1.7403		1.03274	1.20784	1.49419	1.6095	1.81539	1.92712	1.73202
1.16788	1.41619	1.60979	1.94315	1.65832	1.69024	1.74503		1.03201	1.20794	1.49344	1.6101	1.815	1.93079	1.72944
1.16866	1.41238	1.60981	1.93776	1.65842	1.68714	1.74636		1.03171	1.20896	1.49288	1.61015	1.81448	1.93194	1.72824
1.16966	1.41188	1.60984	1.9376	1.65901	1.68612	1.75111		1.03101	1.20971	1.49226	1.61167	1.81345	1.93242	1.7259
1.17019	1.41163	1.61318	1.93373	1.66017	1.68537	1.75227		1.0304	1.20975	1.492	1.61243	1.81292	1.93541	1.72443
1.17095	1.41128	1.61327	1.9324	1.66096	1.68475	1.75234		1.0295	1.21076	1.49118	1.61255	1.81124	1.93826	1.72409
1.17107	1.4103	1.61416	1.93162	1.66155	1.68251	1.753		1.02747	1.21095	1.49091	1.61308	1.81084	1.93841	1.72053
1.17232	1.40868	1.61489	1.93153	1.66167	1.68234	1.75422		1.02735	1.21102	1.49072	1.6137	1.80971	1.9388	1.72018
1.17536	1.40855	1.61493	1.93069	1.66169	1.68171	1.75727		1.02431	1.21112	1.48842	1.61476	1.80571	1.94013	1.71711
1.17716	1.40841	1.61502	1.92952	1.66197	1.68104	1.76274		1.02343	1.21171	1.48787	1.61562	1.8049	1.9438	1.71595
1.17838	1.40777	1.61539	1.92794	1.66218	1.68068	1.76384		1.0231	1.21193	1.48726	1.61565	1.80453	1.94386	1.71402
1.18182	1.4066	1.61561	1.92676	1.66346	1.68033	1.76491		1.02272	1.2123	1.48701	1.61801	1.80415	1.9454	1.71268
1.18705	1.40635	1.61567	1.92668	1.66393	1.68004	1.76629		1.02236	1.21269	1.48643	1.61836	1.80251	1.94562	1.71234
1.18841	1.4046	1.61575	1.92484	1.664	1.67716	1.76695		1.02187	1.21275	1.4855	1.61874	1.7998	1.94628	1.7077
1.19064	1.40344	1.61596	1.92443	1.66487	1.67701	1.76954		1.02159	1.21301	1.48493	1.62156	1.79761	1.94674	1.7073
1.19447	1.4033	1.61681	1.92365	1.66658	1.67503	1.77307		1.02145	1.21322	1.48374	1.62201	1.79591	1.95076	1.70505
1.19792	1.40296	1.61735	1.92247	1.6686	1.67313	1.77529		1.01985	1.21364	1.48349	1.62285	1.7923	1.95259	1.69643
1.19877	1.40244	1.618	1.92197	1.66893	1.67267	1.7761		1.01975	1.21428	1.48301	1.62327	1.79099	1.95311	1.69483
1.19957	1.40242	1.62052	1.92192	1.66956	1.67176	1.77652		1.01959	1.21506	1.48145	1.62631	1.79082	1.95369	1.69169
1.19979	1.4019	1.62128	1.92146	1.67061	1.67071	1.77932		1.01924	1.21522	1.47977	1.63196	1.7869	1.95485	1.68689
1.19989	1.40154	1.62276	1.92101	1.67183	1.67014	1.78429		1.0185	1.21534	1.47952	1.63204	1.78641	1.95944	1.68572
1.20003	1.4014	1.62325	1.92095	1.67247	1.66679	1.78583		1.01838	1.21578	1.47608	1.63286	1.78488	1.96245	1.68481
1.20014	1.40014	1.62326	1.9195	1.67285	1.66452	1.78814		1.01835	1.21624	1.47601	1.63363	1.77116	1.96245	1.68337
1.2008	1.39947	1.62373	1.9179	1.67641	1.66382	1.78815		1.01833	1.21683	1.47592	1.63382	1.77045	1.96422	1.68086
1.20863	1.39898	1.62526	1.91641	1.67742	1.66043	1.7891		1.01763	1.21695	1.47568	1.6341	1.76993	1.96673	1.67712
1.20977	1.39833	1.62615	1.91549	1.67746	1.65994	1.78996		1.0173	1.21766	1.47534	1.63464	1.76934	1.96979	1.67536
1.21113	1.39682	1.62667	1.91506	1.67818	1.6588	1.79123		1.01657	1.21792	1.47403	1.63665	1.76718	1.97665	1.6753
1.21145	1.39568	1.62686	1.91348	1.67898	1.65686	1.79249		1.01134	1.21858	1.47333	1.63722	1.76604	1.97713	1.67323
1.21382	1.3926	1.62728	1.91286	1.68109	1.65626	1.79293		1.01115	1.21975	1.47319	1.63722	1.76497	1.98099	1.6723
1.21686	1.39255	1.62769	1.91274	1.68129	1.65388	1.79485		1.00985	1.21977	1.47037	1.63825	1.76239	1.98215	1.67226
1.21881	1.392	1.62884	1.91173	1.68196	1.65227	1.79583		1.00871	1.21998	1.47036	1.63848	1.76092	1.98607	1.67179
1.21904	1.39075	1.62917	1.91064	1.68361	1.65183	1.79853		1.00853	1.22041	1.4692	1.63854	1.76083	1.98751	1.66178
1.21959	1.39014	1.62924	1.90958	1.68778	1.64955	1.79935		1.0041	1.22044	1.46659	1.63884	1.76041	1.98789	1.66107
1.2198	1.3897	1.6296	1.9095	1.68783	1.64875	1.80622		1.00127	1.22191	1.46566	1.64089	1.75727	1.99088	1.66016
1.22173	1.38958	1.62991	1.90906	1.68952	1.64795	1.80743		1.00122	1.22191	1.46536	1.64297	1.75717	1.99295	1.65994
1.2219	1.38833	1.63038	1.90741	1.69045	1.64581	1.80839		1.00044	1.22234	1.46486	1.64361	1.75655	1.99558	1.65945
1.22604	1.38793	1.63136	1.90732	1.69062	1.6455	1.80873		1.00041	1.22259	1.46472	1.64456	1.75567	1.99627	1.65861
1.22783	1.38745	1.63225	1.90608	1.69107	1.64286	1.81182		1.00024	1.22291	1.46457	1.64566	1.75506	1.99764	1.65672
1.22855	1.38672	1.63263	1.90474	1.69178	1.64226	1.81448		0.999961	1.22298	1.46446	1.64868	1.75343	1.99799	1.65544
1.22855	1.38457	1.63342	1.90472	1.69238	1.64209	1.81682		0.999814	1.22327	1.46376	1.64919	1.7529	2.00185	1.65381
1.23005	1.38175	1.63457	1.90317	1.69246	1.64171	1.81786		0.999799	1.22337	1.46303	1.64948	1.75249	2.00375	1.65193
1.23122	1.38167	1.63568	1.90295	1.69322	1.64132	1.81887		0.999691	1.22374	1.46095	1.64967	1.75209	2.00546	1.6481
1.23954	1.38033	1.63637	1.9019	1.69788	1.64047	1.81984		0.999434	1.22456	1.46077	1.65061	1.75046	2.00676	1.6424
1.24354	1.37895	1.63799	1.89962	1.70019	1.63987	1.82104		0.998989	1.22512	1.46005	1.65094	1.74973	2.0099	1.63892
1.24386	1.3783	1.63985	1.89905	1.70049	1.63837	1.82119		0.998814	1.22521	1.45946	1.6511	1.74797	2.01072	1.63797
1.24964	1.37783	1.64033	1.89863	1.70092	1.63828	1.8328		0.998652	1.22539	1.45907	1.65126	1.74737	2.01473	1.63742
1.25199	1.37694	1.6409	1.89851	1.70097	1.63798	1.83386		0.998189	1.2264	1.45851	1.65128	1.74733	2.02089	1.63461
1.25339	1.3757	1.64132	1.89619	1.70196	1.63321	1.83401		0.995935	1.22671	1.4582	1.65271	1.74472	2.02158	1.63248
1.25613	1.37551	1.64259	1.89597	1.70227	1.62679	1.83691		0.992369	1.22673	1.45698	1.65284	1.74445	2.02358	1.63215
1.25701	1.37534	1.6464	1.89595	1.70585	1.62554	1.83716		0.991021	1.22851	1.45604	1.65481	1.74143	2.02464	1.63169
1.2579	1.37525	1.64725	1.89553	1.70646	1.62428	1.83739		0.990613	1.23005	1.45424	1.65549	1.74112	2.02645	1.63028
1.26009	1.37381	1.64727	1.89404	1.70765	1.62414	1.84015		0.989831	1.23013	1.45421	1.65553	1.73998	2.02705	1.62833
1.26235	1.37374	1.64762	1.8928	1.7094	1.62385	1.84123		0.98723	1.23089	1.45118	1.65611	1.73996	2.02788	1.62266
1.26771	1.37302	1.65038	1.89266	1.70953	1.62381	1.84662		0.985714	1.23134	1.44912	1.65812	1.73971	2.02864	1.62041
1.27366	1.37264	1.65223	1.89198	1.71146	1.62211	1.84709		0.984496	1.23153	1.44853	1.65839	1.73595	2.03143	1.62009
1.2747	1.3721	1.65502	1.89128	1.71224	1.62202	1.84928		0.983619	1.23605	1.44818	1.6601	1.73569	2.03316	1.61877
1.27648	1.37015	1.65634	1.88992	1.71368	1.62137	1.85118		0.983557	1.23614	1.44516	1.66035	1.73138	2.03551	1.61875
1.27793	1.36904	1.65641	1.8898	1.71374	1.62082	1.85593		0.983122	1.23646	1.44499	1.66673	1.73128	2.04037	1.61491
1.27821	1.36879	1.65691	1.88694	1.71546	1.62075	1.85713		0.9831	1.23647	1.44262	1.66686	1.72935	2.04345	1.61405
1.27877	1.36807	1.65729	1.88679	1.71742	1.62015	1.86128		0.983055	1.23652	1.4425	1.66788	1.72641	2.04753	1.61039
1.28296	1.36764	1.65927	1.8853	1.71759	1.61895	1.86232		0.982729	1.2367	1.4418	1.6692	1.72419	2.04785	1.60989
1.28596	1.36703	1.66048	1.88172	1.71805	1.61784	1.86525		0.982652	1.23683	1.43982	1.66934	1.72179	2.04861	1.60834
1.28929	1.36697	1.6612	1.88161	1.71858	1.61686	1.86715		0.982336	1.23738	1.43943	1.66973	1.72099	2.05022	1.60779
1.29285	1.36675	1.66165	1.88121	1.71904	1.61486	1.86992		0.982146	1.23765	1.4378	1.67753	1.72026	2.05318	1.60473
1.29967	1.36537	1.66172	1.8791	1.71976	1.6138	1.87067		0.982023	1.23786	1.43753	1.67861	1.71764	2.0537	1.60401
1.29979	1.36503	1.66384	1.87877	1.72061	1.61282	1.87548		0.982022	1.23835	1.43739	1.68185	1.71759	2.05572	1.60288
1.30015	1.36453	1.6644	1.87866	1.72124	1.61256	1.87676		0.981	1.23985	1.43707	1.68468	1.71693	2.06024	1.60062
1.30243	1.36446	1.66453	1.87619	1.72225	1.60934	1.88283		0.980389	1.2401	1.4366	1.68561	1.71548	2.06706	1.59821
1.31723	1.36423	1.66478	1.87575	1.72263	1.60419	1.88472		0.980254	1.24111	1.43638	1.68627	1.71149	2.0705	1.598
1.3201	1.36423	1.66507	1.87467	1.72375	1.60389	1.88496		0.980235	1.24184	1.43613	1.68637	1.71005	2.07185	1.59138
1.32072	1.36334	1.66529	1.87393	1.72553	1.60228	1.88831		0.978944	1.24208	1.43533	1.69111	1.70965	2.07208	1.59094
1.32819	1.36322	1.6661	1.8728	1.72695	1.59788	1.89078		0.978374	1.24308	1.43468	1.69164	1.70913	2.07303	1.59006
1.32907	1.363	1.66656	1.86952	1.72715	1.59772	1.89795		0.977474	1.24322	1.4338	1.69289	1.70906	2.07598	1.58986
1.33171	1.36284	1.66691	1.86855	1.72863	1.59571	1.89884		0.977152	1.24458	1.4338	1.69313	1.70674	2.07746	1.58844
1.33365	1.36282	1.66909	1.86789	1.7295	1.59477	1.90037		0.976551	1.24508	1.43277	1.69349	1.70581	2.07999	1.58576
1.33427	1.36189	1.67	1.86649	1.73151	1.58718	1.90294		0.974809	1.24548	1.43212	1.6935	1.70505	2.08052	1.58443
1.33903	1.36062	1.67189	1.86648	1.73222	1.58556	1.90463		0.972111	1.2459	1.43164	1.69408	1.70345	2.08093	1.58241
1.34789	1.35984	1.67232	1.86519	1.73347	1.58479	1.90849		0.968967	1.24603	1.42981	1.69456	1.70092	2.08227	1.58212
1.35181	1.35886	1.67312	1.86206	1.73522	1.58473	1.9108		0.967771	1.24736	1.42819	1.69483	1.70091	2.08463	1.57978
1.35675	1.3585	1.67513	1.86149	1.73724	1.58402	1.91221		0.967555	1.24778	1.42667	1.69527	1.69851	2.0878	1.5788
1.35863	1.35747	1.67534	1.86097	1.73744	1.58261	1.91404		0.96631	1.2484	1.42562	1.69664	1.69833	2.08885	1.57832
1.36283	1.35729	1.67607	1.86083	1.73762	1.57908	1.91497		0.966099	1.24941	1.42461	1.70019	1.69767	2.09511	1.5773
1.36451	1.35696	1.67654	1.86062	1.739	1.57528	1.91745		0.960001	1.24945	1.42378	1.70312	1.69535	2.09618	1.57227
1.38335	1.35644	1.67754	1.86027	1.74247	1.5725	1.91869		0.959719	1.24951	1.42354	1.70343	1.69507	2.09648	1.57171
1.38371	1.35525	1.67884	1.86023	1.74531	1.57246	1.91926		0.947247	1.25013	1.42306	1.70435	1.69409	2.09819	1.56962
1.38831	1.35379	1.68048	1.85848	1.74634	1.5719	1.92292		0.946058	1.2536	1.4223	1.70589	1.69111	2.10752	1.56858
1.39567	1.35334	1.68206	1.85814	1.74722	1.57018	1.92958		0.94586	1.25385	1.42165	1.70751	1.69052	2.10904	1.56438
1.41516	1.35312	1.68233	1.85798	1.74774	1.56494	1.93096		0.939262	1.25394	1.41935	1.70866	1.6902	2.10931	1.56189
1.41664	1.3531	1.68561	1.85787	1.7524	1.56028	1.93241		0.939101	1.25411	1.41905	1.70883	1.68988	2.11098	1.56146
1.43793	1.35298	1.68571	1.85716	1.75424	1.55834	1.9365		0.936078	1.25485	1.41886	1.70932	1.68868	2.1117	1.55991
1.45881	1.35142	1.68832	1.85446	1.75469	1.5574	1.93721		0.929625	1.25507	1.41732	1.71312	1.68852	2.1166	1.55893
1.47857	1.3487	1.68952	1.85348	1.75606	1.55736	1.93806		0.926572	1.25584	1.41647	1.71341	1.68821	2.117	1.55876
1.47953	1.34802	1.68957	1.85308	1.75712	1.55702	1.93834		0.922575	1.2564	1.41627	1.71385	1.68542	2.11903	1.55867
1.48417	1.34701	1.69124	1.85194	1.75745	1.55587	1.94504		0.916416	1.25834	1.41494	1.71406	1.68476	2.11959	1.5586
1.55513	1.34516	1.6951	1.84856	1.75961	1.55558	1.94604		0.906564	1.2594	1.4146	1.71515	1.68062	2.12022	1.55806
1.56324	1.3424	1.6954	1.84805	1.76016	1.55532	1.95188		0.901894	1.25986	1.41427	1.7172	1.67981	2.12161	1.54967
1.61811	1.34229	1.69702	1.8439	1.76055	1.55475	1.95244		0.896024	1.26029	1.41384	1.7174	1.67921	2.12563	1.54821
1.63704	1.34146	1.6977	1.8421	1.7607	1.55463	1.95663		0.89063	1.26106	1.41116	1.71918	1.67917	2.12956	1.54492
1.68419	1.34043	1.69945	1.84158	1.76089	1.55414	1.95723		0.884646	1.2612	1.4108	1.72194	1.67846	2.13356	1.54287
1.7399	1.34032	1.69956	1.84076	1.76329	1.55252	1.95758		0.883483	1.26207	1.41035	1.72217	1.67464	2.13992	1.54111
1.78877	1.3393	1.69957	1.83682	1.7642	1.55212	1.96027		0.878102	1.26264	1.40975	1.72257	1.67297	2.1413	1.53938
	1.33916	1.70205	1.83601	1.76441	1.54829	1.96065			1.26342	1.40953	1.72459	1.6726	2.14532	1.53801
	1.33888	1.70284	1.83549	1.76689	1.54766	1.96366			1.26372	1.40826	1.72528	1.67197	2.14773	1.53618
	1.336	1.70326	1.83209	1.76804	1.54745	1.96396			1.26382	1.40815	1.72544	1.67191	2.15238	1.52969
	1.3352	1.70382	1.83138	1.76809	1.546	1.96474			1.26452	1.40752	1.72653	1.67081	2.16298	1.52328
	1.33467	1.70521	1.83078	1.77099	1.54535	1.96476			1.26454	1.40691	1.72669	1.66921	2.16589	1.51638
	1.33319	1.70711	1.83053	1.77407	1.54533	1.96783			1.26475	1.40545	1.727	1.66884	2.16805	1.51538
	1.33293	1.7083	1.82887	1.77444	1.54135	1.9695			1.2653	1.40533	1.72709	1.66762	2.16917	1.51489
	1.33214	1.70882	1.82817	1.77493	1.54029	1.97414			1.2658	1.40282	1.72739	1.665	2.16966	1.5126
	1.33142	1.70985	1.82562	1.77592	1.53631	1.97631			1.26598	1.4021	1.72853	1.66381	2.17088	1.51165
	1.3305	1.7099	1.82516	1.77652	1.53527	1.97727			1.26694	1.39995	1.72888	1.66174	2.17449	1.50719
	1.32996	1.71057	1.82371	1.77799	1.53345	1.97769			1.26728	1.39956	1.73307	1.6615	2.17495	1.50323
	1.32906	1.71198	1.82366	1.77886	1.53101	1.97999			1.26774	1.39854	1.7353	1.6597	2.1769	1.50096
	1.32876	1.71404	1.82337	1.77904	1.52775	1.98332			1.26809	1.39726	1.7361	1.6585	2.17986	1.49584
	1.32849	1.71493	1.82229	1.77978	1.52719	1.98422			1.26879	1.39631	1.73724	1.65797	2.18166	1.49252
	1.32805	1.7151	1.81383	1.78056	1.52646	1.99288			1.26909	1.39512	1.73809	1.65784	2.18696	1.49172
	1.32772	1.71692	1.81308	1.78131	1.51953	1.99812			1.27067	1.39435	1.73963	1.65744	2.18819	1.49125
	1.32764	1.71713	1.81255	1.78164	1.51886	1.99877			1.2719	1.39345	1.74097	1.65617	2.19497	1.4911
	1.32762	1.71939	1.81071	1.78295	1.51807	2.002			1.27191	1.39326	1.74213	1.65555	2.21561	1.49033
	1.32686	1.72126	1.80946	1.78315	1.51796	2.0087			1.27357	1.39249	1.74234	1.6539	2.21803	1.48737
	1.32634	1.72433	1.80537	1.78351	1.51686	2.00908			1.27588	1.39145	1.74275	1.65359	2.21922	1.48712
	1.32524	1.72449	1.80531	1.7842	1.51356	2.01068			1.27612	1.39138	1.74337	1.65154	2.22034	1.48247
	1.32416	1.72488	1.80491	1.78441	1.51294	2.0121			1.27636	1.38878	1.74616	1.65102	2.22238	1.4821
	1.32299	1.72497	1.80433	1.78533	1.51013	2.01483			1.27731	1.3884	1.74831	1.65058	2.23083	1.47501
	1.32255	1.72555	1.80336	1.78678	1.5085	2.01684			1.27839	1.38759	1.74937	1.64996	2.23484	1.47223
	1.32144	1.72634	1.8028	1.78799	1.50778	2.01722			1.27853	1.3874	1.74942	1.64928	2.23509	1.47196
	1.32139	1.72893	1.8022	1.78803	1.50413	2.01723			1.27954	1.38725	1.75184	1.64925	2.23838	1.44988
	1.31949	1.72924	1.80188	1.78944	1.50343	2.02322			1.27963	1.38691	1.75222	1.64451	2.2407	1.44865
	1.3186	1.72966	1.80064	1.79082	1.50189	2.02347			1.28014	1.3866	1.75411	1.64344	2.2415	1.4484
	1.31796	1.73087	1.79749	1.79168	1.50057	2.02414			1.28128	1.38657	1.75687	1.6421	2.24675	1.44779
	1.3174	1.73088	1.79568	1.79183	1.49981	2.03165			1.2825	1.38606	1.75782	1.64139	2.25072	1.44393
	1.31687	1.73205	1.79391	1.79222	1.4973	2.03342			1.28288	1.38603	1.76004	1.64085	2.25534	1.4424
	1.31589	1.73207	1.79245	1.79527	1.4875	2.03946			1.28435	1.38591	1.76041	1.63835	2.25572	1.43874
	1.31588	1.73333	1.78939	1.79956	1.48691	2.04065			1.28648	1.38489	1.76045	1.63578	2.25952	1.4364
	1.31448	1.73454	1.78533	1.80123	1.48683	2.04239			1.28668	1.38476	1.76161	1.63531	2.26493	1.43237
	1.31405	1.73455	1.7849	1.8016	1.48328	2.04264			1.28737	1.38335	1.76268	1.63412	2.2668	1.42989
	1.31063	1.73545	1.78335	1.80295	1.48229	2.0439			1.28754	1.38261	1.7631	1.63406	2.27386	1.42868
	1.30934	1.7356	1.78332	1.8041	1.46905	2.04616			1.2892	1.38251	1.76328	1.62755	2.27391	1.42739
	1.3089	1.73641	1.78331	1.80483	1.46038	2.04741			1.28925	1.38096	1.76366	1.62413	2.27609	1.4252
	1.30777	1.73719	1.78143	1.80951	1.45784	2.04801			1.29059	1.38079	1.76389	1.62408	2.27697	1.42228
	1.30773	1.73743	1.78059	1.8098	1.45422	2.04865			1.29093	1.38009	1.76393	1.61802	2.27857	1.42068
	1.3072	1.73995	1.78051	1.81139	1.45347	2.05157			1.2914	1.37934	1.76553	1.61634	2.27864	1.41537
	1.30638	1.74114	1.78018	1.81411	1.45261	2.05687			1.29161	1.37879	1.76735	1.61586	2.28126	1.41376
	1.3054	1.74227	1.77953	1.818	1.45032	2.06445			1.29257	1.37855	1.76764	1.61585	2.28446	1.41213
	1.30476	1.74404	1.77808	1.82008	1.44999	2.0649			1.29378	1.37849	1.76853	1.6129	2.2896	1.41208
	1.30439	1.74761	1.7779	1.82076	1.44384	2.06674			1.29404	1.37781	1.76972	1.61273	2.29177	1.41194
	1.30419	1.74847	1.77636	1.8232	1.44351	2.06923			1.29455	1.37633	1.77093	1.61096	2.29497	1.4009
	1.30402	1.74918	1.77521	1.8232	1.4405	2.07019			1.29517	1.37628	1.77549	1.6103	2.3002	1.39885
	1.30391	1.74978	1.77488	1.82325	1.43867	2.07033			1.29527	1.37532	1.77585	1.60812	2.30261	1.39554
	1.30362	1.75191	1.7736	1.82415	1.43621	2.07069			1.29575	1.37518	1.77587	1.60774	2.3031	1.39427
	1.3033	1.75208	1.77352	1.82431	1.43535	2.07171			1.29576	1.37332	1.7773	1.606	2.30892	1.38951
	1.30106	1.755	1.77204	1.82504	1.43422	2.07305			1.29696	1.3733	1.77788	1.60378	2.31083	1.38533
	1.30037	1.75534	1.77201	1.82639	1.43409	2.07753			1.2974	1.37191	1.7781	1.59984	2.31629	1.37426
	1.29935	1.75563	1.77114	1.82654	1.43403	2.08152			1.29811	1.37131	1.77871	1.59943	2.31662	1.37037
	1.29884	1.75655	1.77075	1.82673	1.43349	2.08161			1.29895	1.3713	1.78035	1.59877	2.31663	1.36819
	1.29857	1.7569	1.7693	1.82688	1.43134	2.08575			1.29908	1.37083	1.7855	1.59176	2.32033	1.36795
	1.29815	1.7588	1.76778	1.83025	1.42905	2.0883			1.29993	1.36894	1.78618	1.5854	2.32058	1.3662
	1.29746	1.75887	1.76677	1.83448	1.42708	2.09109			1.30014	1.36838	1.78636	1.58499	2.32426	1.35991
	1.2956	1.75933	1.76657	1.83551	1.42602	2.09123			1.30061	1.36592	1.78715	1.58389	2.32587	1.35206
	1.295	1.75966	1.766	1.8356	1.4258	2.09352			1.30096	1.36413	1.78978	1.57811	2.32653	1.35116
	1.29401	1.75989	1.75831	1.8375	1.42574	2.09449			1.30131	1.36297	1.79122	1.57399	2.3281	1.34919
	1.2933	1.76216	1.75535	1.83781	1.42305	2.09528			1.30162	1.36294	1.79193	1.57375	2.32937	1.34743
	1.29177	1.76294	1.75501	1.83811	1.41987	2.10338			1.30224	1.36289	1.79236	1.57073	2.33621	1.34298
	1.29089	1.76342	1.75278	1.83881	1.41827	2.10702			1.30392	1.36213	1.79351	1.56828	2.33737	1.34271
	1.29054	1.76391	1.75125	1.83917	1.41821	2.10958			1.30471	1.36179	1.79525	1.56749	2.33852	1.33609
	1.28755	1.76463	1.74977	1.8393	1.41621	2.11644			1.30491	1.3614	1.7973	1.56478	2.34451	1.33074
	1.28751	1.7661	1.74813	1.83938	1.41502	2.1189			1.30518	1.35979	1.79816	1.56284	2.34488	1.32914
	1.28577	1.76652	1.74719	1.8422	1.39968	2.12392			1.30529	1.35904	1.80094	1.55947	2.35686	1.31819
	1.28463	1.7684	1.744	1.84223	1.39832	2.12733			1.30687	1.35889	1.80132	1.55926	2.36382	1.31616
	1.28383	1.76844	1.7413	1.84657	1.3942	2.14943			1.30891	1.35776	1.80161	1.55871	2.36741	1.31568
	1.28318	1.77196	1.74078	1.84869	1.39161	2.16317			1.30968	1.35756	1.8027	1.55856	2.37922	1.31365
	1.28169	1.77233	1.74019	1.84891	1.38684	2.16434			1.30983	1.35716	1.80289	1.55836	2.38183	1.30602
	1.27934	1.77239	1.73856	1.85023	1.38412	2.16674			1.31022	1.35651	1.80321	1.55682	2.38566	1.30556
	1.27817	1.7724	1.73835	1.85055	1.38386	2.17299			1.3117	1.35548	1.80496	1.55635	2.38693	1.30457
	1.27775	1.77346	1.73742	1.85316	1.37414	2.1798			1.31183	1.35492	1.80583	1.55112	2.39303	1.30381
	1.27741	1.77376	1.73455	1.85331	1.36985	2.18048			1.31359	1.35485	1.80624	1.55062	2.40122	1.30139
	1.27699	1.77409	1.73396	1.85386	1.35579	2.18135			1.3136	1.35456	1.80773	1.54965	2.40176	1.30049
	1.27149	1.77422	1.72896	1.85418	1.35251	2.18464			1.31405	1.35411	1.80924	1.54959	2.41738	1.29147
	1.27018	1.7746	1.72867	1.85669	1.35205	2.18554			1.31484	1.35391	1.81041	1.54952	2.41909	1.28808
	1.26953	1.77604	1.72679	1.85718	1.34911	2.18629			1.31598	1.35258	1.8111	1.54907	2.42479	1.28677
	1.26925	1.77681	1.72615	1.85724	1.33716	2.19458			1.31828	1.35243	1.81218	1.54811	2.42702	1.28461
	1.26902	1.77736	1.72583	1.85743	1.33544	2.20819			1.31929	1.35147	1.8159	1.54741	2.42775	1.2718
	1.26875	1.77872	1.72205	1.85853	1.33336	2.21122			1.31933	1.34762	1.81606	1.54665	2.44507	1.26996
	1.26862	1.78035	1.72201	1.86227	1.32	2.21589			1.32171	1.34756	1.81869	1.54647	2.44556	1.26851
	1.26786	1.7825	1.72053	1.86286	1.31939	2.21698			1.32276	1.3447	1.8188	1.54591	2.45493	1.2677
	1.26634	1.78369	1.71979	1.86444	1.31597	2.23146			1.323	1.34464	1.81915	1.54553	2.45583	1.26183
	1.26529	1.78645	1.71952	1.86622	1.31075	2.2315			1.32468	1.34453	1.81947	1.54545	2.47916	1.23433
	1.26401	1.78674	1.7187	1.86683	1.3012	2.23352			1.3252	1.34438	1.81988	1.54544	2.48727	1.22374
	1.26378	1.79051	1.71791	1.87187	1.28976	2.24724			1.32681	1.34311	1.82055	1.54534	2.50437	1.22296
	1.26323	1.79055	1.71767	1.87519	1.28487	2.26182			1.32873	1.34272	1.82215	1.54383	2.5071	1.21532
	1.2628	1.79124	1.71432	1.87567	1.28087	2.26853			1.33096	1.34136	1.82225	1.54372	2.52532	1.21085
	1.25773	1.79304	1.71118	1.87713	1.27982	2.2753			1.33421	1.34088	1.82341	1.54185	2.53475	1.20396
	1.25733	1.79381	1.71103	1.88106	1.27619	2.29484			1.33751	1.33932	1.82378	1.53388	2.53985	1.20395
	1.25726	1.79448	1.7103	1.88221	1.26379	2.32875			1.33845	1.33789	1.82662	1.53341	2.54562	1.18518
	1.25671	1.79494	1.70482	1.88347	1.26137	2.36127			1.33852	1.33721	1.82896	1.53234	2.5512	1.17784
	1.25647	1.79498	1.70465	1.88456	1.25929	2.38357			1.34116	1.33657	1.82906	1.53229	2.55436	1.16652
	1.25607	1.79536	1.70434	1.88462	1.25801	2.38667			1.34407	1.33595	1.83108	1.53218	2.5858	1.16642
	1.25545	1.79556	1.70402	1.8867	1.25544	2.38746			1.34425	1.33392	1.83113	1.53209	2.60598	1.16462
	1.25395	1.80051	1.70335	1.88944	1.25158	2.4029			1.34448	1.33362	1.83153	1.53201	2.6084	1.16462
	1.25368	1.80113	1.70192	1.89514	1.24114	2.42814			1.34632	1.33335	1.83155	1.53078	2.61115	1.14905
	1.25159	1.80518	1.70165	1.89515	1.2404	2.43935			1.34681	1.33261	1.83243	1.53064	2.63278	1.11978
	1.25116	1.80611	1.7007	1.89751	1.23944	2.57099			1.34704	1.33196	1.83291	1.52976	2.63995	1.10572
	1.25101	1.80707	1.70023	1.89856	1.23292	2.65121			1.34707	1.33169	1.83451	1.52759	2.64271	1.09629
	1.24915	1.80812	1.69998	1.89881	1.2105	2.70509			1.34751	1.33011	1.83459	1.52613	2.65183	1.06562
	1.24698	1.81054	1.69944	1.90049	1.21026	2.77206			1.34795	1.32991	1.83722	1.52578	2.6651	1.05243
	1.24559	1.81319	1.69943	1.90179	1.20166				1.34799	1.32968	1.83724	1.5257	2.67719
	1.24534	1.81737	1.69748	1.9018	1.20002				1.34808	1.32916	1.83848	1.52514	2.6852
	1.24487	1.81807	1.69718	1.90293	1.19984				1.34881	1.329	1.83977	1.52352	2.71504
	1.24387	1.81846	1.69618	1.90317	1.18896				1.34929	1.32871	1.84004	1.5227	2.75204
	1.24296	1.81977	1.69392	1.90532	1.1582				1.34978	1.32632	1.84102	1.52235	2.76927
	1.24294	1.82607	1.69378	1.90824	1.12943				1.35232	1.32592	1.84118	1.52168	2.79431
	1.24085	1.82788	1.69296	1.90965	1.11124				1.35269	1.32562	1.84408	1.52116	2.79506
	1.24064	1.82788	1.6924	1.91119	1.11049				1.35413	1.32508	1.84531	1.518	2.80611
	1.23948	1.82815	1.69235	1.9115	1.09771				1.35459	1.32484	1.84584	1.51652	2.90684
	1.23826	1.8284	1.69204	1.91166	1.08844				1.35556	1.3229	1.84652	1.51113	3.09591
	1.23674	1.82896	1.68996	1.91209	1.08834				1.35634	1.32183	1.84766	1.50821	3.11742
	1.23515	1.82921	1.68822	1.91423	1.00985				1.35659	1.32041	1.84931	1.50748	3.19865
	1.23422	1.82922	1.68751	1.91527					1.35855	1.32025	1.85008	1.50744
	1.23224	1.8293	1.68664	1.91924					1.36202	1.32024	1.85155	1.50464
	1.23149	1.83008	1.6865	1.9198					1.36389	1.31967	1.85282	1.50357
	1.23096	1.83038	1.68116	1.92526					1.36458	1.31781	1.85305	1.50018
	1.23034	1.83104	1.6794	1.92816					1.36662	1.31781	1.85443	1.49945
	1.22996	1.83162	1.67873	1.92871					1.36809	1.31778	1.8548	1.49275
	1.22987	1.83183	1.67829	1.93084					1.36873	1.31682	1.85514	1.49252
	1.22895	1.83267	1.67779	1.93457					1.36917	1.31619	1.85839	1.49159
	1.22834	1.83374	1.6776	1.93554					1.3703	1.31509	1.86034	1.48897
	1.22616	1.83375	1.67759	1.93566					1.37514	1.31499	1.8605	1.48875
	1.22557	1.83497	1.67677	1.9386					1.37524	1.31463	1.86096	1.48143
	1.22545	1.83541	1.67334	1.93866					1.37597	1.31349	1.86452	1.48078
	1.22521	1.83904	1.6732	1.93873					1.37693	1.31023	1.86508	1.47499
	1.22327	1.83933	1.67305	1.94604					1.37765	1.30758	1.86598	1.47497
	1.22305	1.83935	1.67178	1.94713					1.37822	1.30738	1.86684	1.47419
	1.22224	1.84272	1.67102	1.94735					1.37852	1.30628	1.86748	1.47286
	1.22137	1.84353	1.66966	1.94857					1.38055	1.30604	1.87022	1.47216
	1.21749	1.84359	1.66915	1.94877					1.38089	1.30601	1.87167	1.47016
	1.21733	1.84476	1.66646	1.95252					1.38156	1.30423	1.87244	1.4696
	1.21702	1.8478	1.66594	1.9552					1.3824	1.30248	1.87313	1.46818
	1.21507	1.84821	1.66549	1.95682					1.38292	1.30179	1.87712	1.46798
	1.21381	1.84859	1.66533	1.95817					1.38372	1.30035	1.8798	1.46667
	1.21069	1.84931	1.66523	1.96186					1.38541	1.29899	1.88863	1.46623
	1.20925	1.85014	1.66478	1.96224					1.38598	1.29895	1.88875	1.46427
	1.20702	1.852	1.66422	1.96286					1.38772	1.29893	1.89202	1.46362
	1.20588	1.85511	1.66381	1.96347					1.38869	1.29744	1.89235	1.46332
	1.20469	1.85641	1.66315	1.96447					1.39123	1.29624	1.89257	1.46308
	1.20405	1.8578	1.66133	1.96964					1.39203	1.29586	1.89283	1.46041
	1.20297	1.86194	1.66086	1.97043					1.3937	1.29583	1.8932	1.46028
	1.2025	1.86206	1.65836	1.97807					1.39839	1.29582	1.89479	1.45877
	1.20219	1.86398	1.65763	1.97836					1.39848	1.29468	1.89663	1.45803
	1.20213	1.86424	1.65755	1.9788					1.39849	1.29467	1.89739	1.45626
	1.20175	1.86608	1.6567	1.97888					1.39862	1.29452	1.89789	1.45543
	1.20082	1.87154	1.65597	1.97936					1.40528	1.29347	1.89862	1.45509
	1.20025	1.87206	1.65554	1.98157					1.40566	1.29327	1.89986	1.45499
	1.19614	1.87259	1.65266	1.98205					1.40632	1.29247	1.89996	1.45403
	1.19473	1.8745	1.65164	1.98336					1.40839	1.29201	1.90242	1.45337
	1.19435	1.87553	1.65158	1.98448					1.41031	1.29165	1.90643	1.44679
	1.1929	1.87566	1.65149	1.98497					1.41239	1.29083	1.90684	1.44672
	1.19195	1.87931	1.65104	1.98745					1.41284	1.29065	1.90907	1.44066
	1.19072	1.87963	1.64993	1.98906					1.41298	1.28977	1.91037	1.43873
	1.19061	1.88481	1.64695	1.99042					1.41428	1.28971	1.91298	1.42799
	1.18938	1.885	1.64587	1.992					1.41463	1.28853	1.91349	1.41971
	1.18671	1.88545	1.64393	1.99597					1.41563	1.28792	1.9149	1.41901
	1.18429	1.88727	1.64192	1.99759					1.41821	1.28773	1.91776	1.41711
	1.18306	1.88747	1.63947	1.9986					1.41842	1.28681	1.91884	1.41046
	1.1797	1.88918	1.63781	2.00483					1.41865	1.28669	1.92232	1.40831
	1.17863	1.88985	1.63738	2.00602					1.42202	1.28609	1.92241	1.40673
	1.17416	1.89066	1.63614	2.01049					1.42231	1.2855	1.92604	1.40639
	1.17326	1.89224	1.63401	2.01364					1.42374	1.28438	1.92721	1.40301
	1.17191	1.89271	1.63214	2.01683					1.42382	1.2842	1.93091	1.39654
	1.17171	1.89292	1.63112	2.01811					1.4273	1.28414	1.93428	1.38905
	1.17098	1.8933	1.63096	2.01949					1.42834	1.28392	1.93671	1.38864
	1.16971	1.89344	1.62977	2.0219					1.42964	1.28386	1.93776	1.38662
	1.16948	1.89374	1.62813	2.02677					1.43123	1.28149	1.93802	1.38332
	1.16551	1.89482	1.62702	2.02756					1.43337	1.28056	1.93989	1.38036
	1.16548	1.8952	1.62697	2.02877					1.43575	1.28048	1.93998	1.37563
	1.16128	1.89545	1.6256	2.02949					1.43681	1.27972	1.94369	1.37237
	1.15791	1.89785	1.61924	2.03267					1.43749	1.27949	1.94447	1.36944
	1.15663	1.89803	1.61476	2.03365					1.44263	1.27793	1.94465	1.36885
	1.15532	1.90057	1.61473	2.03446					1.44342	1.27783	1.94956	1.36297
	1.15376	1.90058	1.61196	2.03531					1.44514	1.27714	1.95571	1.35954
	1.15371	1.90076	1.60946	2.03803					1.44929	1.27205	1.96168	1.3595
	1.15328	1.90147	1.60876	2.04142					1.45509	1.27196	1.96303	1.35914
	1.1529	1.90328	1.60677	2.04167					1.45513	1.27111	1.96316	1.35828
	1.14871	1.90443	1.60617	2.04481					1.45872	1.26729	1.96351	1.35812
	1.14777	1.90451	1.60589	2.04825					1.46823	1.26699	1.96643	1.3525
	1.14601	1.90463	1.60566	2.04973					1.46878	1.26524	1.96897	1.35096
	1.14591	1.90756	1.60561	2.05162					1.47266	1.26494	1.96937	1.35057
	1.14453	1.90815	1.6029	2.0518					1.47742	1.26407	1.9707	1.35022
	1.14354	1.90831	1.60123	2.05188					1.48293	1.26268	1.9716	1.34826
	1.13868	1.90863	1.60119	2.05452					1.48413	1.26078	1.97185	1.34804
	1.13636	1.9093	1.60112	2.05493					1.48833	1.25975	1.97186	1.34663
	1.13565	1.91044	1.60082	2.05561					1.48978	1.25972	1.97264	1.34325
	1.13472	1.91275	1.6004	2.05649					1.48991	1.25886	1.97311	1.33587
	1.13407	1.91334	1.60024	2.06161					1.49405	1.25631	1.97317	1.33391
	1.13355	1.91432	1.59852	2.06384					1.49443	1.25384	1.97462	1.33201
	1.1313	1.91762	1.59565	2.06967					1.49595	1.25338	1.97898	1.3308
	1.12999	1.91918	1.59499	2.0712					1.49835	1.25204	1.98088	1.32858
	1.12418	1.92025	1.59454	2.07397					1.5006	1.25062	1.98399	1.32694
	1.12165	1.92123	1.59196	2.07692					1.50114	1.25027	1.98482	1.319
	1.11736	1.92863	1.59087	2.08474					1.50186	1.24942	1.98575	1.31892
	1.11325	1.92873	1.59025	2.08857					1.50296	1.2479	1.98578	1.31622
	1.10818	1.92881	1.59001	2.09019					1.50801	1.2469	1.98813	1.31615
	1.10781	1.93542	1.58448	2.09171					1.5166	1.24689	1.98829	1.31423
	1.10739	1.93676	1.5838	2.09848					1.52385	1.24551	1.98845	1.31212
	1.10511	1.94105	1.58312	2.0985					1.52657	1.24501	1.98882	1.31195
	1.10374	1.94246	1.57863	2.10369					1.52761	1.24491	1.99107	1.31058
	1.10113	1.9435	1.57724	2.10441					1.53172	1.24404	1.99131	1.31012
	1.09729	1.9435	1.57699	2.1056					1.53521	1.24257	1.99569	1.3068
	1.0954	1.94395	1.57536	2.10937					1.53672	1.242	1.99663	1.3046
	1.09368	1.94502	1.57256	2.11099					1.54374	1.24085	1.99767	1.29912
	1.0933	1.94702	1.57	2.11318					1.54553	1.24051	1.99957	1.29846
	1.09276	1.9487	1.5696	2.11738					1.55175	1.23921	2.00009	1.2962
	1.08362	1.95031	1.56905	2.11775					1.55713	1.23528	2.00332	1.29582
	1.07919	1.95347	1.56732	2.12199					1.56161	1.23449	2.00551	1.2929
	1.07723	1.95356	1.56624	2.12249					1.57142	1.23337	2.01272	1.29212
	1.07526	1.95561	1.5629	2.12311					1.58179	1.23311	2.01376	1.28857
	1.07003	1.96326	1.56222	2.12706					1.59464	1.23286	2.01394	1.28779
	1.06823	1.96374	1.56187	2.12762					1.61036	1.23213	2.0153	1.27912
	1.06776	1.96616	1.5585	2.12867					1.61045	1.23161	2.01548	1.2758
	1.06595	1.96639	1.55306	2.12966					1.61665	1.22783	2.01765	1.27548
	1.06316	1.96666	1.54891	2.13035					1.62961	1.22748	2.0211	1.27362
	1.06074	1.97047	1.54845	2.13115					1.63769	1.22714	2.02144	1.27133
	1.05496	1.97283	1.54644	2.13607					1.67531	1.22636	2.02152	1.26921
	1.04402	1.97937	1.5457	2.14792					1.67691	1.22583	2.025	1.26818
	1.04275	1.98069	1.54551	2.15511					1.68097	1.22308	2.02714	1.268
	1.03846	1.98131	1.54489	2.16217					1.70082	1.2204	2.02738	1.26694
	1.03433	1.98181	1.54424	2.165					1.72839	1.21936	2.0279	1.26672
	1.01163	1.98235	1.54321	2.1666					1.74539	1.2189	2.02812	1.266
	0.970477	1.98651	1.54282	2.16948					1.76641	1.21476	2.02856	1.26225
	0.958048	1.9874	1.54196	2.17236					1.80012	1.21393	2.02918	1.2591
	0.936364	1.99014	1.54174	2.18154					1.85645	1.21355	2.02972	1.25473
		1.9918	1.54158	2.18874						1.21204	2.03008	1.24757
		1.9918	1.5414	2.18926						1.2103	2.03073	1.23897
		1.99269	1.54127	2.19054						1.20969	2.0318	1.22902
		1.99413	1.54003	2.1954						1.20778	2.03193	1.22866
		1.99697	1.53926	2.19584						1.20777	2.03312	1.22483
		1.99954	1.53896	2.19747						1.20735	2.03382	1.21972
		2.00032	1.53844	2.23907						1.20653	2.03503	1.21219
		2.00244	1.53764	2.23935						1.20538	2.03762	1.19966
		2.00277	1.53643	2.25461						1.20493	2.03974	1.19952
		2.00515	1.53529	2.27673						1.20313	2.04151	1.19784
		2.00555	1.53476	2.28662						1.20103	2.04554	1.19742
		2.00597	1.53468	2.29063						1.19984	2.04931	1.18392
		2.02315	1.53252	2.2907						1.19978	2.05011	1.16993
		2.03149	1.52861	2.29144						1.19926	2.05234	1.16951
		2.04076	1.52561	2.30815						1.19133	2.05362	1.16659
		2.0425	1.52309	2.30966						1.18802	2.0552	1.15914
		2.04552	1.52175	2.30987						1.18615	2.0561	1.15367
		2.04644	1.52066	2.3116						1.18474	2.0562	1.15251
		2.05259	1.51982	2.31692						1.18445	2.06045	1.14811
		2.05439	1.51974	2.3215						1.18416	2.06243	1.14799
		2.05449	1.51938	2.32289						1.18389	2.06413	1.14521
		2.058	1.51894	2.32497						1.1813	2.06622	1.13934
		2.05855	1.51881	2.32817						1.17796	2.0669	1.13671
		2.06445	1.5185	2.35158						1.17646	2.06693	1.1364
		2.0681	1.51749	2.35677						1.17426	2.07012	1.13338
		2.07043	1.51651	2.38601						1.17344	2.07019	1.13269
		2.07115	1.5126	2.38968						1.17246	2.07301	1.12885
		2.07849	1.5124	2.40678						1.17023	2.07983	1.12371
		2.08021	1.50936	2.40718						1.16764	2.08234	1.12243
		2.08189	1.50715	2.41114						1.16455	2.08407	1.11841
		2.08674	1.50586	2.41161						1.16352	2.09301	1.11126
		2.0881	1.50435	2.41342						1.16117	2.0935	1.11082
		2.09175	1.50404	2.41558						1.15969	2.09388	1.09614
		2.09475	1.50295	2.4326						1.1582	2.09663	1.08729
		2.09672	1.50114	2.44106						1.15562	2.09706	1.08401
		2.10106	1.50078	2.44225						1.15488	2.09732	1.08249
		2.10366	1.50009	2.44649						1.15204	2.09929	1.06886
		2.10445	1.49912	2.44954						1.14897	2.09945	1.04579
		2.10705	1.49903	2.46086						1.14246	2.10138	1.03761
		2.11015	1.49825	2.46819						1.14209	2.10231	1.02583
		2.11126	1.49819	2.47262						1.14119	2.10662	1.01971
		2.115	1.49642	2.47344						1.1384	2.1075	1.00854
		2.12066	1.49587	2.48368						1.13786	2.10804	1.00125
		2.12382	1.49254	2.50469						1.13785	2.10965	0.983566
		2.12703	1.49219	2.52409						1.13778	2.11463	0.980333
		2.13737	1.49063	2.54858						1.13735	2.11536	0.979289
		2.13901	1.48863	2.54878						1.13688	2.11536	0.961033
		2.14087	1.48828	2.55198						1.13469	2.11763	0.932044
		2.14486	1.48651	2.55694						1.13396	2.12054	0.923263
		2.14555	1.48378	2.5779						1.13	2.12302	0.913194
		2.14736	1.4803	2.58153						1.12077	2.1231	0.90971
		2.1503	1.47718	3.28359						1.11789	2.12436	0.769412
		2.1507	1.4729							1.11123	2.12472
		2.15612	1.47245							1.11089	2.12639
		2.15713	1.46839							1.1106	2.12701
		2.15744	1.46778							1.10723	2.12775
		2.16852	1.46617							1.10721	2.12872
		2.16968	1.46566							1.10693	2.13048
		2.17066	1.4651							1.10598	2.13279
		2.17267	1.46053							1.10587	2.1339
		2.17788	1.45963							1.10567	2.13397
		2.18248	1.45591							1.10413	2.13747
		2.18728	1.45582							1.10284	2.14225
		2.189	1.45463							1.09932	2.14261
		2.1957	1.45362							1.09774	2.14516
		2.19878	1.4532							1.0945	2.14628
		2.20487	1.4468							1.09163	2.14672
		2.21599	1.44417							1.08334	2.14708
		2.23312	1.44375							1.08199	2.14786
		2.25234	1.44287							1.08002	2.15426
		2.25928	1.44242							1.07881	2.16468
		2.27442	1.44028							1.07178	2.16711
		2.29366	1.43813							1.06787	2.16786
		2.32255	1.43746							1.06339	2.17129
		2.4011	1.43656							1.05463	2.17574
		2.4052	1.42903							1.05457	2.18983
		2.41616	1.42191							1.05082	2.19088
		2.42218	1.4209							1.0389	2.19491
		2.54442	1.42076							1.03408	2.19563
		2.72305	1.42041							0.977416	2.19854
			1.41739								2.20192
			1.41295								2.20346
			1.41001								2.21256
			1.40865								2.21983
			1.40835								2.22068
			1.40721								2.22669
			1.40487								2.23242
			1.40396								2.23402
			1.40261								2.23432
			1.40185								2.23678
			1.40158								2.24555
			1.40084								2.24918
			1.39923								2.24935
			1.39894								2.24956
			1.39184								2.25913
			1.38655								2.25952
			1.37915								2.25985
			1.37885								2.26999
			1.37878								2.27128
			1.37763								2.27357
			1.37708								2.27908
			1.37262								2.27981
			1.37245								2.28107
			1.36969								2.29346
			1.36298								2.29406
			1.36209								2.29909
			1.36188								2.3026
			1.36045								2.30354
			1.35913								2.30867
			1.35568								2.31344
			1.34451								2.31371
			1.34016								2.32294
			1.33655								2.33367
			1.3288								2.34549
			1.31985								2.34784
			1.3086								2.34912
			1.30373								2.34984
			1.30288								2.35402
			1.29962								2.3588
			1.29033								2.37222
			1.27877								2.37387
			1.2666								2.37923
			1.26431								2.39089
			1.25987								2.39648
			1.25621								2.39779
			1.25201								2.40793
			1.25078								2.41057
			1.24957								2.46462
			1.24822								2.46929
			1.24782								2.47026
			1.24437								2.4898
			1.24148								2.49346
			1.21947								2.5026
			1.21947								2.50331
			1.21438								2.51651
			1.18869								2.51741
			1.18863								2.53719
			1.09837								2.54505
			1.09419								2.58742
			1.05936								2.6174
			0.983197								2.65728
			0.976017								2.69055
			0.971983								2.72596
			0.887647								2.75598
			0.877731								3.09123

## Sheet: Msn2-Hog1
Msn2-mCherry_nuclei_VS_cytoplasm_median-TIME-0	Msn2-mCherry_nuclei_VS_cytoplasm_median-TIME-5	Msn2-mCherry_nuclei_VS_cytoplasm_median-TIME-10	Msn2-mCherry_nuclei_VS_cytoplasm_median-TIME-15	Msn2-mCherry_nuclei_VS_cytoplasm_median-TIME-20	Msn2-mCherry_nuclei_VS_cytoplasm_median-TIME-25	Msn2-mCherry_nuclei_VS_cytoplasm_median-TIME-30		Hog1-GFP_nuclei_VS_cytoplasm_median-TIME-0	Hog1-GFP_nuclei_VS_cytoplasm_median-TIME-5	Hog1-GFP_nuclei_VS_cytoplasm_median-TIME-10	Hog1-GFP_nuclei_VS_cytoplasm_median-TIME-15	Hog1-GFP_nuclei_VS_cytoplasm_median-TIME-20	Hog1-GFP_nuclei_VS_cytoplasm_median-TIME-25	Hog1-GFP_nuclei_VS_cytoplasm_median-TIME-30
0.804411	2.15176	0.897437	3.74722	0.905387	3.08528	0.944147		1.46578	0.991241	2.45905	0.990915	2.35888	0.93745	2.12959
0.830941	2.14404	0.922879	3.46623	0.933215	2.93539	0.963186		1.42588	1.02835	2.35586	0.998577	2.35835	0.976691	2.11187
0.83229	2.11104	1.04388	3.40736	1.02877	2.92027	1.04032		1.39957	1.03994	2.35034	1.00159	2.33284	0.999369	2.10519
0.837149	2.08995	1.04716	3.26643	1.0336	2.8214	1.07942		1.39598	1.05094	2.32309	1.02909	2.31222	1.03941	2.02228
0.850519	2.07918	1.05044	3.2137	1.03926	2.78266	1.09319		1.38958	1.05143	2.31948	1.03072	2.30231	1.06109	2.00843
0.853247	2.06094	1.05045	3.20243	1.06493	2.78095	1.1111		1.37956	1.05289	2.31414	1.05685	2.29112	1.06649	1.98616
0.856769	2.05781	1.06722	3.18714	1.09706	2.77477	1.1232		1.37782	1.06258	2.30838	1.089	2.27685	1.08272	1.97834
0.859521	2.04652	1.09026	3.17064	1.1293	2.75692	1.14425		1.36973	1.07923	2.30443	1.10442	2.22638	1.10625	1.96023
0.861944	2.02633	1.10371	3.15405	1.13005	2.71141	1.15021		1.36577	1.09283	2.28964	1.1204	2.21065	1.12542	1.95252
0.874797	2.01567	1.10595	3.1527	1.15523	2.6665	1.15658		1.36298	1.09609	2.28594	1.12574	2.19786	1.12955	1.9468
0.878371	2.00801	1.12068	3.12612	1.2179	2.62855	1.15769		1.35687	1.09927	2.28016	1.13596	2.19424	1.13529	1.93747
0.881202	1.9795	1.12791	3.08076	1.2381	2.60324	1.15985		1.35124	1.10913	2.27858	1.16865	2.18604	1.13857	1.93618
0.88226	1.97764	1.13441	3.03323	1.23932	2.59071	1.17109		1.35027	1.11819	2.27718	1.23754	2.18457	1.14508	1.93544
0.885359	1.95651	1.14327	3.03265	1.25788	2.58501	1.18793		1.34721	1.131	2.27686	1.24594	2.18315	1.17616	1.91979
0.886287	1.9535	1.14378	3.01319	1.26641	2.54793	1.21434		1.3471	1.13534	2.27643	1.26564	2.17594	1.17686	1.91538
0.886367	1.95318	1.14445	2.98258	1.2784	2.52782	1.22151		1.34461	1.13548	2.27335	1.31728	2.17429	1.17719	1.91283
0.886594	1.94857	1.14687	2.9723	1.30016	2.51252	1.22869		1.34358	1.14169	2.27181	1.34205	2.17313	1.18994	1.90435
0.887827	1.94728	1.15207	2.95701	1.30183	2.48758	1.22896		1.33724	1.14317	2.26127	1.36148	2.1722	1.20105	1.90077
0.8926	1.94684	1.18975	2.95596	1.32104	2.48744	1.22897		1.33516	1.14467	2.25693	1.38635	2.16806	1.20272	1.89985
0.893297	1.94581	1.19307	2.95066	1.32435	2.45862	1.24163		1.33483	1.16217	2.24319	1.38742	2.16665	1.22444	1.89961
0.893968	1.94161	1.20222	2.94711	1.32768	2.45456	1.24501		1.3348	1.16613	2.24239	1.3909	2.15197	1.22486	1.8909
0.90252	1.93772	1.22356	2.93565	1.34445	2.44588	1.24848		1.33312	1.17141	2.23566	1.39218	2.15173	1.23573	1.89057
0.90261	1.93533	1.22466	2.91418	1.35188	2.43601	1.25343		1.33275	1.17376	2.224	1.39248	2.14977	1.25045	1.89016
0.904313	1.93431	1.22878	2.90076	1.3791	2.41361	1.2552		1.33081	1.20707	2.22285	1.39533	2.13492	1.25661	1.88791
0.905511	1.92767	1.23223	2.89157	1.39668	2.39371	1.25879		1.32996	1.22177	2.21535	1.39534	2.1349	1.25875	1.88614
0.906728	1.92121	1.25515	2.88637	1.40435	2.38792	1.28078		1.3286	1.22744	2.21385	1.40562	2.11473	1.25945	1.88275
0.910623	1.91939	1.26254	2.88498	1.40468	2.38329	1.28087		1.32756	1.22823	2.2109	1.40829	2.11095	1.27812	1.88158
0.913187	1.91775	1.27918	2.88031	1.41485	2.38153	1.28271		1.32677	1.2325	2.21025	1.4105	2.10917	1.28113	1.88068
0.913841	1.91413	1.28043	2.87998	1.41566	2.37011	1.28316		1.3263	1.23418	2.19889	1.41563	2.10855	1.28187	1.88066
0.913966	1.90815	1.28275	2.84964	1.41576	2.36975	1.2849		1.32536	1.23756	2.19845	1.41761	2.10305	1.28513	1.87988
0.914466	1.90679	1.2842	2.84952	1.41624	2.35424	1.28983		1.32495	1.24149	2.19455	1.42406	2.10107	1.30297	1.87769
0.914863	1.90288	1.28816	2.84477	1.42254	2.35379	1.30467		1.32351	1.24265	2.18903	1.42456	2.09936	1.30847	1.87289
0.915319	1.89681	1.29419	2.83431	1.42305	2.34782	1.3121		1.32208	1.24458	2.18717	1.42496	2.09536	1.31033	1.87138
0.918025	1.88939	1.29466	2.82832	1.42468	2.34737	1.31236		1.31897	1.25115	2.1865	1.4354	2.09104	1.31239	1.86947
0.919512	1.88923	1.30211	2.82729	1.42478	2.34522	1.31259		1.31784	1.25139	2.18632	1.43576	2.09071	1.31258	1.86862
0.919865	1.88494	1.30472	2.82316	1.42524	2.34268	1.31433		1.31634	1.25473	2.18607	1.4361	2.08992	1.31884	1.868
0.919985	1.87977	1.30821	2.81857	1.43557	2.3381	1.31562		1.31579	1.25921	2.18216	1.43689	2.0879	1.32116	1.86631
0.923654	1.87005	1.30896	2.8183	1.43948	2.33522	1.31699		1.30905	1.27738	2.17373	1.45836	2.08432	1.32181	1.86514
0.924687	1.86726	1.30933	2.79456	1.43952	2.334	1.32198		1.30829	1.28955	2.16985	1.46079	2.08403	1.32931	1.8643
0.925109	1.86524	1.31288	2.76241	1.44006	2.3327	1.32234		1.3081	1.30115	2.16889	1.47134	2.08306	1.33522	1.86404
0.926312	1.86119	1.3172	2.75703	1.44135	2.3316	1.32461		1.30772	1.31403	2.16792	1.47615	2.07988	1.33865	1.86391
0.92663	1.85227	1.31805	2.75241	1.44496	2.32981	1.32462		1.30643	1.31696	2.16396	1.47898	2.07724	1.34181	1.85824
0.929816	1.84938	1.31929	2.74691	1.44733	2.32904	1.33619		1.30588	1.31892	2.16314	1.48004	2.07565	1.35124	1.85698
0.930212	1.84755	1.32201	2.7453	1.4508	2.32723	1.34707		1.30554	1.32045	2.16312	1.48006	2.07469	1.35684	1.85667
0.930247	1.84637	1.32367	2.73945	1.4516	2.32339	1.34736		1.30032	1.3227	2.16125	1.48307	2.07329	1.3586	1.85278
0.930737	1.83898	1.32677	2.72552	1.45453	2.32247	1.35161		1.29784	1.32419	2.15364	1.48316	2.07183	1.35912	1.85098
0.932849	1.83724	1.32991	2.71645	1.4551	2.31424	1.35271		1.29752	1.32561	2.15114	1.4863	2.07013	1.36208	1.84888
0.934069	1.83705	1.33323	2.71036	1.45926	2.30678	1.3545		1.29635	1.33702	2.14918	1.48661	2.06973	1.36434	1.84874
0.934397	1.83514	1.33439	2.7033	1.45941	2.30548	1.36154		1.29601	1.33766	2.14379	1.48808	2.06627	1.36768	1.84253
0.934663	1.83294	1.34177	2.69408	1.46008	2.30392	1.36248		1.29582	1.34105	2.14031	1.49152	2.06269	1.36892	1.84206
0.934942	1.8302	1.34292	2.69179	1.46167	2.30389	1.36293		1.29448	1.34548	2.13978	1.49314	2.05997	1.36926	1.84191
0.936439	1.82985	1.34302	2.68971	1.46229	2.30237	1.3661		1.29387	1.35207	2.13735	1.49498	2.05573	1.36934	1.83725
0.93659	1.82796	1.34373	2.68011	1.46484	2.29753	1.367		1.29312	1.35242	2.132	1.49815	2.05497	1.37112	1.83628
0.936961	1.82272	1.34417	2.67749	1.47272	2.29727	1.36955		1.29219	1.35349	2.12797	1.50024	2.05263	1.37258	1.83485
0.93728	1.8226	1.34997	2.67733	1.4751	2.29324	1.37076		1.29202	1.35688	2.12359	1.50717	2.04814	1.37288	1.83447
0.938839	1.81792	1.35856	2.66434	1.47593	2.29283	1.37093		1.29198	1.35838	2.1218	1.50957	2.04793	1.37444	1.83397
0.939042	1.81409	1.35896	2.65029	1.48119	2.28526	1.372		1.29049	1.35881	2.12127	1.50978	2.04574	1.37494	1.83219
0.939255	1.81236	1.35898	2.63896	1.48134	2.28327	1.37551		1.28768	1.35908	2.11669	1.51679	2.04204	1.37671	1.82932
0.93945	1.81043	1.35964	2.62422	1.48155	2.28169	1.37596		1.28674	1.36184	2.11444	1.51945	2.04157	1.37919	1.82833
0.939455	1.80777	1.36279	2.61789	1.48162	2.28101	1.38183		1.28615	1.36679	2.11426	1.52349	2.04141	1.38117	1.82272
0.939669	1.80618	1.36281	2.61778	1.48283	2.27958	1.38378		1.28494	1.3681	2.11139	1.52644	2.03571	1.38293	1.82265
0.93997	1.80609	1.36338	2.61752	1.48552	2.27803	1.3861		1.28435	1.37236	2.10708	1.52783	2.03482	1.383	1.82254
0.940496	1.80427	1.36697	2.60537	1.48683	2.26758	1.39596		1.28254	1.37508	2.10689	1.52868	2.03361	1.38332	1.82235
0.941709	1.80312	1.36698	2.60264	1.49082	2.2671	1.39623		1.28208	1.37594	2.10544	1.52922	2.02806	1.38698	1.82169
0.943324	1.79845	1.36813	2.5964	1.49102	2.26497	1.3977		1.28201	1.37729	2.10359	1.5305	2.02463	1.39134	1.82085
0.943894	1.79791	1.3683	2.58449	1.49295	2.2613	1.39842		1.28176	1.38352	2.09967	1.53152	2.02147	1.39349	1.82004
0.94448	1.79721	1.37447	2.58296	1.50375	2.25293	1.40648		1.28143	1.3902	2.09754	1.53172	2.01524	1.39687	1.81645
0.945792	1.79594	1.37955	2.57443	1.50456	2.24366	1.40892		1.28061	1.39032	2.09618	1.53184	2.01463	1.40155	1.81639
0.946375	1.79549	1.38101	2.57299	1.50663	2.24141	1.41108		1.27872	1.39158	2.09611	1.53212	2.01451	1.40165	1.81514
0.947196	1.79267	1.38913	2.56812	1.50967	2.23953	1.41496		1.27784	1.3933	2.09458	1.5337	2.012	1.40482	1.81357
0.947336	1.79239	1.38974	2.56518	1.51091	2.23602	1.41816		1.27714	1.39388	2.09444	1.53629	2.01077	1.40763	1.81171
0.94818	1.79143	1.39016	2.56499	1.51429	2.22922	1.41928		1.27651	1.39675	2.09432	1.53812	2.00916	1.4127	1.80964
0.948319	1.78745	1.39141	2.55919	1.52866	2.22732	1.4212		1.27588	1.39788	2.0934	1.5386	2.0073	1.41323	1.80888
0.948682	1.78466	1.39176	2.55911	1.53135	2.22697	1.43226		1.27583	1.39968	2.09329	1.53994	2.00425	1.41761	1.80762
0.948784	1.78337	1.39222	2.55276	1.53182	2.21843	1.43342		1.27527	1.4043	2.09252	1.54034	2.00417	1.42042	1.80637
0.949816	1.7814	1.39337	2.54922	1.53335	2.21779	1.43716		1.27492	1.40559	2.0888	1.5408	2.00349	1.42394	1.80566
0.951042	1.78096	1.39383	2.54198	1.53443	2.21742	1.43745		1.27436	1.40609	2.08824	1.54094	2.00323	1.42533	1.80158
0.952026	1.77692	1.39413	2.53706	1.53781	2.21253	1.44274		1.27425	1.40716	2.08818	1.54558	2.00313	1.42737	1.7988
0.953153	1.77497	1.39415	2.53356	1.53787	2.20751	1.44382		1.27348	1.41135	2.08778	1.54561	2.00309	1.43043	1.79714
0.953366	1.77487	1.39893	2.53153	1.53815	2.20726	1.44499		1.27346	1.41297	2.08777	1.5458	2.00233	1.43341	1.79433
0.954216	1.77253	1.4	2.51801	1.53878	2.20696	1.44588		1.27185	1.41323	2.08446	1.54708	1.99708	1.43445	1.79345
0.955584	1.76593	1.40162	2.51577	1.54256	2.20426	1.44656		1.27184	1.41616	2.08421	1.54756	1.9893	1.43706	1.79272
0.956042	1.7627	1.40242	2.50945	1.54317	2.20163	1.44804		1.27091	1.41727	2.08401	1.54905	1.98873	1.43874	1.7919
0.956793	1.76133	1.40506	2.50873	1.54324	2.20027	1.44883		1.27023	1.41796	2.08364	1.55018	1.98867	1.44059	1.79135
0.957275	1.75691	1.4116	2.50798	1.54542	2.19226	1.44983		1.27012	1.41841	2.08036	1.5537	1.98827	1.44099	1.79045
0.959143	1.75038	1.4169	2.49918	1.54726	2.19151	1.45157		1.2695	1.42006	2.08012	1.55485	1.98737	1.4415	1.7881
0.959713	1.74962	1.42012	2.49405	1.54774	2.18029	1.45378		1.26872	1.42157	2.07183	1.5556	1.9872	1.44416	1.78621
0.959863	1.74465	1.4206	2.49036	1.54877	2.17302	1.45404		1.2686	1.42299	2.06893	1.55873	1.98667	1.4454	1.77643
0.961568	1.74171	1.42137	2.48998	1.55188	2.16535	1.46091		1.26474	1.42525	2.06814	1.55932	1.98507	1.44689	1.77317
0.962202	1.7402	1.42192	2.48528	1.55328	2.16281	1.46214		1.26431	1.42531	2.06496	1.56067	1.98413	1.44879	1.77264
0.963254	1.73823	1.42286	2.48519	1.55369	2.16101	1.46268		1.26413	1.42549	2.06417	1.56821	1.98201	1.44934	1.76659
0.963811	1.73727	1.42371	2.483	1.55582	2.16062	1.46387		1.26384	1.42571	2.06229	1.56866	1.98186	1.45205	1.76575
0.96463	1.73727	1.42514	2.48188	1.55799	2.15436	1.46462		1.26382	1.42964	2.06039	1.56916	1.98055	1.45329	1.76571
0.964908	1.73481	1.42542	2.4793	1.55991	2.15249	1.46956		1.26336	1.43199	2.06033	1.57662	1.97963	1.45678	1.76443
0.965019	1.73134	1.42891	2.46735	1.56189	2.15116	1.47533		1.26235	1.43412	2.05955	1.5809	1.97494	1.45788	1.76329
0.965044	1.72848	1.43119	2.46603	1.56798	2.14362	1.47624		1.26008	1.43657	2.05874	1.58123	1.97452	1.45989	1.76325
0.965088	1.72817	1.43221	2.46585	1.56837	2.13938	1.47856		1.25966	1.43964	2.05858	1.58238	1.97434	1.46204	1.76281
0.965329	1.72593	1.4338	2.46148	1.56935	2.13177	1.48615		1.25887	1.4409	2.05707	1.5852	1.97294	1.46302	1.76094
0.965386	1.72527	1.43495	2.46064	1.57065	2.12743	1.48647		1.25874	1.44279	2.05654	1.5853	1.97276	1.4644	1.75908
0.965805	1.72295	1.44064	2.45958	1.57191	2.12735	1.48736		1.25861	1.44414	2.0532	1.58537	1.97204	1.46915	1.75907
0.965898	1.72259	1.44218	2.45604	1.57423	2.12714	1.48782		1.25803	1.44521	2.05304	1.58572	1.9691	1.47014	1.75773
0.966558	1.72093	1.44469	2.45308	1.57465	2.12684	1.49339		1.25802	1.44706	2.05284	1.58897	1.96909	1.47156	1.75638
0.966599	1.71989	1.44537	2.45136	1.5756	2.1247	1.49388		1.25746	1.44727	2.05175	1.59132	1.96872	1.47226	1.75449
0.967496	1.71924	1.44587	2.44314	1.57769	2.12413	1.49625		1.25715	1.44788	2.05015	1.59206	1.96778	1.47581	1.75441
0.967834	1.71848	1.44746	2.43778	1.5787	2.11959	1.49685		1.257	1.44887	2.04966	1.59392	1.96745	1.47912	1.75371
0.968426	1.7159	1.45821	2.43639	1.57915	2.11827	1.49693		1.2566	1.45311	2.0436	1.59425	1.96626	1.48157	1.7506
0.968695	1.71573	1.46243	2.43404	1.58207	2.11219	1.5043		1.25622	1.45322	2.04204	1.59672	1.96338	1.48322	1.74886
0.968888	1.71483	1.4635	2.43308	1.58535	2.11104	1.50591		1.2555	1.45339	2.04175	1.59712	1.96019	1.48447	1.74869
0.969424	1.71329	1.46555	2.43217	1.58556	2.10105	1.50779		1.25379	1.45345	2.03983	1.59793	1.95857	1.48479	1.74838
0.969546	1.7121	1.46562	2.42868	1.5904	2.09996	1.50966		1.25295	1.45535	2.03948	1.59811	1.95679	1.48807	1.74726
0.969841	1.70931	1.46977	2.42647	1.59085	2.09319	1.51136		1.25264	1.46388	2.03899	1.6034	1.95507	1.48961	1.74698
0.969872	1.70762	1.47163	2.42321	1.59119	2.09062	1.51302		1.25198	1.46521	2.03823	1.60403	1.95494	1.49153	1.74646
0.97044	1.70689	1.47231	2.42178	1.59172	2.08732	1.51383		1.25193	1.46622	2.03713	1.60556	1.95425	1.49357	1.74608
0.970641	1.7061	1.47259	2.42162	1.59476	2.08293	1.51504		1.25176	1.46628	2.03446	1.61288	1.95337	1.49363	1.74578
0.970809	1.70573	1.47335	2.42137	1.59762	2.07769	1.51635		1.25145	1.47088	2.03416	1.61327	1.95231	1.49373	1.74556
0.97146	1.70531	1.47433	2.41859	1.59852	2.07689	1.51661		1.25122	1.47188	2.03329	1.61673	1.95141	1.49478	1.74512
0.971822	1.70369	1.4772	2.41182	1.59857	2.07397	1.51859		1.25097	1.47386	2.03201	1.61874	1.95111	1.49901	1.74364
0.972672	1.70217	1.47771	2.41179	1.59971	2.07372	1.51902		1.24988	1.47658	2.02782	1.62104	1.9507	1.50196	1.74307
0.972979	1.70106	1.47892	2.41098	1.60182	2.07095	1.51913		1.24976	1.47793	2.02723	1.62227	1.94947	1.50202	1.74206
0.973964	1.70097	1.48171	2.40948	1.6078	2.06562	1.51937		1.24969	1.47989	2.02702	1.623	1.94889	1.50626	1.74169
0.974155	1.70055	1.48427	2.40922	1.60951	2.06333	1.51983		1.24822	1.48336	2.02588	1.62472	1.94884	1.50779	1.74088
0.974698	1.70019	1.48699	2.40597	1.61005	2.06302	1.52189		1.24786	1.48619	2.02522	1.6251	1.94526	1.50792	1.73954
0.974938	1.69851	1.48844	2.40521	1.61042	2.06217	1.52222		1.24686	1.48629	2.02313	1.62582	1.94515	1.50883	1.73934
0.97559	1.69743	1.4942	2.3942	1.61066	2.06132	1.52573		1.24677	1.4872	2.02206	1.62587	1.94452	1.50979	1.73916
0.976262	1.69283	1.49834	2.39396	1.61345	2.05207	1.52693		1.24598	1.48723	2.02197	1.62684	1.94417	1.5104	1.73889
0.977283	1.68996	1.49878	2.39225	1.61395	2.04957	1.52915		1.24543	1.4912	2.02174	1.62686	1.94392	1.51151	1.73797
0.977433	1.68824	1.49895	2.38714	1.616	2.04798	1.53378		1.24466	1.4931	2.02132	1.62702	1.94259	1.51206	1.73772
0.978191	1.6855	1.50266	2.38133	1.61984	2.04403	1.53631		1.24411	1.4981	2.02128	1.62775	1.9413	1.51267	1.73767
0.979183	1.68531	1.50293	2.38001	1.61997	2.04397	1.53793		1.24395	1.49959	2.02094	1.6303	1.93905	1.51335	1.73518
0.979452	1.68491	1.50395	2.37681	1.62463	2.04342	1.53942		1.24391	1.50071	2.01735	1.63423	1.93641	1.51475	1.73515
0.979473	1.68461	1.50537	2.37093	1.6256	2.04317	1.54118		1.2439	1.50646	2.01677	1.63602	1.93346	1.51533	1.73495
0.979695	1.6841	1.50865	2.36882	1.62933	2.03898	1.542		1.24388	1.50694	2.01642	1.63937	1.9329	1.51557	1.73431
0.980779	1.68404	1.51038	2.36581	1.63126	2.03889	1.54658		1.24383	1.50703	2.0144	1.63993	1.93105	1.51679	1.732
0.980792	1.68398	1.51058	2.36245	1.63317	2.03849	1.54711		1.24354	1.50837	2.01361	1.64135	1.92926	1.51878	1.72852
0.980864	1.68325	1.51176	2.36017	1.63761	2.03676	1.54765		1.24307	1.50924	2.01269	1.64353	1.92783	1.51986	1.72771
0.981964	1.68067	1.5127	2.3589	1.63799	2.03669	1.55007		1.24301	1.51015	2.01156	1.64446	1.92736	1.51991	1.72744
0.982231	1.67967	1.51311	2.35395	1.63837	2.0355	1.55251		1.24288	1.51059	2.01104	1.64496	1.9253	1.52064	1.72668
0.983196	1.67932	1.51601	2.34957	1.63984	2.03312	1.55489		1.24268	1.51394	2.00781	1.64618	1.92525	1.52608	1.72647
0.983328	1.67661	1.51774	2.34801	1.64116	2.03103	1.55579		1.24259	1.51504	2.0078	1.64633	1.92447	1.52635	1.7259
0.983571	1.67357	1.51921	2.34623	1.64156	2.03046	1.55598		1.24249	1.51521	2.00675	1.64639	1.92437	1.52649	1.72569
0.983774	1.67297	1.5208	2.34605	1.64316	2.02918	1.55628		1.24184	1.51713	2.00585	1.64673	1.92409	1.52769	1.72381
0.983843	1.6718	1.52196	2.3445	1.64587	2.02599	1.55758		1.24174	1.5176	2.00479	1.64674	1.92394	1.52917	1.7238
0.984111	1.67076	1.52582	2.34266	1.64651	2.0173	1.56348		1.2417	1.51854	2.00273	1.64776	1.92349	1.53099	1.72379
0.984151	1.67038	1.52689	2.3406	1.64995	2.01707	1.56627		1.24143	1.51945	2.00171	1.64996	1.92317	1.53144	1.72245
0.984184	1.66982	1.52837	2.34006	1.65035	2.01286	1.56943		1.24099	1.52037	2.00052	1.65042	1.92301	1.53167	1.72019
0.984441	1.66944	1.52946	2.3398	1.65113	2.01123	1.57127		1.24099	1.52046	1.99608	1.65122	1.92178	1.53233	1.71895
0.984506	1.66905	1.53029	2.3301	1.66034	2.00737	1.57448		1.23987	1.5233	1.99563	1.65374	1.92152	1.53317	1.7188
0.984554	1.66896	1.53124	2.32913	1.66179	2.00648	1.57683		1.2397	1.52413	1.99544	1.65429	1.91942	1.53356	1.71863
0.985083	1.66833	1.53469	2.31637	1.66388	2.00487	1.57802		1.23942	1.52465	1.99422	1.65486	1.91886	1.53433	1.71784
0.985516	1.66807	1.53621	2.30858	1.66639	2.00483	1.57805		1.23942	1.52478	1.99141	1.65612	1.91848	1.53539	1.71765
0.986339	1.66766	1.53631	2.30282	1.66676	2.00095	1.58154		1.23903	1.52578	1.99134	1.65615	1.9171	1.53542	1.71764
0.98679	1.66708	1.53705	2.30163	1.66888	1.99689	1.58257		1.2389	1.52631	1.99081	1.65884	1.91601	1.53958	1.71742
0.986944	1.6665	1.54157	2.30032	1.66916	1.99622	1.58266		1.23786	1.52787	1.98951	1.66009	1.91598	1.54108	1.71582
0.987024	1.66597	1.5416	2.29599	1.67019	1.99285	1.58795		1.23766	1.52866	1.98914	1.66181	1.91533	1.54263	1.71544
0.98795	1.66544	1.54196	2.28027	1.67133	1.98988	1.58928		1.23722	1.52899	1.98445	1.66184	1.9151	1.54384	1.71513
0.988318	1.66464	1.54198	2.27468	1.67135	1.98941	1.58944		1.23677	1.52935	1.9834	1.66241	1.91485	1.54449	1.71493
0.989921	1.65969	1.54351	2.27432	1.6731	1.98606	1.59088		1.23675	1.53077	1.98145	1.6643	1.91219	1.54684	1.71255
0.990944	1.65788	1.5439	2.27205	1.67809	1.98498	1.5944		1.23644	1.53365	1.98098	1.66511	1.91187	1.54831	1.71221
0.991398	1.65681	1.54675	2.27163	1.68046	1.98234	1.59503		1.23626	1.53509	1.97927	1.66557	1.91178	1.54866	1.71213
0.992337	1.65397	1.5523	2.2689	1.68408	1.97811	1.59503		1.23605	1.53619	1.9788	1.66557	1.91146	1.54934	1.71203
0.992472	1.65367	1.55297	2.26678	1.68538	1.9732	1.59649		1.23484	1.53651	1.97809	1.66592	1.9112	1.54981	1.71123
0.992627	1.65296	1.55517	2.26631	1.68679	1.96985	1.60167		1.23471	1.53725	1.97808	1.66671	1.91086	1.55111	1.7102
0.992694	1.6524	1.55786	2.26314	1.68799	1.96745	1.60527		1.23332	1.53741	1.97803	1.66738	1.90966	1.55242	1.70994
0.992701	1.65184	1.55877	2.26132	1.68925	1.96583	1.60644		1.23008	1.53759	1.97767	1.66767	1.90931	1.55849	1.70917
0.992836	1.64973	1.56129	2.26017	1.69054	1.96574	1.60796		1.22987	1.53997	1.97532	1.66803	1.90899	1.56047	1.7087
0.993679	1.64935	1.56142	2.25936	1.69178	1.96164	1.608		1.22971	1.54077	1.97527	1.66955	1.90807	1.56058	1.70858
0.993852	1.64481	1.5615	2.25668	1.69615	1.96158	1.60945		1.2297	1.54225	1.97503	1.67087	1.90613	1.56063	1.70855
0.994041	1.64469	1.56428	2.25596	1.69625	1.95696	1.6112		1.22918	1.54278	1.97378	1.67142	1.90583	1.56096	1.7082
0.994325	1.64298	1.5655	2.25157	1.6988	1.95506	1.61288		1.22915	1.54451	1.97375	1.6723	1.90488	1.56225	1.70611
0.995809	1.64143	1.5687	2.2504	1.69908	1.95494	1.61588		1.22866	1.54489	1.97288	1.67288	1.90383	1.56242	1.7059
0.996302	1.63874	1.56987	2.24986	1.70128	1.95472	1.61774		1.22865	1.54626	1.97244	1.67317	1.90356	1.5632	1.70454
0.996919	1.63767	1.57077	2.24986	1.70748	1.95187	1.61918		1.22804	1.55074	1.97142	1.67587	1.90209	1.56352	1.70443
0.997212	1.63672	1.57283	2.24594	1.70894	1.95172	1.6205		1.22788	1.55153	1.97111	1.67762	1.90166	1.56431	1.70346
0.998116	1.63659	1.57477	2.24347	1.71044	1.95172	1.62114		1.22702	1.55214	1.97104	1.67815	1.90097	1.56556	1.70323
0.998696	1.63591	1.57538	2.2427	1.71071	1.94945	1.62538		1.22661	1.55234	1.96958	1.6787	1.89983	1.56628	1.70307
0.998817	1.63578	1.57793	2.24057	1.71164	1.94917	1.62944		1.22657	1.55286	1.9686	1.67871	1.8989	1.56863	1.70174
0.999104	1.63576	1.57849	2.2351	1.71259	1.94819	1.63277		1.22649	1.5529	1.96816	1.68099	1.89784	1.56917	1.70115
0.999617	1.63406	1.58024	2.22932	1.71364	1.94773	1.63496		1.22621	1.55309	1.96785	1.68283	1.89759	1.56964	1.7006
0.999839	1.6323	1.58636	2.22821	1.7169	1.94625	1.63765		1.22602	1.5547	1.96635	1.68534	1.89567	1.56986	1.7005
0.999962	1.63196	1.58684	2.22614	1.7174	1.943	1.63788		1.22584	1.55492	1.96252	1.68784	1.89539	1.57064	1.69985
1.00019	1.63172	1.59017	2.22611	1.72109	1.94288	1.63875		1.22574	1.55655	1.96244	1.69079	1.89371	1.5708	1.69964
1.00034	1.63127	1.5978	2.22553	1.72159	1.94048	1.64012		1.22564	1.55686	1.9616	1.69311	1.89297	1.57154	1.69954
1.00037	1.63081	1.5978	2.22512	1.72189	1.94035	1.64095		1.22553	1.55967	1.96017	1.69383	1.89276	1.5723	1.69935
1.00037	1.62916	1.59867	2.22245	1.72673	1.93958	1.64173		1.22545	1.56009	1.9599	1.69447	1.89175	1.57287	1.69923
1.00043	1.62788	1.60051	2.22075	1.7288	1.93941	1.64192		1.22525	1.56386	1.95976	1.69491	1.88981	1.57509	1.69748
1.00078	1.62766	1.6024	2.21896	1.72889	1.93665	1.64373		1.22459	1.56805	1.95967	1.69498	1.88911	1.57623	1.69737
1.00089	1.62701	1.60434	2.21781	1.73033	1.93275	1.64525		1.22451	1.56811	1.95797	1.6976	1.88788	1.57721	1.69455
1.00094	1.62694	1.60689	2.21503	1.73102	1.93243	1.64688		1.22444	1.56928	1.95745	1.69796	1.88763	1.57762	1.69104
1.00135	1.62687	1.60854	2.21474	1.73154	1.9289	1.64957		1.22382	1.56975	1.95634	1.69853	1.88584	1.57837	1.69099
1.00138	1.6266	1.61097	2.213	1.73542	1.9282	1.65359		1.22379	1.56998	1.95234	1.6991	1.88572	1.57903	1.69091
1.0014	1.62494	1.61203	2.2128	1.7393	1.92419	1.65427		1.22338	1.57142	1.95035	1.70007	1.88282	1.57956	1.69033
1.00149	1.62346	1.61294	2.20741	1.74234	1.92327	1.65952		1.22301	1.57393	1.95028	1.70186	1.88267	1.57989	1.68992
1.00154	1.62231	1.61415	2.20471	1.74434	1.91925	1.66014		1.22184	1.57745	1.94911	1.70198	1.88197	1.58169	1.68967
1.0017	1.62231	1.61442	2.20466	1.74476	1.91742	1.66091		1.22171	1.57865	1.94844	1.70252	1.88082	1.5834	1.68934
1.00179	1.62214	1.61518	2.20004	1.74713	1.91525	1.66414		1.22139	1.5794	1.94807	1.70449	1.87971	1.58417	1.68885
1.00191	1.62046	1.61563	2.19316	1.74755	1.91346	1.6665		1.22122	1.58194	1.94769	1.70695	1.87942	1.58439	1.68661
1.00206	1.61996	1.61659	2.18914	1.74805	1.91286	1.6668		1.22115	1.58443	1.94738	1.70702	1.87895	1.58502	1.68631
1.00236	1.61995	1.61884	2.18543	1.75116	1.90733	1.66694		1.22062	1.58513	1.94663	1.70726	1.87829	1.58691	1.68481
1.00258	1.61889	1.6203	2.18413	1.75447	1.90693	1.66703		1.22032	1.58533	1.94351	1.70739	1.8779	1.58734	1.68434
1.00274	1.6185	1.62122	2.18317	1.75574	1.90654	1.67006		1.21953	1.58607	1.94249	1.70775	1.87709	1.58741	1.68433
1.003	1.61793	1.62282	2.1819	1.75734	1.90314	1.67079		1.21885	1.58615	1.94092	1.70809	1.87588	1.58797	1.68406
1.00301	1.61752	1.62325	2.17927	1.75828	1.90314	1.6711		1.21882	1.58644	1.93937	1.70837	1.87487	1.58807	1.68337
1.00331	1.61749	1.62371	2.17614	1.75879	1.90033	1.67171		1.21835	1.58747	1.93705	1.7108	1.87409	1.58807	1.68317
1.00506	1.61705	1.62414	2.17441	1.76023	1.90003	1.67224		1.21803	1.58767	1.93369	1.71274	1.87276	1.58827	1.68031
1.00518	1.61621	1.62473	2.17391	1.7615	1.89818	1.67589		1.218	1.58991	1.93268	1.71364	1.87131	1.58845	1.6789
1.00524	1.61512	1.62627	2.17235	1.76264	1.89515	1.6818		1.2177	1.59205	1.9308	1.71464	1.87074	1.5889	1.67888
1.00616	1.6149	1.62789	2.16855	1.76308	1.89421	1.68275		1.21744	1.59248	1.92957	1.71612	1.87072	1.59033	1.67878
1.00641	1.6117	1.63058	2.1685	1.76512	1.89353	1.68361		1.21715	1.59439	1.92939	1.71668	1.87059	1.59033	1.67874
1.00677	1.61101	1.63101	2.1678	1.76729	1.89142	1.6841		1.2164	1.59499	1.92793	1.71743	1.86954	1.59047	1.67832
1.00682	1.60983	1.63131	2.16665	1.77063	1.88987	1.68567		1.21596	1.59814	1.92744	1.71867	1.86801	1.59054	1.67721
1.00701	1.60904	1.63407	2.16539	1.7713	1.88961	1.68721		1.2158	1.59845	1.92644	1.71923	1.86775	1.59224	1.67704
1.00728	1.60897	1.63462	2.15487	1.7742	1.88936	1.68735		1.21495	1.59958	1.92597	1.72008	1.86705	1.59293	1.67639
1.00741	1.60816	1.63605	2.15365	1.77585	1.88614	1.69262		1.21476	1.60028	1.92522	1.72116	1.8665	1.59329	1.67447
1.00772	1.60814	1.63625	2.15256	1.77667	1.88332	1.69921		1.21443	1.60104	1.92513	1.72225	1.86326	1.59514	1.67362
1.00863	1.60699	1.63822	2.14985	1.77887	1.88287	1.69945		1.21384	1.60167	1.92483	1.73017	1.86289	1.59543	1.67167
1.00895	1.60626	1.64101	2.14602	1.77889	1.88278	1.70048		1.21384	1.60287	1.92478	1.73021	1.86231	1.59685	1.67159
1.00915	1.60555	1.64126	2.14408	1.77921	1.87908	1.70077		1.21381	1.60672	1.92405	1.73119	1.86217	1.599	1.67147
1.00918	1.6053	1.6424	2.14145	1.77972	1.87679	1.70148		1.21371	1.60885	1.92304	1.73212	1.86044	1.60155	1.67054
1.00938	1.60423	1.64433	2.13928	1.78115	1.8735	1.7024		1.2137	1.60925	1.92284	1.73498	1.8604	1.60302	1.67051
1.0095	1.60338	1.64531	2.13746	1.78212	1.8705	1.70288		1.21358	1.61063	1.92213	1.7351	1.85918	1.60319	1.66956
1.00951	1.60274	1.64575	2.12929	1.78342	1.86863	1.7035		1.21347	1.61124	1.92007	1.7373	1.85864	1.60371	1.66627
1.01024	1.60234	1.64671	2.12758	1.78386	1.86734	1.70591		1.21293	1.61184	1.91884	1.7383	1.85834	1.60604	1.66536
1.0109	1.6003	1.64835	2.1197	1.78535	1.86608	1.71156		1.21293	1.61228	1.91819	1.7386	1.85803	1.60688	1.66493
1.01202	1.5994	1.64865	2.1171	1.78563	1.8633	1.7124		1.21252	1.61339	1.91748	1.73936	1.85801	1.60733	1.66345
1.01219	1.59928	1.65129	2.1081	1.7859	1.8584	1.7145		1.21243	1.61411	1.91659	1.74134	1.85793	1.60805	1.66263
1.01246	1.59877	1.65187	2.10721	1.7871	1.85688	1.71725		1.21206	1.61629	1.91656	1.74149	1.85761	1.6083	1.66257
1.01254	1.59839	1.65191	2.10528	1.78819	1.85672	1.71802		1.21197	1.61735	1.91583	1.74277	1.85723	1.60859	1.66169
1.0136	1.59834	1.65521	2.10473	1.78838	1.85551	1.71963		1.21177	1.61821	1.91539	1.74293	1.85402	1.60878	1.66081
1.01462	1.59781	1.65601	2.10435	1.79062	1.85534	1.72008		1.21146	1.61847	1.91469	1.74382	1.85399	1.60885	1.66
1.01468	1.59574	1.65624	2.09443	1.79093	1.8532	1.72118		1.21145	1.6201	1.91142	1.74431	1.85253	1.6097	1.65944
1.01485	1.59567	1.65838	2.09423	1.79303	1.85214	1.72132		1.21111	1.62061	1.90975	1.7466	1.85177	1.60982	1.65807
1.01489	1.59509	1.66324	2.09158	1.79384	1.85213	1.72328		1.21086	1.62212	1.9091	1.74683	1.85153	1.61062	1.65778
1.01493	1.59292	1.66439	2.08971	1.79444	1.84871	1.72373		1.21082	1.62227	1.90803	1.74804	1.85121	1.6134	1.65738
1.01499	1.58861	1.66525	2.08628	1.79502	1.84813	1.72419		1.21068	1.62352	1.90787	1.75064	1.85016	1.61352	1.65721
1.01534	1.58318	1.66535	2.08592	1.79716	1.84669	1.7285		1.21062	1.62391	1.90712	1.75075	1.85002	1.6141	1.65702
1.01543	1.58239	1.66603	2.08135	1.79947	1.84533	1.72917		1.20981	1.62417	1.90699	1.75258	1.8495	1.61454	1.65681
1.0155	1.58092	1.66707	2.08118	1.79961	1.84271	1.7296		1.20972	1.62941	1.90603	1.75392	1.8494	1.61549	1.65653
1.01559	1.5798	1.67329	2.0762	1.80198	1.8422	1.73105		1.20903	1.63096	1.90327	1.75461	1.84881	1.61592	1.6552
1.01561	1.57958	1.67422	2.07271	1.80534	1.84133	1.73118		1.2088	1.6317	1.90283	1.75563	1.84606	1.61791	1.65503
1.0161	1.57872	1.67535	2.07062	1.80568	1.8405	1.73119		1.20871	1.63736	1.90004	1.75727	1.84591	1.61814	1.65474
1.01627	1.57861	1.67628	2.06503	1.80701	1.84029	1.73139		1.20862	1.63864	1.89943	1.7581	1.84492	1.61979	1.65405
1.01633	1.57846	1.67742	2.06456	1.8108	1.83338	1.73361		1.20783	1.63981	1.89888	1.75914	1.84475	1.62103	1.65369
1.01646	1.57832	1.67807	2.06265	1.81581	1.82784	1.73369		1.20776	1.64045	1.89765	1.75979	1.84436	1.62209	1.65284
1.01662	1.57685	1.68396	2.06204	1.81852	1.82173	1.73423		1.20768	1.6444	1.89737	1.76112	1.84417	1.62213	1.65216
1.01678	1.57682	1.68453	2.05737	1.8199	1.82024	1.73633		1.20762	1.64479	1.89716	1.76162	1.84248	1.62263	1.65214
1.01679	1.57601	1.68834	2.05404	1.82018	1.81599	1.73693		1.20708	1.64724	1.89643	1.76731	1.84109	1.62354	1.65166
1.01686	1.57434	1.69047	2.05329	1.82125	1.81169	1.73768		1.20694	1.64803	1.89493	1.76744	1.84077	1.62368	1.65138
1.01699	1.57426	1.69223	2.05277	1.82135	1.80965	1.7404		1.2067	1.64902	1.89466	1.76852	1.83728	1.62409	1.65137
1.01703	1.57217	1.69422	2.05105	1.8234	1.80965	1.74282		1.20639	1.65161	1.89449	1.76904	1.83478	1.62423	1.64834
1.01703	1.5716	1.69494	2.04911	1.8237	1.80944	1.74519		1.20599	1.65239	1.89393	1.77061	1.8346	1.62578	1.64828
1.01729	1.57125	1.69728	2.04818	1.82568	1.8087	1.74654		1.20575	1.6561	1.89283	1.77133	1.83439	1.62833	1.64768
1.01747	1.56995	1.69835	2.04786	1.82575	1.80694	1.74991		1.20533	1.65746	1.88999	1.77178	1.83394	1.62946	1.64757
1.01776	1.56954	1.69862	2.04575	1.82579	1.80153	1.75157		1.20522	1.65774	1.88915	1.77184	1.83375	1.62965	1.64736
1.01781	1.56924	1.70023	2.04051	1.82642	1.80018	1.7526		1.20515	1.65872	1.88784	1.77704	1.83303	1.63033	1.64631
1.01792	1.56873	1.70203	2.04049	1.82834	1.79909	1.75416		1.20491	1.66022	1.88771	1.7779	1.832	1.63052	1.64621
1.01814	1.56759	1.70461	2.03757	1.82835	1.79786	1.75426		1.20433	1.66287	1.88753	1.77858	1.83186	1.63175	1.64606
1.01869	1.56716	1.70521	2.03542	1.83034	1.79582	1.7559		1.20433	1.66532	1.88664	1.77947	1.83152	1.63195	1.64595
1.0197	1.56441	1.70629	2.03531	1.83378	1.79485	1.75781		1.20397	1.66568	1.88545	1.7798	1.83122	1.63247	1.64485
1.01987	1.56358	1.70701	2.02937	1.83557	1.79398	1.75889		1.2038	1.66582	1.88376	1.78003	1.83093	1.63261	1.64456
1.01992	1.56207	1.70841	2.02896	1.8358	1.79316	1.76113		1.20369	1.66628	1.88352	1.78165	1.8305	1.63287	1.64298
1.01996	1.5618	1.70891	2.02664	1.83668	1.79202	1.76291		1.20365	1.66729	1.88267	1.78191	1.82859	1.6339	1.6401
1.02042	1.56166	1.70955	2.02279	1.83717	1.79087	1.7647		1.20348	1.66766	1.88255	1.78645	1.82705	1.63434	1.63931
1.02118	1.55963	1.71118	2.01984	1.83775	1.78623	1.76985		1.20339	1.66824	1.88147	1.78717	1.82581	1.63818	1.63897
1.02148	1.55958	1.71183	2.01597	1.83975	1.78559	1.77114		1.2032	1.67101	1.88131	1.78761	1.82566	1.63838	1.6355
1.02152	1.55909	1.71593	2.01159	1.84065	1.78052	1.7713		1.20313	1.67116	1.87724	1.78863	1.82559	1.63849	1.63507
1.02157	1.55723	1.71677	2.00592	1.8417	1.7798	1.77285		1.20299	1.67177	1.87676	1.78894	1.82508	1.63961	1.63374
1.02221	1.55592	1.71914	2.00425	1.8421	1.77602	1.77531		1.2028	1.67195	1.87398	1.78913	1.8232	1.6401	1.63278
1.02258	1.55555	1.72015	2.00026	1.84402	1.77588	1.77544		1.20273	1.67216	1.87382	1.79042	1.81961	1.64058	1.63099
1.02263	1.55532	1.72134	1.9973	1.84456	1.77583	1.77565		1.20257	1.67301	1.87214	1.7921	1.81953	1.64084	1.63076
1.0228	1.55317	1.72192	1.9962	1.84618	1.77299	1.77623		1.20255	1.67372	1.87121	1.79343	1.8195	1.64213	1.6296
1.02318	1.55295	1.7226	1.99602	1.85135	1.77216	1.77637		1.20254	1.67415	1.87081	1.79377	1.81946	1.64219	1.6286
1.02391	1.55291	1.72379	1.99547	1.85184	1.77039	1.77879		1.2025	1.67416	1.86998	1.79426	1.8183	1.64248	1.62842
1.02447	1.55243	1.72701	1.99484	1.8522	1.76739	1.78599		1.20221	1.67473	1.86943	1.79871	1.81758	1.64327	1.62657
1.02489	1.55121	1.72706	1.99227	1.85489	1.76735	1.78617		1.2022	1.67493	1.86935	1.80073	1.81753	1.64458	1.6264
1.02615	1.55061	1.72714	1.98957	1.85836	1.75998	1.78663		1.20193	1.67564	1.86929	1.80262	1.81717	1.64497	1.6255
1.0266	1.54999	1.72956	1.98706	1.8585	1.75756	1.78725		1.20187	1.67617	1.86734	1.80297	1.81694	1.64503	1.62519
1.0268	1.54996	1.72967	1.98635	1.85895	1.75738	1.78827		1.20164	1.67621	1.86669	1.80496	1.81652	1.64517	1.62359
1.02717	1.54993	1.73171	1.98591	1.85929	1.75723	1.79456		1.20089	1.67648	1.86656	1.8057	1.81635	1.64573	1.6222
1.02739	1.54946	1.7331	1.98162	1.86206	1.75392	1.79474		1.20065	1.67705	1.86598	1.80678	1.81612	1.64654	1.62187
1.02792	1.54936	1.7335	1.97513	1.86616	1.74964	1.79484		1.2004	1.67801	1.86538	1.8097	1.81526	1.64792	1.62137
1.02856	1.54821	1.73435	1.96862	1.86656	1.74864	1.79592		1.20011	1.67818	1.86451	1.8108	1.81221	1.64834	1.62131
1.02937	1.54796	1.73713	1.96723	1.86764	1.74621	1.79597		1.19964	1.67942	1.86348	1.81107	1.81065	1.64896	1.62003
1.02952	1.54791	1.7386	1.96415	1.87247	1.74604	1.80039		1.1996	1.67974	1.86306	1.81284	1.80959	1.6495	1.61942
1.02953	1.54756	1.73917	1.96359	1.87318	1.74597	1.80073		1.19952	1.68004	1.86214	1.81348	1.80935	1.64953	1.61844
1.02967	1.54724	1.73991	1.96148	1.87418	1.74468	1.80314		1.19912	1.68102	1.8616	1.81399	1.80858	1.64965	1.61819
1.02993	1.54709	1.74038	1.95907	1.87431	1.74238	1.80357		1.19899	1.6846	1.86133	1.81539	1.80819	1.64968	1.61619
1.02996	1.54683	1.74041	1.95809	1.87475	1.74209	1.8038		1.19843	1.68542	1.86113	1.81596	1.80693	1.65038	1.61563
1.03048	1.54521	1.74111	1.95742	1.87598	1.73857	1.80472		1.19825	1.68618	1.85856	1.81655	1.80686	1.65117	1.61484
1.03102	1.54461	1.7422	1.95483	1.878	1.73753	1.80499		1.1979	1.6887	1.85839	1.8169	1.80686	1.65132	1.61389
1.0315	1.54398	1.74559	1.94738	1.87956	1.73741	1.81006		1.19762	1.68872	1.85831	1.81772	1.80605	1.6516	1.61168
1.03151	1.54263	1.74566	1.94198	1.88008	1.73561	1.811		1.19757	1.68898	1.85693	1.81827	1.80603	1.65251	1.61154
1.03177	1.54221	1.74611	1.94189	1.88034	1.7355	1.81132		1.19755	1.68911	1.8555	1.81879	1.80512	1.65253	1.61136
1.03206	1.54123	1.74648	1.93967	1.88063	1.73375	1.81142		1.1975	1.68925	1.8554	1.81905	1.80506	1.6527	1.611
1.03215	1.54017	1.74677	1.93616	1.88346	1.7337	1.81228		1.19741	1.68976	1.85487	1.81907	1.8019	1.65291	1.61034
1.03215	1.53848	1.74871	1.93513	1.88779	1.73314	1.81243		1.19736	1.69065	1.85401	1.81948	1.80144	1.65382	1.60992
1.03247	1.53711	1.74884	1.93436	1.88857	1.7326	1.81323		1.19715	1.69159	1.85233	1.82162	1.80016	1.66183	1.60877
1.03256	1.53499	1.75016	1.93269	1.88916	1.72961	1.81337		1.19684	1.69838	1.84765	1.82525	1.79986	1.66216	1.60836
1.03257	1.53427	1.75062	1.93101	1.89034	1.72714	1.8167		1.19653	1.69848	1.84727	1.827	1.79982	1.66354	1.60765
1.0327	1.53224	1.75063	1.92766	1.89614	1.72606	1.81858		1.19634	1.69883	1.84577	1.83083	1.79971	1.6651	1.60531
1.03299	1.53224	1.75221	1.92693	1.89681	1.72571	1.81913		1.19632	1.69888	1.84437	1.83088	1.79967	1.66558	1.60452
1.03303	1.5314	1.754	1.92636	1.8976	1.72508	1.82207		1.1963	1.69907	1.84191	1.83187	1.79897	1.666	1.60445
1.03315	1.53076	1.75407	1.9246	1.89885	1.72186	1.82601		1.19597	1.70097	1.83823	1.83403	1.79885	1.66619	1.60389
1.0333	1.53063	1.75791	1.92441	1.90104	1.72038	1.83416		1.19568	1.70114	1.83773	1.83479	1.79844	1.66645	1.60277
1.03335	1.52989	1.76097	1.92368	1.90296	1.71706	1.83574		1.19531	1.70187	1.8362	1.83702	1.79781	1.66646	1.6022
1.03336	1.52946	1.76232	1.92308	1.90331	1.71698	1.83675		1.19528	1.7031	1.83523	1.83721	1.79723	1.66695	1.60186
1.03344	1.52932	1.76328	1.91761	1.90477	1.71568	1.83733		1.19511	1.70369	1.83403	1.8375	1.79685	1.66875	1.60146
1.03355	1.52911	1.76415	1.91695	1.90747	1.71565	1.83898		1.19463	1.70433	1.83297	1.83758	1.79678	1.67243	1.60082
1.03382	1.52716	1.76419	1.91668	1.90958	1.71532	1.83992		1.19463	1.7044	1.83081	1.83821	1.79653	1.67248	1.59951
1.03388	1.52661	1.76575	1.91479	1.91183	1.71513	1.84392		1.19449	1.70789	1.83063	1.83846	1.79499	1.67274	1.59927
1.03395	1.52615	1.7677	1.9117	1.91184	1.715	1.84624		1.19431	1.70889	1.83055	1.8399	1.79464	1.67316	1.59888
1.03425	1.52582	1.76783	1.90724	1.9131	1.71336	1.84808		1.19407	1.71007	1.82717	1.84034	1.79425	1.67382	1.59822
1.03427	1.52565	1.76787	1.90699	1.91533	1.71124	1.84844		1.19403	1.71123	1.8263	1.84109	1.79242	1.67572	1.5978
1.03432	1.52258	1.76852	1.90661	1.9158	1.71069	1.84926		1.19375	1.71171	1.82346	1.84567	1.79231	1.67837	1.59768
1.03457	1.52162	1.76866	1.9038	1.91805	1.70857	1.84987		1.1937	1.71289	1.8231	1.84635	1.78952	1.67896	1.59413
1.03463	1.52134	1.7701	1.90292	1.91833	1.70512	1.85031		1.19368	1.71433	1.82294	1.85133	1.7894	1.67964	1.59344
1.03467	1.52109	1.77102	1.90142	1.9201	1.70424	1.85679		1.1933	1.71498	1.82253	1.85209	1.7893	1.67976	1.59316
1.035	1.52064	1.77128	1.89824	1.92169	1.70257	1.86026		1.19322	1.715	1.82245	1.85273	1.78643	1.68241	1.59197
1.03503	1.52053	1.77136	1.89688	1.92232	1.70235	1.86271		1.19255	1.7161	1.82238	1.8546	1.78638	1.68273	1.59068
1.03538	1.52007	1.77266	1.89581	1.92476	1.70148	1.86278		1.19247	1.71788	1.81992	1.85615	1.78608	1.68335	1.59042
1.0355	1.52005	1.78047	1.89264	1.92524	1.70059	1.8629		1.19214	1.72092	1.81919	1.85803	1.78503	1.68429	1.59
1.03595	1.51915	1.78055	1.89194	1.9257	1.69911	1.86498		1.19186	1.72112	1.81894	1.85833	1.78473	1.68472	1.58996
1.03631	1.51887	1.78455	1.88915	1.92576	1.69793	1.86664		1.19097	1.72508	1.8189	1.85848	1.78388	1.68527	1.58937
1.0368	1.51631	1.78478	1.88611	1.93008	1.69626	1.86808		1.19073	1.72515	1.81873	1.8585	1.78254	1.68599	1.58784
1.03696	1.51614	1.78577	1.88566	1.9322	1.69494	1.86826		1.19061	1.72558	1.81867	1.8594	1.78249	1.69041	1.58765
1.03735	1.51599	1.78592	1.88538	1.93636	1.69391	1.87243		1.19003	1.7273	1.81673	1.86032	1.78198	1.6929	1.58759
1.0375	1.51482	1.78827	1.88513	1.93734	1.69376	1.87245		1.18999	1.72901	1.81666	1.8644	1.78155	1.69304	1.58738
1.03898	1.5135	1.78898	1.88286	1.94079	1.69139	1.87282		1.18998	1.73095	1.81603	1.86453	1.7813	1.69377	1.58669
1.03934	1.51241	1.78981	1.88194	1.94139	1.69096	1.87314		1.18989	1.7312	1.81527	1.8677	1.78095	1.69421	1.58583
1.03942	1.51234	1.79027	1.87977	1.94182	1.68766	1.87348		1.18957	1.73138	1.81485	1.86775	1.78084	1.69433	1.58547
1.03944	1.51216	1.791	1.87951	1.94205	1.68527	1.8755		1.18941	1.73217	1.81446	1.86898	1.78043	1.69756	1.58537
1.03952	1.51206	1.79195	1.87892	1.94367	1.68524	1.8782		1.18919	1.73348	1.8117	1.86907	1.7802	1.69961	1.5851
1.03966	1.5107	1.79377	1.87861	1.9489	1.68483	1.87903		1.18908	1.73374	1.81144	1.86983	1.77955	1.70054	1.58416
1.0397	1.51044	1.79472	1.87397	1.95095	1.68338	1.88128		1.18903	1.73418	1.81036	1.86983	1.77927	1.70054	1.58412
1.03979	1.50978	1.79764	1.87024	1.95226	1.68117	1.88293		1.18902	1.73495	1.81017	1.87137	1.77745	1.70121	1.58239
1.0403	1.50852	1.79894	1.87017	1.95309	1.67902	1.88296		1.18895	1.73756	1.80916	1.87296	1.77563	1.7023	1.58122
1.04037	1.50774	1.80639	1.86898	1.95658	1.67883	1.88348		1.18855	1.73937	1.80844	1.87301	1.77324	1.70285	1.58113
1.04052	1.50746	1.80762	1.86494	1.95699	1.6782	1.88376		1.18836	1.73993	1.8075	1.8733	1.77306	1.70333	1.5804
1.0409	1.50729	1.8077	1.86012	1.96329	1.67692	1.88553		1.18829	1.74004	1.80738	1.87496	1.7728	1.70385	1.58035
1.04104	1.50688	1.81368	1.85933	1.96461	1.67321	1.88621		1.18802	1.7426	1.80674	1.87498	1.77251	1.70406	1.57993
1.04144	1.50626	1.81514	1.8593	1.96511	1.66953	1.88675		1.18801	1.7433	1.80634	1.87579	1.76992	1.70431	1.57952
1.0418	1.50611	1.81806	1.85765	1.9661	1.66882	1.88874		1.18788	1.74432	1.80562	1.8766	1.76986	1.70533	1.57862
1.04182	1.50552	1.81959	1.85633	1.96879	1.6684	1.89645		1.1878	1.74527	1.80542	1.87737	1.76895	1.70599	1.57806
1.04185	1.50483	1.82018	1.85559	1.97242	1.66769	1.89788		1.18771	1.74571	1.80413	1.87744	1.76849	1.70654	1.57789
1.04209	1.50296	1.82087	1.85464	1.97367	1.66524	1.90471		1.18768	1.74609	1.80346	1.87745	1.76848	1.70687	1.57779
1.04274	1.50252	1.82157	1.85309	1.97611	1.66471	1.90492		1.18767	1.74658	1.80234	1.87823	1.76777	1.70809	1.57689
1.04296	1.50163	1.82165	1.85276	1.9774	1.66258	1.90517		1.1872	1.74689	1.80168	1.87886	1.766	1.70943	1.57499
1.04297	1.50111	1.82224	1.85179	1.97776	1.65964	1.90551		1.1871	1.74695	1.80129	1.88133	1.76497	1.71153	1.57475
1.04323	1.50106	1.82235	1.849	1.97972	1.65931	1.90991		1.18704	1.74774	1.79993	1.88239	1.76243	1.71155	1.5747
1.04339	1.50101	1.82276	1.84895	1.98041	1.65845	1.91621		1.18675	1.74932	1.79937	1.88296	1.7622	1.71548	1.57412
1.04403	1.5005	1.82379	1.84761	1.98279	1.65836	1.9174		1.18654	1.75059	1.79917	1.88312	1.76214	1.71623	1.57379
1.04417	1.49983	1.82753	1.84742	1.98505	1.65796	1.91808		1.18646	1.7536	1.79904	1.88646	1.76187	1.71651	1.57351
1.04446	1.49958	1.8276	1.84663	1.99874	1.65582	1.91863		1.18633	1.75594	1.79757	1.88744	1.76155	1.71735	1.57196
1.04504	1.4995	1.8299	1.84422	1.99894	1.65554	1.91927		1.18628	1.75732	1.79455	1.88906	1.75762	1.71875	1.57162
1.04531	1.49926	1.831	1.84263	2.00039	1.65531	1.92292		1.18624	1.75758	1.79261	1.88947	1.75625	1.71886	1.57068
1.04548	1.49902	1.83415	1.84173	2.00136	1.65531	1.92318		1.18589	1.7597	1.78967	1.88964	1.75563	1.71987	1.56959
1.04553	1.49757	1.83444	1.84092	2.00202	1.65398	1.92577		1.18589	1.76045	1.78873	1.88978	1.75543	1.71996	1.56652
1.04562	1.49756	1.83535	1.83796	2.00235	1.65263	1.92839		1.18584	1.76078	1.78861	1.89202	1.75139	1.72053	1.56649
1.04608	1.49647	1.83546	1.83642	2.00298	1.65082	1.92872		1.1858	1.76138	1.78821	1.89425	1.75024	1.72088	1.56346
1.04609	1.49647	1.84123	1.83388	2.00463	1.64782	1.93004		1.18572	1.76178	1.78671	1.89525	1.7499	1.72348	1.56331
1.0461	1.49628	1.84621	1.82128	2.00568	1.64601	1.93064		1.18534	1.76268	1.78589	1.89707	1.74868	1.72386	1.56276
1.04662	1.49597	1.84724	1.81129	2.00689	1.64426	1.93212		1.18494	1.76269	1.78514	1.89732	1.74769	1.7247	1.56091
1.04664	1.49501	1.84939	1.81098	2.00757	1.64395	1.93532		1.18492	1.76365	1.78296	1.89771	1.74652	1.72551	1.56056
1.0469	1.49439	1.85004	1.8092	2.00969	1.64323	1.93595		1.18429	1.76536	1.77925	1.90317	1.74641	1.72553	1.56031
1.04691	1.49377	1.85054	1.80559	2.01576	1.64299	1.936		1.18421	1.76616	1.77864	1.90353	1.74454	1.7264	1.55953
1.04704	1.49352	1.85224	1.8049	2.02082	1.64236	1.93627		1.18404	1.76621	1.77382	1.90363	1.74405	1.72666	1.55803
1.04715	1.49242	1.85286	1.8036	2.02329	1.64074	1.94001		1.1838	1.76676	1.77378	1.90836	1.74379	1.72735	1.5575
1.04744	1.49155	1.85575	1.80329	2.02339	1.64036	1.94052		1.18371	1.76751	1.77335	1.90848	1.74261	1.7285	1.55464
1.04752	1.49113	1.85773	1.80187	2.02444	1.63935	1.94136		1.1836	1.76771	1.77332	1.90899	1.74149	1.7293	1.55443
1.04754	1.49107	1.85837	1.80125	2.02451	1.63853	1.94151		1.18302	1.76796	1.77312	1.90918	1.74118	1.72996	1.55262
1.04757	1.49094	1.85869	1.8006	2.02603	1.63721	1.94156		1.18296	1.76853	1.77265	1.91111	1.73902	1.73032	1.55249
1.04769	1.49012	1.85976	1.79976	2.02836	1.6334	1.94178		1.18294	1.76893	1.76956	1.91213	1.73898	1.7307	1.5523
1.04775	1.48969	1.86216	1.79714	2.02863	1.6299	1.94265		1.1829	1.77054	1.76955	1.91333	1.73777	1.73075	1.54664
1.04818	1.48808	1.86358	1.79667	2.02867	1.62926	1.94341		1.18254	1.7716	1.76898	1.91345	1.73757	1.73098	1.54652
1.04829	1.48775	1.86498	1.7961	2.03427	1.62922	1.94598		1.18245	1.77164	1.76809	1.91484	1.73476	1.73358	1.54554
1.04841	1.4861	1.86526	1.79151	2.03672	1.62708	1.94606		1.18222	1.77205	1.76761	1.91534	1.73397	1.73386	1.54529
1.04842	1.48554	1.86839	1.79072	2.03693	1.62609	1.95353		1.18176	1.77366	1.76372	1.91577	1.7337	1.73442	1.54518
1.04893	1.48553	1.86895	1.78951	2.03703	1.62497	1.95564		1.18165	1.77443	1.76285	1.91625	1.7291	1.73521	1.5445
1.04899	1.48531	1.87041	1.78567	2.04068	1.62312	1.95666		1.18158	1.77467	1.76275	1.91694	1.72869	1.73528	1.54413
1.04913	1.48462	1.87331	1.77872	2.04109	1.62107	1.96443		1.18113	1.77713	1.75995	1.91696	1.72759	1.73692	1.54409
1.04951	1.48458	1.8761	1.77756	2.04405	1.61893	1.96629		1.18087	1.77731	1.7592	1.92013	1.7265	1.73715	1.54404
1.04956	1.47984	1.87938	1.77422	2.04448	1.61698	1.96745		1.18086	1.77877	1.75805	1.92087	1.72586	1.73757	1.54361
1.04976	1.47945	1.88469	1.77379	2.04645	1.61619	1.96823		1.18066	1.77946	1.75585	1.92193	1.7236	1.73848	1.54339
1.04976	1.4783	1.88524	1.76266	2.04878	1.61458	1.96833		1.18064	1.78054	1.75521	1.92235	1.72124	1.74371	1.54263
1.04977	1.47774	1.89075	1.75837	2.05134	1.61437	1.9684		1.18044	1.78074	1.75516	1.92242	1.71989	1.74479	1.54199
1.04998	1.47746	1.89408	1.75632	2.05657	1.61232	1.96979		1.18008	1.78171	1.75421	1.92378	1.71551	1.74642	1.54181
1.04999	1.47646	1.89522	1.75584	2.05845	1.61223	1.97121		1.18007	1.78184	1.75363	1.92543	1.71505	1.74726	1.54166
1.05016	1.47544	1.89619	1.7534	2.06116	1.61152	1.97123		1.18	1.78298	1.75228	1.92572	1.71333	1.74785	1.54129
1.05017	1.47424	1.89751	1.75235	2.06319	1.61142	1.97529		1.17999	1.78477	1.75205	1.92714	1.713	1.74806	1.54065
1.05017	1.47372	1.90132	1.7519	2.06357	1.60591	1.97958		1.17987	1.78483	1.75108	1.92847	1.71238	1.74836	1.54051
1.0502	1.47318	1.90326	1.74966	2.06858	1.59802	1.9816		1.17986	1.78538	1.75082	1.9321	1.71187	1.74956	1.53979
1.05028	1.473	1.90725	1.74874	2.07005	1.59767	1.98439		1.17946	1.7861	1.74959	1.9322	1.71186	1.75004	1.5395
1.05038	1.47283	1.90965	1.74828	2.07164	1.59634	1.98452		1.17941	1.78611	1.74814	1.93246	1.71165	1.75018	1.53912
1.05039	1.4725	1.91085	1.74482	2.07396	1.59406	1.98535		1.17895	1.78654	1.74609	1.93471	1.71131	1.75133	1.53777
1.05094	1.47211	1.91111	1.74426	2.07585	1.59299	1.98807		1.17871	1.78741	1.73985	1.93482	1.71065	1.75202	1.5377
1.05098	1.47059	1.91126	1.74363	2.07773	1.59169	1.99313		1.17845	1.78813	1.73826	1.93508	1.70813	1.75212	1.53759
1.05098	1.47022	1.9115	1.74246	2.07954	1.58584	1.99915		1.17778	1.78873	1.73662	1.9355	1.70718	1.75264	1.53616
1.05123	1.46842	1.91513	1.74111	2.07981	1.58497	2.00326		1.17759	1.78932	1.73556	1.9363	1.70489	1.75416	1.53525
1.05128	1.46757	1.92372	1.7402	2.08092	1.58339	2.00474		1.17749	1.79522	1.73451	1.93961	1.7036	1.75836	1.535
1.05131	1.46746	1.92413	1.73699	2.08179	1.58322	2.00717		1.1773	1.79626	1.73352	1.94796	1.70346	1.75876	1.53302
1.05135	1.46736	1.92569	1.73512	2.08387	1.58212	2.01209		1.17664	1.79634	1.73318	1.95531	1.70328	1.7589	1.53016
1.05151	1.46623	1.92685	1.73024	2.08447	1.5819	2.01357		1.17656	1.7968	1.7325	1.95549	1.70296	1.75922	1.52888
1.05163	1.46615	1.92828	1.72942	2.0847	1.58008	2.01727		1.17646	1.80058	1.73194	1.95655	1.70285	1.76014	1.52853
1.0518	1.46512	1.92937	1.72934	2.08522	1.57915	2.018		1.1764	1.80071	1.73157	1.9568	1.70249	1.76036	1.52683
1.05247	1.46437	1.92951	1.72697	2.08967	1.57912	2.01816		1.17614	1.80418	1.72913	1.9575	1.70165	1.76056	1.52593
1.05264	1.46352	1.93065	1.71942	2.09033	1.57816	2.01917		1.17588	1.80494	1.72619	1.95761	1.69868	1.76102	1.52584
1.05295	1.46329	1.93379	1.71743	2.09536	1.5778	2.01987		1.17588	1.80687	1.72577	1.95822	1.69774	1.76153	1.52481
1.05362	1.4629	1.93445	1.71604	2.09627	1.57726	2.02117		1.17579	1.80724	1.72467	1.95892	1.69707	1.76168	1.52297
1.05375	1.46248	1.9371	1.71319	2.10074	1.57558	2.02162		1.17563	1.80815	1.72364	1.9596	1.69698	1.76278	1.52277
1.05405	1.46234	1.93821	1.71276	2.10114	1.57422	2.02348		1.1751	1.80854	1.72162	1.9601	1.69692	1.76842	1.52107
1.05409	1.46188	1.94095	1.70774	2.10356	1.57357	2.02411		1.17495	1.80856	1.72154	1.96035	1.69655	1.76961	1.5199
1.05412	1.4618	1.94128	1.70006	2.10569	1.57261	2.0258		1.17495	1.81152	1.72079	1.96049	1.69529	1.77188	1.51949
1.0543	1.46167	1.94129	1.69343	2.10655	1.57035	2.02729		1.17482	1.81195	1.71939	1.96101	1.69525	1.77375	1.51939
1.05571	1.46151	1.94319	1.68805	2.11281	1.56894	2.0275		1.17477	1.81432	1.71842	1.96315	1.69524	1.77722	1.51868
1.05662	1.45929	1.94401	1.68184	2.11283	1.5672	2.02992		1.17475	1.81479	1.71383	1.96327	1.69453	1.77738	1.51825
1.05696	1.45914	1.94856	1.68025	2.11333	1.56679	2.03328		1.17474	1.81496	1.71357	1.96744	1.69199	1.78151	1.51684
1.05696	1.45863	1.9502	1.67516	2.11888	1.56256	2.0345		1.17474	1.81543	1.71233	1.97035	1.69109	1.78266	1.51634
1.05726	1.45803	1.95152	1.67139	2.12006	1.56172	2.03472		1.17438	1.81607	1.70865	1.97135	1.69012	1.78308	1.516
1.05746	1.45722	1.95299	1.66974	2.12451	1.55893	2.03486		1.17409	1.81688	1.70738	1.9766	1.68934	1.78834	1.51515
1.05751	1.457	1.95394	1.66317	2.13013	1.5575	2.04498		1.17398	1.81699	1.70653	1.97698	1.68896	1.78853	1.5149
1.05779	1.45554	1.95729	1.6561	2.13053	1.55506	2.0497		1.17377	1.81815	1.70629	1.97842	1.68872	1.78895	1.51212
1.0588	1.4552	1.9584	1.65569	2.13119	1.55361	2.04999		1.1737	1.81819	1.70576	1.97871	1.68493	1.79263	1.51093
1.05889	1.45501	1.95864	1.65408	2.13134	1.55309	2.05512		1.17337	1.81821	1.70501	1.98164	1.6838	1.79621	1.51022
1.05902	1.455	1.95974	1.65321	2.13264	1.55307	2.05666		1.1733	1.81872	1.70416	1.98174	1.68373	1.79629	1.50947
1.05924	1.45377	1.96011	1.64971	2.13307	1.55243	2.05808		1.17308	1.81915	1.70325	1.98404	1.68304	1.79949	1.50882
1.05925	1.4533	1.96426	1.64626	2.13443	1.55036	2.06451		1.17304	1.81952	1.70266	1.9867	1.6823	1.79958	1.50827
1.05946	1.45318	1.96526	1.64286	2.13471	1.54692	2.06578		1.17296	1.82007	1.6993	1.99163	1.68216	1.79987	1.5079
1.06004	1.45275	1.96689	1.64125	2.13754	1.54421	2.06641		1.17293	1.82164	1.69915	1.99833	1.6803	1.80102	1.50676
1.06005	1.45213	1.97323	1.64017	2.13868	1.53879	2.06645		1.17292	1.82432	1.69795	1.99849	1.67979	1.80154	1.50631
1.06071	1.4515	1.97386	1.6358	2.1409	1.53721	2.06667		1.17282	1.82455	1.69661	1.99963	1.67871	1.80186	1.50611
1.06102	1.4504	1.97821	1.63521	2.14257	1.53287	2.07044		1.17277	1.82535	1.69516	2.00337	1.67617	1.80225	1.50572
1.0619	1.45013	1.97961	1.63503	2.14312	1.53176	2.07285		1.17277	1.82671	1.69422	2.00367	1.67512	1.803	1.50474
1.06216	1.45009	1.97987	1.63021	2.1445	1.53091	2.07592		1.17267	1.82678	1.69367	2.00382	1.67384	1.8035	1.50423
1.06256	1.45006	1.98261	1.62586	2.14451	1.52907	2.07751		1.17266	1.82773	1.69126	2.00419	1.67368	1.80414	1.50406
1.06313	1.44973	1.98637	1.61796	2.14487	1.51721	2.07841		1.1726	1.82811	1.69122	2.00425	1.6729	1.80467	1.50257
1.06324	1.44893	1.98697	1.61761	2.14614	1.51594	2.07863		1.17215	1.8283	1.69075	2.00616	1.67088	1.8051	1.50232
1.06346	1.44879	1.98737	1.61225	2.15183	1.51436	2.0811		1.17202	1.82845	1.68904	2.007	1.66706	1.8092	1.50215
1.06352	1.44707	1.98749	1.60893	2.15251	1.51435	2.08208		1.17161	1.82893	1.68563	2.00811	1.66686	1.80937	1.50167
1.06364	1.4467	1.98845	1.60882	2.15539	1.51414	2.08232		1.1715	1.83057	1.68536	2.00978	1.66679	1.80951	1.50081
1.06364	1.44664	1.98868	1.60658	2.15917	1.5132	2.08334		1.1715	1.8306	1.6847	2.00979	1.66605	1.80984	1.50062
1.06379	1.44482	1.99071	1.60647	2.16057	1.51139	2.08599		1.17137	1.83065	1.68303	2.01074	1.66508	1.81043	1.50027
1.06409	1.44472	1.99425	1.59646	2.16469	1.50761	2.08614		1.17131	1.83136	1.6822	2.0122	1.66457	1.81101	1.49951
1.06423	1.44433	1.99448	1.59482	2.16499	1.50673	2.08721		1.17082	1.83141	1.68129	2.0143	1.66399	1.81255	1.49939
1.06445	1.4442	1.9968	1.59034	2.16604	1.50196	2.09168		1.17079	1.83171	1.68018	2.01644	1.662	1.8138	1.49934
1.06475	1.44209	1.99708	1.59009	2.16886	1.50016	2.09318		1.17078	1.83294	1.67947	2.02381	1.66121	1.81755	1.49901
1.06533	1.44134	1.99773	1.58856	2.17222	1.49985	2.09705		1.17067	1.83352	1.67823	2.02506	1.66034	1.81804	1.49815
1.06555	1.44132	1.99962	1.58658	2.17412	1.49791	2.09765		1.17066	1.83355	1.67545	2.02544	1.65826	1.81845	1.49636
1.06568	1.44093	2.00197	1.58553	2.1754	1.49718	2.09815		1.17064	1.83438	1.6743	2.03259	1.65675	1.8196	1.49543
1.06591	1.43829	2.00344	1.58399	2.17588	1.49646	2.09819		1.17063	1.83464	1.67367	2.0332	1.65659	1.82295	1.49476
1.06619	1.43795	2.00367	1.58221	2.17627	1.49504	2.10151		1.17024	1.8353	1.67295	2.03474	1.6521	1.82328	1.4947
1.06631	1.43736	2.00668	1.57653	2.1773	1.49207	2.10571		1.17012	1.83614	1.6704	2.04082	1.65172	1.82332	1.49414
1.0667	1.43665	2.00921	1.57557	2.17839	1.49058	2.11023		1.17012	1.83619	1.67029	2.04256	1.64975	1.82512	1.49289
1.06681	1.43646	2.01029	1.57144	2.17906	1.48971	2.11066		1.17007	1.83727	1.66845	2.04663	1.64884	1.82514	1.49254
1.06702	1.43589	2.01239	1.56937	2.18048	1.47745	2.11639		1.16985	1.8376	1.66792	2.04763	1.64774	1.82667	1.49169
1.06739	1.43483	2.01241	1.56871	2.18101	1.47436	2.11727		1.16963	1.83818	1.66775	2.05035	1.64767	1.82742	1.49143
1.06747	1.43395	2.01631	1.56036	2.18126	1.46861	2.11759		1.16902	1.8384	1.66708	2.05095	1.6464	1.82843	1.49141
1.06761	1.4322	2.02031	1.5562	2.18208	1.46764	2.12279		1.16893	1.83855	1.66676	2.05459	1.64582	1.83249	1.49004
1.06792	1.43202	2.02126	1.55364	2.18604	1.46698	2.12293		1.16883	1.83932	1.66533	2.05488	1.64497	1.83264	1.48973
1.06799	1.4315	2.02218	1.55169	2.18906	1.46621	2.12781		1.16868	1.8399	1.66441	2.05787	1.64474	1.83465	1.48884
1.068	1.4314	2.0235	1.55043	2.19083	1.46436	2.12811		1.16832	1.84071	1.66237	2.05893	1.64348	1.83974	1.48871
1.06809	1.43108	2.02499	1.54999	2.19209	1.46367	2.12941		1.16819	1.84075	1.66128	2.06227	1.64232	1.84176	1.48865
1.0682	1.43098	2.02512	1.54933	2.19275	1.46102	2.12949		1.16791	1.84273	1.66018	2.06362	1.64088	1.84285	1.488
1.06832	1.43055	2.02651	1.54703	2.19276	1.45672	2.1321		1.1678	1.84383	1.65956	2.06423	1.64071	1.84376	1.48679
1.06848	1.43038	2.02814	1.54685	2.19296	1.45493	2.13381		1.16741	1.84437	1.65736	2.06538	1.64042	1.84467	1.48655
1.06849	1.4302	2.02897	1.54392	2.19548	1.45183	2.13418		1.16739	1.84659	1.65414	2.06888	1.64036	1.84501	1.4864
1.06918	1.43013	2.0319	1.54159	2.19612	1.45178	2.13644		1.16731	1.84761	1.64976	2.07443	1.64021	1.8466	1.48478
1.06988	1.4293	2.03268	1.53771	2.20035	1.44969	2.13927		1.16716	1.8477	1.64808	2.07555	1.63935	1.84803	1.48465
1.07004	1.42921	2.03304	1.53537	2.2036	1.44614	2.14082		1.16711	1.8479	1.64371	2.077	1.63917	1.84845	1.48453
1.07082	1.4291	2.03364	1.53471	2.20661	1.44585	2.14471		1.16701	1.84893	1.64321	2.08937	1.63687	1.84894	1.484
1.07094	1.42823	2.04009	1.53445	2.2083	1.44483	2.14568		1.16697	1.8491	1.64038	2.09237	1.63496	1.84941	1.48262
1.07098	1.42817	2.04108	1.52956	2.2128	1.44184	2.14746		1.16673	1.84924	1.63942	2.09366	1.63415	1.85127	1.48211
1.07139	1.42763	2.04203	1.52838	2.21399	1.43904	2.14774		1.16661	1.84961	1.63938	2.09614	1.63396	1.85296	1.47964
1.07142	1.42556	2.04526	1.52497	2.21738	1.43829	2.14817		1.16659	1.84986	1.63935	2.09762	1.63074	1.85476	1.47957
1.07155	1.42464	2.04721	1.52371	2.22371	1.43756	2.15663		1.16658	1.85115	1.63603	2.09791	1.63008	1.85522	1.47924
1.07165	1.42451	2.048	1.52356	2.22454	1.43654	2.15758		1.16637	1.85345	1.6344	2.10609	1.6286	1.85534	1.47923
1.07182	1.42331	2.04841	1.52354	2.22588	1.43367	2.16273		1.16592	1.85483	1.63287	2.10748	1.62642	1.85629	1.47873
1.07201	1.42156	2.05198	1.52285	2.23345	1.42618	2.16354		1.16573	1.85519	1.63275	2.10887	1.62588	1.85884	1.47807
1.07209	1.42135	2.05293	1.51424	2.23739	1.4259	2.16745		1.1655	1.85555	1.63241	2.11606	1.62532	1.86008	1.4776
1.07252	1.42047	2.05384	1.51401	2.24152	1.42285	2.16766		1.16536	1.85645	1.63116	2.11674	1.62309	1.86031	1.47683
1.07262	1.42026	2.06524	1.5107	2.24163	1.41886	2.17368		1.16532	1.8575	1.63106	2.12348	1.61976	1.86091	1.47542
1.07271	1.41752	2.06553	1.50484	2.24216	1.41054	2.17402		1.16523	1.85828	1.6304	2.1235	1.61942	1.86101	1.47535
1.07308	1.41712	2.06838	1.50275	2.24575	1.40937	2.17455		1.16516	1.8602	1.63028	2.12405	1.61913	1.86259	1.47382
1.0731	1.41601	2.06899	1.5023	2.24678	1.40906	2.17624		1.1651	1.86032	1.6285	2.12945	1.61636	1.86322	1.47237
1.07311	1.41585	2.07135	1.5018	2.24845	1.40701	2.17966		1.16502	1.86057	1.62693	2.13006	1.61612	1.8658	1.4723
1.07421	1.41412	2.07166	1.49884	2.25066	1.40516	2.18003		1.16485	1.86067	1.62516	2.13715	1.61586	1.8666	1.46987
1.07423	1.41269	2.07192	1.49869	2.2515	1.4021	2.18079		1.16451	1.86231	1.62304	2.13765	1.61565	1.86752	1.46918
1.07429	1.41259	2.07614	1.49267	2.25218	1.40028	2.18291		1.16433	1.86529	1.62259	2.1438	1.61394	1.86787	1.46722
1.07436	1.41233	2.07922	1.48926	2.25367	1.39991	2.18413		1.16426	1.86587	1.62143	2.15261	1.61233	1.86961	1.46665
1.0744	1.41076	2.08232	1.48836	2.25705	1.39514	2.18518		1.16384	1.86622	1.62079	2.15508	1.61139	1.87031	1.46368
1.07451	1.40999	2.08306	1.47291	2.25791	1.39268	2.18602		1.16372	1.86661	1.61873	2.15746	1.61109	1.87368	1.46206
1.07463	1.40994	2.08333	1.46067	2.25926	1.39063	2.18898		1.16357	1.8673	1.6183	2.16328	1.60902	1.87409	1.46115
1.07477	1.40987	2.08496	1.45317	2.26072	1.38799	2.1891		1.16328	1.86856	1.61637	2.1653	1.6084	1.87495	1.45882
1.07503	1.40979	2.0873	1.43907	2.26084	1.38742	2.19128		1.16323	1.86876	1.61491	2.16746	1.60665	1.87504	1.45851
1.07523	1.40952	2.08744	1.43071	2.26248	1.38287	2.1945		1.1632	1.8704	1.61189	2.17057	1.60573	1.87726	1.45827
1.07549	1.40925	2.08981	1.39689	2.26786	1.38121	2.19453		1.16303	1.87079	1.60961	2.17974	1.60474	1.87952	1.45724
1.07551	1.4092	2.09714	1.38969	2.2682	1.37832	2.20023		1.16297	1.87124	1.60916	2.18627	1.60457	1.88397	1.45323
1.07551	1.4069	2.09911	1.38168	2.27063	1.37265	2.20796		1.16294	1.87276	1.60687	2.19257	1.60128	1.88486	1.45177
1.07553	1.40505	2.09917	1.37266	2.27156	1.37104	2.21119		1.16288	1.87428	1.60586	2.19637	1.60077	1.88613	1.45112
1.07631	1.40447	2.09992	1.37095	2.27335	1.36931	2.2136		1.16284	1.87545	1.60524	2.21109	1.60035	1.88774	1.4495
1.07642	1.40318	2.10123	1.34306	2.27406	1.36859	2.21794		1.16284	1.87591	1.605	2.21673	1.59957	1.88798	1.44924
1.07661	1.40276	2.10952	1.32119	2.27539	1.36473	2.21897		1.1628	1.87697	1.60118	2.21978	1.59849	1.89005	1.44914
1.0767	1.40268	2.10955	1.18173	2.27687	1.36398	2.21981		1.16262	1.87745	1.60058	2.23273	1.59821	1.8901	1.44908
1.07673	1.4025	2.11203	1.17507	2.27809	1.35635	2.22191		1.16215	1.87808	1.59975	2.24973	1.59728	1.89136	1.44712
1.07681	1.40235	2.11225	1.13662	2.27976	1.35478	2.22264		1.16177	1.87917	1.5989	2.25411	1.59727	1.89164	1.44692
1.07701	1.40104	2.11276	1.131	2.2801	1.35431	2.22771		1.16172	1.87976	1.59664	2.25513	1.59724	1.89185	1.44681
1.07709	1.40103	2.11728	1.11772	2.28072	1.35375	2.22898		1.16172	1.88053	1.59323	2.2599	1.59661	1.8924	1.4464
1.07765	1.401	2.12034	1.08616	2.28138	1.34934	2.2323		1.16171	1.88163	1.59191	2.27214	1.59623	1.89453	1.44633
1.07798	1.40059	2.12084	1.07864	2.28195	1.34766	2.23471		1.16163	1.88166	1.59106	2.3288	1.59593	1.90778	1.44498
1.07829	1.40017	2.12342	1.06792	2.2834	1.34529	2.23765		1.16148	1.88425	1.58866	2.34528	1.59477	1.90832	1.44148
1.07859	1.39964	2.12638	1.05987	2.28825	1.34124	2.24201		1.1614	1.88458	1.58757	2.39915	1.59445	1.90999	1.44017
1.07877	1.39933	2.12685	1.04683	2.29658	1.33962	2.24242		1.16136	1.88483	1.58647	2.40107	1.59418	1.91161	1.43982
1.07881	1.39826	2.12914	1.04579	2.29942	1.33857	2.24262		1.16132	1.8851	1.58305	2.40491	1.59384	1.91305	1.43982
1.079	1.39807	2.12982	1.04013	2.30044	1.33218	2.24514		1.1613	1.88539	1.58035	2.46754	1.59194	1.91609	1.43956
1.07923	1.39788	2.13101		2.30482	1.32924	2.24607		1.16125	1.88624	1.58033		1.58842	1.91941	1.43921
1.07941	1.3977	2.13174		2.30691	1.31368	2.24846		1.16109	1.88668	1.57335		1.58731	1.91942	1.43757
1.07989	1.39736	2.13189		2.30753	1.30838	2.25217		1.16098	1.88691	1.57283		1.58539	1.91983	1.4363
1.08045	1.39665	2.13191		2.30783	1.30779	2.25258		1.16087	1.88742	1.5716		1.58456	1.92496	1.43482
1.08047	1.39616	2.13218		2.31339	1.29867	2.26535		1.16036	1.88755	1.57065		1.58359	1.92727	1.43321
1.08067	1.39616	2.13399		2.31571	1.29794	2.26851		1.16025	1.88808	1.56941		1.57578	1.93264	1.43241
1.08069	1.39336	2.13495		2.31877	1.29603	2.26934		1.16014	1.88859	1.56757		1.57553	1.93286	1.43227
1.08075	1.39331	2.14249		2.32015	1.29227	2.26985		1.16002	1.88876	1.56616		1.57316	1.93454	1.43206
1.08102	1.39099	2.14274		2.32568	1.29146	2.26989		1.15997	1.8888	1.56496		1.57285	1.93529	1.43115
1.08144	1.39068	2.14307		2.32853	1.28164	2.27394		1.1599	1.89209	1.56444		1.57266	1.94447	1.42996
1.08179	1.39059	2.14686		2.33018	1.28098	2.27541		1.15961	1.89238	1.56388		1.57056	1.94613	1.4292
1.08241	1.3905	2.14747		2.33603	1.27881	2.27623		1.15958	1.89291	1.56217		1.56838	1.9515	1.42822
1.08248	1.39018	2.15024		2.33659	1.2747	2.27846		1.1594	1.8954	1.55878		1.56585	1.95207	1.4278
1.08275	1.38971	2.15364		2.33663	1.26535	2.28249		1.15875	1.89631	1.55717		1.56463	1.95484	1.4273
1.08314	1.38959	2.1542		2.34029	1.25088	2.28406		1.15867	1.89669	1.55661		1.56291	1.95623	1.42606
1.08341	1.38757	2.15454		2.34298	1.24889	2.28697		1.15865	1.89717	1.55493		1.56181	1.96349	1.42601
1.08343	1.38708	2.15521		2.34337	1.22838	2.28916		1.15841	1.89721	1.55349		1.56006	1.96463	1.42583
1.08389	1.38651	2.15549		2.34411	1.22483	2.29351		1.15815	1.8978	1.55102		1.55991	1.96563	1.42142
1.08399	1.38641	2.15945		2.3445	1.22363	2.29818		1.15807	1.89809	1.55002		1.5599	1.98209	1.42098
1.08415	1.38541	2.1634		2.34533	1.21881	2.30198		1.15806	1.89833	1.54955		1.55876	1.99006	1.41975
1.08445	1.38528	2.16526		2.34648	1.1953	2.31195		1.15799	1.90011	1.5489		1.55451	1.99205	1.41792
1.08446	1.38261	2.16629		2.358	1.17782	2.31397		1.15792	1.9007	1.54845		1.55381	2.00873	1.4172
1.08458	1.38237	2.16774		2.36321	1.17279	2.31566		1.15766	1.90091	1.54418		1.5528	2.01376	1.4172
1.08475	1.38234	2.17321		2.366	1.16162	2.32183		1.15752	1.90355	1.54198		1.55217	2.02408	1.41585
1.08511	1.38152	2.17531		2.36974	1.15096	2.33144		1.15748	1.90384	1.54141		1.55183	2.03986	1.41581
1.08519	1.38043	2.17769		2.37422	1.14634	2.33655		1.15723	1.90387	1.53946		1.55163	2.05095	1.41461
1.08521	1.38013	2.18259		2.37486	1.14578	2.3386		1.15715	1.90407	1.53928		1.54813	2.05458	1.41328
1.08563	1.3783	2.1905		2.37524	1.12756	2.34142		1.15712	1.90428	1.53752		1.54498	2.06332	1.41172
1.08573	1.37745	2.1908		2.37525	1.11676	2.34281		1.15705	1.9054	1.5371		1.54394	2.07696	1.41006
1.0858	1.37694	2.19323		2.37646	1.10179	2.34609		1.15703	1.9062	1.53641		1.5432	2.09948	1.40958
1.0859	1.37526	2.19813		2.38095	1.08681	2.34742		1.15697	1.90667	1.53231		1.54274	2.10124	1.40939
1.08599	1.3749	2.19859		2.38743	1.07227	2.34943		1.15689	1.9075	1.52908		1.54143	2.10827	1.40739
1.08601	1.37333	2.2017		2.38806	1.06641	2.35261		1.15681	1.9079	1.52664		1.53758	2.10952	1.40714
1.08606	1.37271	2.2032		2.38938	1.06314	2.35469		1.15677	1.90827	1.5253		1.53273	2.16686	1.40566
1.08667	1.3724	2.20715		2.3894	1.03792	2.35634		1.15642	1.91057	1.52465		1.53037	2.20994	1.4037
1.08677	1.37195	2.20871		2.39827	1.02501	2.35696		1.15638	1.9126	1.52355		1.52833	2.25703	1.40277
1.08679	1.37174	2.20913		2.40011	0.97717	2.35901		1.15633	1.91326	1.52109		1.52624	2.34269	1.40253
1.08687	1.37096	2.2128		2.40112		2.36332		1.15632	1.91448	1.52046		1.5258		1.40195
1.0871	1.37079	2.21566		2.41262		2.3661		1.15629	1.91456	1.51958		1.52144		1.40162
1.08712	1.37051	2.21691		2.41871		2.37411		1.15618	1.91545	1.51861		1.52119		1.39962
1.08733	1.36936	2.22084		2.42004		2.37425		1.15592	1.91595	1.51323		1.52093		1.39958
1.08742	1.36932	2.22146		2.42886		2.37476		1.15579	1.91687	1.51224		1.51905		1.39521
1.08743	1.36925	2.22298		2.42928		2.38939		1.15548	1.91769	1.51009		1.51292		1.39424
1.08769	1.36901	2.22353		2.42931		2.3964		1.15511	1.91844	1.50989		1.51222		1.39251
1.0878	1.36832	2.23054		2.43441		2.40144		1.15504	1.91947	1.50977		1.51208		1.3917
1.08793	1.3668	2.23105		2.43497		2.40542		1.15479	1.92061	1.50703		1.51066		1.39038
1.08803	1.36676	2.23145		2.43894		2.412		1.15464	1.92062	1.50683		1.50719		1.39023
1.08805	1.36653	2.2419		2.44066		2.41572		1.15456	1.92122	1.50616		1.50707		1.38395
1.08826	1.36628	2.24439		2.44547		2.41913		1.15434	1.92193	1.50551		1.50649		1.38395
1.08832	1.3656	2.24472		2.44691		2.42497		1.1543	1.92295	1.50197		1.50472		1.38102
1.08856	1.36414	2.24575		2.4486		2.42938		1.15421	1.92316	1.49324		1.50374		1.38021
1.0886	1.36366	2.24713		2.45186		2.43523		1.15411	1.92404	1.49173		1.50326		1.37902
1.089	1.36251	2.25206		2.46145		2.44989		1.15368	1.92433	1.48824		1.50193		1.37836
1.09087	1.36177	2.25529		2.46238		2.46027		1.15367	1.92578	1.48305		1.50127		1.3783
1.09106	1.3616	2.25566		2.46487		2.46704		1.15361	1.92609	1.47841		1.49852		1.37802
1.09115	1.36105	2.25603		2.46739		2.4742		1.15349	1.92655	1.4693		1.49612		1.37596
1.09131	1.36094	2.2561		2.46807		2.47588		1.15333	1.92699	1.46151		1.49518		1.37368
1.09159	1.36046	2.25723		2.46989		2.48212		1.15323	1.92766	1.46111		1.4948		1.37267
1.0917	1.35968	2.26089		2.46997		2.48459		1.15323	1.92851	1.45522		1.4945		1.37175
1.09172	1.35875	2.2629		2.47069		2.48656		1.15316	1.92883	1.45449		1.49321		1.37156
1.09192	1.35824	2.27262		2.4711		2.50083		1.15306	1.92887	1.45178		1.49214		1.37021
1.09202	1.358	2.27426		2.47149		2.50496		1.15265	1.92899	1.45174		1.49012		1.36931
1.09225	1.35733	2.27474		2.47516		2.50799		1.15242	1.92951	1.44983		1.48685		1.36809
1.09233	1.35709	2.27527		2.47538		2.52145		1.15235	1.92983	1.44847		1.48357		1.36648
1.09254	1.35646	2.28634		2.47648		2.52309		1.15193	1.93055	1.44824		1.47861		1.36072
1.09296	1.3563	2.29329		2.48128		2.52578		1.15186	1.93096	1.44763		1.47817		1.35485
1.0932	1.35585	2.30206		2.48934		2.52603		1.15185	1.93128	1.4438		1.47742		1.35194
1.09351	1.3546	2.30393		2.48987		2.53479		1.15185	1.93135	1.43931		1.47469		1.35086
1.09386	1.35293	2.304		2.50247		2.53536		1.15155	1.93214	1.43859		1.47208		1.34999
1.09402	1.35224	2.30471		2.50557		2.53622		1.15138	1.9324	1.43858		1.46935		1.34908
1.09413	1.35155	2.30561		2.51386		2.53714		1.15132	1.93242	1.4382		1.4693		1.34538
1.09418	1.34915	2.30647		2.52282		2.541		1.15125	1.93268	1.43379		1.4653		1.34385
1.09458	1.34904	2.30833		2.52343		2.54143		1.15119	1.93419	1.43197		1.46516		1.3433
1.09477	1.34857	2.3109		2.53085		2.5634		1.15104	1.93518	1.43133		1.46134		1.34239
1.09513	1.34828	2.31227		2.53113		2.56535		1.15092	1.93542	1.43128		1.45964		1.34216
1.09515	1.34639	2.31267		2.53177		2.5697		1.15089	1.93562	1.43087		1.45949		1.33938
1.09525	1.34612	2.31496		2.53231		2.57312		1.15073	1.93707	1.42902		1.4592		1.33921
1.09539	1.34603	2.31645		2.53867		2.58582		1.15053	1.9371	1.41973		1.44958		1.33007
1.09551	1.34402	2.32072		2.54305		2.58604		1.15041	1.93772	1.41049		1.44655		1.32616
1.09569	1.34379	2.3241		2.55324		2.58689		1.15034	1.93773	1.40929		1.44592		1.32132
1.09592	1.34326	2.32987		2.55352		2.60072		1.15024	1.93791	1.40515		1.44242		1.31487
1.09593	1.34281	2.33174		2.56731		2.614		1.15023	1.93845	1.40314		1.44164		1.31218
1.09599	1.3428	2.34217		2.57385		2.61531		1.15005	1.93848	1.40065		1.43557		1.29954
1.09683	1.34221	2.35236		2.57405		2.63055		1.15001	1.94103	1.39143		1.43506		1.28897
1.09705	1.34189	2.35666		2.57825		2.65215		1.15001	1.94149	1.39048		1.43219		1.27865
1.09728	1.34177	2.36539		2.58242		2.6646		1.14993	1.94211	1.38559		1.42405		1.27827
1.09741	1.34149	2.36849		2.58469		2.67267		1.1498	1.94258	1.38387		1.42298		1.27263
1.09764	1.34129	2.36914		2.58483		2.69978		1.14956	1.94407	1.37583		1.42137		1.26986
1.09766	1.34075	2.36975		2.5852		2.70143		1.14948	1.94509	1.37282		1.41784		1.25686
1.0978	1.34052	2.37798		2.58957		2.70242		1.14947	1.9455	1.36658		1.41443		1.25314
1.09827	1.34027	2.38013		2.59206		2.70539		1.14923	1.94983	1.36501		1.41255		1.25175
1.0983	1.33881	2.38337		2.5927		2.71069		1.14906	1.95083	1.36467		1.41004		1.23462
1.09853	1.33832	2.38971		2.59927		2.71582		1.14892	1.95094	1.34259		1.40546		1.23421
1.09855	1.3383	2.38978		2.59942		2.71664		1.14823	1.9511	1.33769		1.40276		1.2336
1.09863	1.33815	2.39481		2.61682		2.72302		1.14813	1.95241	1.32744		1.39682		1.2298
1.0987	1.33804	2.39529		2.61871		2.72517		1.14759	1.95325	1.32584		1.38967		1.22948
1.09898	1.33595	2.40586		2.63054		2.73638		1.14747	1.95333	1.32439		1.3881		1.22681
1.09907	1.33552	2.41777		2.63233		2.76531		1.14732	1.95466	1.31943		1.38256		1.204
1.09929	1.33525	2.42597		2.6328		2.79306		1.14728	1.95533	1.30771		1.38183		1.20225
1.09933	1.33494	2.42991		2.63612		2.83535		1.14721	1.95542	1.30667		1.37753		1.19401
1.09937	1.33451	2.43556		2.65072		2.84528		1.1472	1.9559	1.29916		1.37363		1.18457
1.09938	1.33363	2.43568		2.65154		2.84661		1.14705	1.95594	1.29509		1.36954		1.15658
1.09945	1.33248	2.44263		2.65226		2.85565		1.1469	1.95855	1.27666		1.36887		1.15298
1.09963	1.33237	2.44297		2.66018		2.85812		1.14656	1.95893	1.27571		1.35762		1.12787
1.10007	1.33145	2.44615		2.66673		2.89088		1.14655	1.95935	1.26573		1.35454		1.10365
1.10013	1.33133	2.45233		2.66793		2.90724		1.14617	1.95962	1.25702		1.34974		1.07103
1.10014	1.32798	2.45725		2.67895		2.94924		1.14594	1.96007	1.25234		1.34037		1.0605
1.10047	1.32758	2.45874		2.67965		3.18056		1.14584	1.9612	1.2509		1.3402		1.02343
1.10104	1.32743	2.4674		2.70566				1.14581	1.96249	1.21777		1.32573
1.10122	1.32705	2.46857		2.72201				1.14575	1.96318	1.21717		1.32249
1.10144	1.32665	2.48215		2.74612				1.14568	1.96318	1.20337		1.32071
1.10145	1.32587	2.4829		2.75295				1.14565	1.96804	1.19933		1.3126
1.10151	1.3251	2.48678		2.76142				1.1456	1.96818	1.19745		1.31037
1.10156	1.32462	2.504		2.76566				1.14557	1.96846	1.18776		1.30853
1.10163	1.32434	2.51409		2.78272				1.14555	1.97016	1.18524		1.30756
1.10163	1.32298	2.52247		2.7839				1.14555	1.97252	1.17039		1.29948
1.10187	1.32283	2.52952		2.78968				1.14553	1.97357	1.16612		1.2949
1.10191	1.32223	2.53732		2.81116				1.14551	1.97448	1.14967		1.28747
1.10236	1.32196	2.55948		2.81191				1.14534	1.97512	1.14399		1.28403
1.10279	1.32187	2.57641		2.83615				1.14524	1.97572	1.11631		1.26433
1.1028	1.32098	2.57658		2.84127				1.14504	1.97652	1.11476		1.263
1.1028	1.32002	2.57685		2.8497				1.14502	1.97741	1.10985		1.25147
1.10282	1.31919	2.58115		2.85914				1.145	1.97841	1.10796		1.2407
1.10309	1.31906	2.58703		2.86119				1.14462	1.98013	1.10257		1.2387
1.1031	1.31759	2.62977		2.86407				1.14453	1.98207	1.08709		1.2365
1.1032	1.31712	2.64565		2.88209				1.14425	1.98226	1.07377		1.22734
1.10335	1.31614	2.66324		2.88908				1.14414	1.98331	1.0532		1.22577
1.1034	1.31588	2.72752		2.8946				1.14403	1.98401	1.01572		1.21499
1.10348	1.31555	2.79875		2.90076				1.14398	1.98456	1.01129		1.20807
1.10362	1.31555	2.82776		2.93005				1.14386	1.98503	0.925701		1.16518
1.10363	1.31457	3.02267		2.93029				1.14369	1.98504	0.920633		1.13662
1.10403	1.31316			2.94244				1.14342	1.98553			1.13104
1.10407	1.31091			2.95638				1.14323	1.98622			1.11519
1.10409	1.31039			2.99022				1.14309	1.98696			1.04218
1.10412	1.31012			3.00292				1.14288	1.98784			1.03885
1.10424	1.30882			3.04216				1.14283	1.98852			1.01459
1.10429	1.30865			3.04291				1.14274	1.98923			0.978962
1.10445	1.30859			3.06816				1.14264	1.98931			0.975296
1.10446	1.30727			3.14684				1.14251	1.99089			0.969328
1.10455	1.30707			3.17733				1.14242	1.99114			0.853464
1.10466	1.30694							1.14216	1.99222
1.10468	1.30692							1.14215	1.99269
1.10498	1.3069							1.14212	1.99391
1.10515	1.30675							1.14211	1.9944
1.10518	1.30576							1.14197	1.99585
1.10521	1.30547							1.14192	1.99618
1.10554	1.30371							1.14183	1.99663
1.10559	1.30344							1.14146	1.99752
1.10562	1.30342							1.14139	1.99761
1.10581	1.3033							1.14133	1.99804
1.10604	1.30306							1.1413	1.99913
1.10608	1.30303							1.14115	2.00091
1.10615	1.3007							1.14109	2.00193
1.10663	1.3007							1.14105	2.00218
1.10666	1.3							1.14067	2.00267
1.10682	1.29988							1.14044	2.00415
1.10708	1.29956							1.14034	2.0063
1.10767	1.29922							1.14029	2.00741
1.10792	1.29598							1.14026	2.00801
1.108	1.29548							1.13969	2.00877
1.10834	1.29542							1.13966	2.00896
1.10896	1.29476							1.13945	2.00981
1.10924	1.29374							1.13903	2.01196
1.10952	1.293							1.13865	2.01232
1.10954	1.29152							1.13856	2.01284
1.10988	1.29052							1.13836	2.01358
1.10999	1.29026							1.13831	2.0142
1.11004	1.28984							1.13797	2.01797
1.11015	1.28938							1.13796	2.018
1.11039	1.28912							1.13776	2.01935
1.11068	1.28854							1.13739	2.01943
1.11084	1.28675							1.13699	2.02083
1.11135	1.28632							1.13695	2.02391
1.1116	1.28514							1.13694	2.02525
1.11213	1.28514							1.13693	2.02677
1.11252	1.28502							1.13688	2.0287
1.11281	1.28212							1.13664	2.02883
1.11296	1.28184							1.13661	2.02908
1.1134	1.28048							1.13634	2.03111
1.11343	1.28008							1.13617	2.03153
1.11343	1.27907							1.13598	2.03357
1.11358	1.27897							1.13596	2.03491
1.11366	1.27865							1.13581	2.03506
1.11403	1.27834							1.13556	2.03509
1.11413	1.27726							1.13542	2.03524
1.11449	1.27638							1.13542	2.03743
1.11466	1.27638							1.13503	2.03813
1.11506	1.27511							1.13485	2.03869
1.11523	1.27469							1.13466	2.03986
1.11532	1.27418							1.13428	2.03996
1.11562	1.27389							1.13421	2.04001
1.11597	1.27277							1.13394	2.04002
1.11661	1.27058							1.13384	2.04268
1.11673	1.27039							1.13357	2.04609
1.11694	1.26969							1.13352	2.04662
1.11725	1.26931							1.13319	2.0476
1.11733	1.26873							1.13312	2.04855
1.11764	1.2673							1.13309	2.04864
1.11785	1.26625							1.13277	2.04865
1.11835	1.26328							1.13276	2.04982
1.11905	1.2619							1.13276	2.05064
1.11947	1.26062							1.13272	2.05142
1.11949	1.25964							1.1326	2.0535
1.11987	1.25808							1.13252	2.0557
1.12012	1.25784							1.13238	2.05915
1.12014	1.25758							1.13236	2.06085
1.12016	1.25708							1.13208	2.06266
1.12021	1.25501							1.13191	2.06742
1.12064	1.25238							1.1319	2.0682
1.12068	1.25067							1.13164	2.06928
1.12071	1.25053							1.13158	2.06996
1.1208	1.24938							1.13147	2.07033
1.12084	1.24693							1.13125	2.07048
1.12109	1.24562							1.13124	2.07254
1.12126	1.24453							1.13108	2.07255
1.12139	1.24264							1.13088	2.07294
1.12204	1.24219							1.13038	2.07328
1.1221	1.24135							1.13024	2.0756
1.12225	1.23916							1.13022	2.07708
1.12242	1.23915							1.12984	2.0784
1.1227	1.23839							1.12983	2.07874
1.12292	1.23828							1.12981	2.07885
1.12293	1.23633							1.12973	2.08034
1.12294	1.23607							1.12964	2.0811
1.12324	1.23554							1.12954	2.08697
1.12355	1.23533							1.12914	2.08699
1.12377	1.23451							1.12891	2.08737
1.12429	1.23449							1.12887	2.088
1.12447	1.2341							1.1284	2.08865
1.12455	1.23343							1.12834	2.08994
1.12479	1.23316							1.12829	2.0908
1.12485	1.23244							1.12828	2.09091
1.12487	1.23072							1.12811	2.09309
1.12493	1.22993							1.12767	2.09408
1.12493	1.2297							1.12766	2.0948
1.12572	1.22953							1.12751	2.09665
1.1262	1.22947							1.12742	2.09673
1.1271	1.22885							1.12732	2.0968
1.1276	1.22727							1.12729	2.0969
1.1277	1.22487							1.12716	2.09751
1.12801	1.22461							1.12712	2.10087
1.12809	1.22359							1.12678	2.1065
1.12863	1.22197							1.12654	2.10698
1.12898	1.22108							1.12634	2.10726
1.12902	1.22036							1.12616	2.10739
1.13023	1.21838							1.12602	2.10865
1.13032	1.21838							1.12599	2.11096
1.13108	1.2177							1.12597	2.11237
1.13114	1.21684							1.12579	2.11276
1.13124	1.21625							1.12567	2.11299
1.13128	1.21622							1.12554	2.11826
1.13148	1.21417							1.12543	2.11931
1.13158	1.21318							1.1253	2.11957
1.13185	1.21158							1.12491	2.1201
1.13203	1.21096							1.12489	2.12345
1.13245	1.21094							1.12488	2.1257
1.13247	1.20852							1.12478	2.12616
1.1328	1.20762							1.12459	2.12625
1.13337	1.2073							1.12456	2.12753
1.13355	1.20704							1.12433	2.12977
1.13366	1.20526							1.12418	2.13083
1.13395	1.20346							1.12403	2.13095
1.13419	1.20334							1.12396	2.13681
1.13434	1.20062							1.12381	2.14282
1.13436	1.19999							1.12362	2.14317
1.13478	1.19767							1.12357	2.14358
1.13504	1.19718							1.12338	2.14429
1.13505	1.19701							1.12333	2.14864
1.13505	1.19656							1.1232	2.14999
1.13505	1.19572							1.12317	2.15224
1.13514	1.19398							1.12294	2.1589
1.13563	1.19277							1.12286	2.15972
1.13569	1.19265							1.1228	2.16044
1.13573	1.19243							1.12274	2.16077
1.1365	1.19099							1.12266	2.16317
1.13666	1.18856							1.12208	2.17026
1.13705	1.18842							1.12192	2.17208
1.13709	1.18696							1.1219	2.17435
1.13737	1.1867							1.12179	2.17563
1.13799	1.18577							1.12159	2.1772
1.13799	1.18213							1.12155	2.17816
1.13807	1.17686							1.12146	2.17885
1.13839	1.17634							1.12129	2.17963
1.1385	1.17547							1.12108	2.17979
1.13881	1.17241							1.12105	2.18106
1.13964	1.17094							1.12102	2.18378
1.13969	1.17008							1.12099	2.18389
1.13997	1.16881							1.12098	2.18647
1.14005	1.16738							1.12089	2.18975
1.14147	1.16524							1.12081	2.19069
1.14278	1.16383							1.12075	2.19157
1.14324	1.16257							1.12071	2.19204
1.14369	1.16252							1.12069	2.19525
1.14376	1.15865							1.12068	2.19667
1.14576	1.157							1.12047	2.1988
1.146	1.15402							1.12019	2.20382
1.14621	1.14964							1.12014	2.20499
1.14624	1.14963							1.12014	2.20904
1.14645	1.14835							1.12012	2.21213
1.1466	1.1419							1.11999	2.21476
1.14671	1.14172							1.11996	2.22119
1.14681	1.14049							1.11984	2.22362
1.14812	1.13601							1.11951	2.22831
1.14827	1.13464							1.11943	2.22958
1.14894	1.13301							1.11935	2.2315
1.14924	1.12797							1.11907	2.23161
1.14925	1.12776							1.11904	2.23594
1.14947	1.1269							1.11898	2.23939
1.14956	1.12426							1.11895	2.24233
1.14973	1.12137							1.1189	2.24912
1.14984	1.12083							1.1189	2.2493
1.15008	1.12019							1.11868	2.2545
1.1505	1.1198							1.11867	2.25492
1.15101	1.11778							1.11846	2.25703
1.15169	1.11488							1.11832	2.25836
1.15181	1.10366							1.1182	2.26397
1.15218	1.09428							1.11794	2.26527
1.15231	1.09416							1.11755	2.27379
1.15232	1.09166							1.11752	2.29105
1.15241	1.09141							1.11742	2.29929
1.15279	1.08174							1.11719	2.2996
1.15306	1.0789							1.11718	2.30398
1.15337	1.0737							1.1171	2.30584
1.15414	1.07344							1.11685	2.32457
1.15481	1.0629							1.11667	2.32979
1.15492	1.06032							1.11661	2.33717
1.1554	1.05322							1.11653	2.3462
1.1556	1.04629							1.11651	2.35704
1.15575	1.04011							1.11626	2.36051
1.15591	1.02496							1.11591	2.36719
1.15594	1.01587							1.11591	2.39707
1.15638	1.01306							1.11564	2.42416
1.15647	1.01099							1.1156	2.42849
1.15655	0.990175							1.11554	2.43429
1.15658	0.978873							1.11549	2.4372
1.15708	0.954816							1.11544	2.50585
1.15717								1.11533
1.15719								1.11527
1.15729								1.11494
1.15772								1.11474
1.15796								1.11465
1.15834								1.11462
1.15849								1.11457
1.15917								1.11431
1.16008								1.11407
1.16056								1.11404
1.1608								1.11399
1.16205								1.11382
1.16251								1.1134
1.16264								1.11302
1.16316								1.11283
1.16318								1.11267
1.16388								1.11265
1.16449								1.11254
1.16463								1.11224
1.16468								1.11215
1.16491								1.1119
1.165								1.11187
1.16508								1.1116
1.16557								1.11145
1.16596								1.11099
1.16641								1.11041
1.16662								1.11029
1.16666								1.11017
1.1667								1.10988
1.16707								1.10978
1.16784								1.10978
1.16797								1.10958
1.16804								1.10943
1.16945								1.10939
1.16988								1.10922
1.17076								1.10912
1.17142								1.10869
1.17175								1.10857
1.17211								1.10802
1.1722								1.10802
1.17231								1.10788
1.17249								1.1077
1.17281								1.10746
1.17285								1.10684
1.17316								1.10666
1.17318								1.10648
1.17336								1.10647
1.1735								1.10644
1.17374								1.10631
1.17377								1.10626
1.17412								1.1062
1.17431								1.10606
1.17431								1.10591
1.17469								1.10588
1.17509								1.10568
1.17533								1.10539
1.17544								1.10538
1.17547								1.10536
1.17589								1.10485
1.17595								1.10485
1.17671								1.10483
1.17699								1.10481
1.17723								1.1048
1.1777								1.1048
1.17838								1.10456
1.17877								1.10444
1.17905								1.1042
1.18074								1.10417
1.18094								1.10417
1.18127								1.10382
1.18148								1.1038
1.18153								1.10373
1.18168								1.10367
1.18168								1.10367
1.18257								1.10361
1.18283								1.10336
1.18381								1.10289
1.18389								1.10286
1.18492								1.1027
1.18508								1.1027
1.18588								1.10258
1.18673								1.10252
1.18683								1.1025
1.18686								1.10248
1.18736								1.10228
1.18753								1.10206
1.18834								1.10195
1.1907								1.10182
1.19079								1.10176
1.19106								1.10174
1.19123								1.10135
1.19184								1.10121
1.1919								1.10116
1.19242								1.10092
1.19332								1.10073
1.19467								1.1006
1.19471								1.09982
1.19486								1.09977
1.19568								1.09969
1.19646								1.09968
1.19675								1.09959
1.19682								1.09934
1.19735								1.09932
1.19772								1.09929
1.19812								1.09927
1.19838								1.09903
1.19854								1.09896
1.19857								1.09896
1.20054								1.0988
1.2006								1.09877
1.20101								1.09869
1.20134								1.09838
1.20198								1.09814
1.20233								1.09807
1.20326								1.09771
1.20328								1.09735
1.20362								1.09711
1.20391								1.09695
1.20564								1.09661
1.20646								1.09624
1.20707								1.09622
1.20711								1.09622
1.20714								1.09607
1.20728								1.09596
1.20747								1.09574
1.2077								1.09574
1.20803								1.09542
1.20824								1.09541
1.20831								1.09537
1.20893								1.09521
1.20946								1.09498
1.20952								1.09482
1.20984								1.09479
1.20986								1.09476
1.21046								1.09467
1.21048								1.09465
1.21218								1.0943
1.21378								1.09424
1.21386								1.09415
1.21397								1.09407
1.21415								1.09378
1.21447								1.09377
1.21462								1.09365
1.21464								1.09362
1.21598								1.09356
1.21626								1.09304
1.21635								1.09294
1.21794								1.09282
1.21827								1.09278
1.21873								1.09191
1.2198								1.09149
1.22001								1.09114
1.22008								1.09068
1.22013								1.09048
1.22026								1.0902
1.22061								1.08968
1.22196								1.08953
1.22212								1.08873
1.22275								1.08851
1.22378								1.08847
1.22391								1.08846
1.22494								1.08839
1.22555								1.08836
1.22571								1.08809
1.22589								1.08754
1.22616								1.08747
1.22651								1.08741
1.22747								1.08725
1.22767								1.08701
1.22808								1.08678
1.22811								1.08675
1.22848								1.08612
1.2285								1.08556
1.22935								1.0855
1.22941								1.08538
1.2295								1.08527
1.23025								1.08527
1.23087								1.08496
1.23148								1.08482
1.23257								1.08435
1.23258								1.08433
1.23298								1.08423
1.23473								1.08351
1.235								1.08335
1.23508								1.08309
1.23551								1.08289
1.23565								1.08279
1.23655								1.08147
1.23671								1.08141
1.2368								1.08128
1.23774								1.08054
1.23919								1.08038
1.23929								1.08002
1.23954								1.07935
1.23957								1.07883
1.23962								1.07868
1.23996								1.07864
1.24054								1.07821
1.24068								1.0781
1.24198								1.07798
1.24198								1.07789
1.24202								1.07783
1.24267								1.07763
1.24295								1.07711
1.24303								1.07638
1.24402								1.07611
1.24447								1.07592
1.24487								1.07585
1.24487								1.0758
1.24569								1.0752
1.24643								1.07456
1.24722								1.07441
1.24774								1.0734
1.2482								1.07321
1.24883								1.07308
1.24969								1.07305
1.25086								1.07279
1.25321								1.07261
1.25364								1.07243
1.25493								1.07243
1.25557								1.07232
1.25598								1.07201
1.25623								1.07132
1.25682								1.07132
1.25884								1.071
1.25933								1.07064
1.25982								1.07063
1.2611								1.07037
1.26174								1.06993
1.26235								1.06985
1.26242								1.06934
1.26274								1.06919
1.26344								1.06897
1.26401								1.06895
1.26645								1.06889
1.26709								1.06824
1.26849								1.06819
1.26917								1.06762
1.2696								1.06744
1.26977								1.06729
1.27025								1.06644
1.2709								1.0661
1.27104								1.06606
1.2717								1.06588
1.27194								1.06504
1.27245								1.06473
1.27294								1.06446
1.27351								1.06404
1.27355								1.06296
1.27552								1.06242
1.27556								1.06199
1.27588								1.06197
1.27623								1.06191
1.2764								1.0619
1.27742								1.06163
1.27838								1.06156
1.27969								1.06062
1.28129								1.0605
1.28133								1.05968
1.28155								1.05961
1.28253								1.05959
1.28624								1.05954
1.28643								1.05948
1.28816								1.0593
1.28908								1.05887
1.29079								1.05871
1.29239								1.05865
1.29253								1.05865
1.29493								1.05792
1.29613								1.05788
1.301								1.05731
1.30227								1.0571
1.30328								1.05692
1.30448								1.05676
1.30474								1.05629
1.30507								1.05574
1.3062								1.05538
1.30836								1.05481
1.31004								1.0543
1.31198								1.05403
1.31204								1.05362
1.31207								1.05324
1.31942								1.05312
1.31975								1.0531
1.31993								1.05302
1.32064								1.05296
1.32306								1.05289
1.32373								1.05271
1.32382								1.0527
1.32452								1.05245
1.32464								1.05222
1.32518								1.05216
1.32573								1.05207
1.32582								1.05154
1.32655								1.05151
1.32744								1.0514
1.3277								1.05078
1.32976								1.05067
1.3323								1.05047
1.33322								1.05019
1.3336								1.0498
1.33445								1.04953
1.33523								1.04927
1.33564								1.04925
1.33931								1.04891
1.34013								1.04867
1.34089								1.04816
1.34118								1.04786
1.34427								1.04778
1.34482								1.04773
1.34512								1.04766
1.34561								1.04753
1.34573								1.0474
1.34637								1.04666
1.34652								1.04663
1.34744								1.04635
1.34765								1.04613
1.34918								1.04612
1.35193								1.04607
1.35371								1.04594
1.35551								1.04563
1.3563								1.04561
1.36026								1.04488
1.36039								1.04477
1.36625								1.04461
1.36707								1.04456
1.37073								1.04389
1.37169								1.04365
1.37241								1.0436
1.37518								1.04323
1.37751								1.0431
1.37924								1.04284
1.37934								1.04266
1.37992								1.04218
1.38103								1.04209
1.38104								1.04206
1.38184								1.04166
1.38187								1.0416
1.38367								1.04109
1.38406								1.04055
1.38505								1.04049
1.38928								1.03938
1.39016								1.03871
1.39055								1.03814
1.39117								1.03647
1.39242								1.03639
1.39319								1.03634
1.39962								1.03572
1.40705								1.03569
1.41311								1.0355
1.41387								1.03511
1.42001								1.03508
1.42061								1.03465
1.42279								1.03423
1.42439								1.03405
1.42548								1.03372
1.42583								1.03366
1.42608								1.03345
1.42625								1.03151
1.42967								1.03129
1.43361								1.03112
1.43373								1.03106
1.43796								1.03093
1.43871								1.03038
1.4441								1.03033
1.44708								1.0302
1.44731								1.0301
1.45082								1.03002
1.45788								1.02913
1.46033								1.02883
1.46741								1.02869
1.47129								1.02844
1.47227								1.02802
1.4725								1.0274
1.47261								1.02704
1.47519								1.02683
1.48077								1.02675
1.48431								1.02444
1.48723								1.02344
1.49068								1.02213
1.49394								1.01788
1.4984								1.01745
1.49888								1.01546
1.50193								1.01537
1.50707								1.01473
1.50936								1.01358
1.50976								1.01344
1.51174								1.01273
1.51992								1.01228
1.52673								1.01169
1.5278								1.01074
1.52882								1.01031
1.53334								1.01015
1.53395								1.00999
1.5359								1.00674
1.53593								1.00503
1.53918								1.00436
1.54719								1.00334
1.54722								1.00157
1.55035								1.00153
1.55094								1.0013
1.55475								0.999965
1.56284								0.999933
1.56476								0.996145
1.57732								0.994265
1.58224								0.992423
1.58356								0.990548
1.59053								0.984578
1.59624								0.981965
1.60032								0.981156
1.60986								0.981067
1.61065								0.979656
1.68245								0.973757
1.69934								0.968002
1.71868								0.96478
1.72838								0.934597
1.74879								0.932213
1.76186								0.926523
1.77236								0.926516
1.77434								0.926102
1.81145								0.886993
1.81495								0.872896
1.9122								0.871375
2.14541								0.68065

## Sheet: Msn2-Spf1
Msn2-mCherry_nuclei_VS_cytoplasm_median T0	Msn2-mCherry_nuclei_VS_cytoplasm_median T5	Msn2-mCherry_nuclei_VS_cytoplasm_median T10	Msn2-mCherry_nuclei_VS_cytoplasm_median T15	Msn2-mCherry_nuclei_VS_cytoplasm_median T20	Msn2-mCherry_nuclei_VS_cytoplasm_median T25	Msn2-mCherry_nuclei_VS_cytoplasm_median T30		Sfp1-GFP_nuclei_VS_cytoplasm_median T0	Sfp1-GFP_nuclei_VS_cytoplasm_median T5	Sfp1-GFP_nuclei_VS_cytoplasm_median T10	Sfp1-GFP_nuclei_VS_cytoplasm_median T15	Sfp1-GFP_nuclei_VS_cytoplasm_median T20	Sfp1-GFP_nuclei_VS_cytoplasm_median 25	Sfp1-GFP_nuclei_VS_cytoplasm_median T30
2.1631	0.919123	3.33553	0.976491	4.01681	0.968371	3.54556		0.938148	1.99973	1.03416	1.64727	0.979105	1.65597	0.959303
2.14591	0.9612	3.29019	0.977883	3.55586	1.04367	3.39925		1.02285	1.97573	1.05047	1.64363	0.985273	1.57189	0.99192
1.90393	0.985818	3.24146	0.985065	3.55183	1.05455	3.39326		1.04058	1.94743	1.05502	1.59892	1.01132	1.50578	0.999579
1.75455	0.997772	3.10883	1.004	3.36595	1.08581	3.21014		1.04814	1.92463	1.05661	1.57932	1.02165	1.50298	1.00057
1.7298	0.999148	3.05452	1.07952	3.34593	1.1179	3.19373		1.05931	1.9223	1.06616	1.56381	1.02205	1.50215	1.0014
1.70735	0.999682	3.00419	1.09609	3.30349	1.13129	3.18983		1.06925	1.88951	1.09114	1.53577	1.0271	1.49428	1.00267
1.69548	1.0397	2.99827	1.10308	3.27422	1.18325	3.18127		1.0849	1.88769	1.09397	1.53398	1.03964	1.47801	1.00367
1.68177	1.05247	2.99475	1.1153	3.25923	1.18382	3.18084		1.09879	1.87941	1.09657	1.52863	1.04308	1.4568	1.01283
1.6546	1.05887	2.95262	1.15195	3.22576	1.19052	3.16447		1.10228	1.84764	1.10232	1.52701	1.0463	1.44551	1.01516
1.63344	1.06028	2.95169	1.1859	3.21332	1.20001	3.12502		1.10426	1.84373	1.10939	1.52551	1.05761	1.44488	1.02121
1.61557	1.06427	2.93441	1.20529	3.20694	1.20619	3.12402		1.10553	1.84071	1.1133	1.50896	1.06327	1.44472	1.02193
1.61525	1.06587	2.93425	1.21368	3.20545	1.22548	3.0756		1.11259	1.83925	1.11781	1.49986	1.06392	1.44108	1.02196
1.60386	1.0667	2.92241	1.2195	3.1696	1.22936	3.0703		1.11566	1.83859	1.12878	1.49577	1.07497	1.43056	1.02206
1.59472	1.07508	2.92107	1.25666	3.11497	1.23962	3.05333		1.11631	1.83714	1.12901	1.49562	1.07596	1.42659	1.02243
1.56757	1.07661	2.88699	1.27174	3.08423	1.24771	3.05266		1.11714	1.83077	1.13246	1.49395	1.07695	1.42606	1.0226
1.56099	1.07901	2.87943	1.27671	3.07925	1.24987	3.05135		1.12086	1.82756	1.13925	1.49231	1.08217	1.4212	1.02461
1.54969	1.0795	2.84246	1.28613	3.06676	1.25261	3.02719		1.12819	1.81679	1.14194	1.48782	1.08275	1.41967	1.02498
1.53056	1.07971	2.82264	1.29192	3.06585	1.25523	3.01098		1.13615	1.81451	1.14206	1.48742	1.08749	1.4189	1.02559
1.51521	1.07987	2.80667	1.29975	3.06199	1.26635	3.00349		1.1426	1.8115	1.14433	1.48531	1.09042	1.41765	1.02679
1.51445	1.07993	2.79994	1.31327	3.05735	1.27392	2.99779		1.14404	1.8105	1.14681	1.47771	1.09553	1.41663	1.03041
1.50815	1.0816	2.78386	1.3153	3.03717	1.2752	2.9838		1.14438	1.80923	1.14687	1.47476	1.09806	1.41601	1.03164
1.49705	1.08281	2.75144	1.31758	2.99998	1.30529	2.95783		1.14501	1.80084	1.14861	1.47344	1.0982	1.41329	1.04106
1.48987	1.08398	2.74747	1.3179	2.94269	1.30923	2.95402		1.14773	1.79892	1.14943	1.4722	1.09836	1.4125	1.0415
1.48702	1.08666	2.73398	1.32753	2.91365	1.31474	2.92578		1.15238	1.7974	1.14949	1.47213	1.09934	1.41214	1.04181
1.48693	1.09086	2.72464	1.3404	2.9075	1.33388	2.89631		1.15468	1.79649	1.14986	1.46566	1.10253	1.40926	1.04229
1.46742	1.09129	2.71904	1.36057	2.89103	1.33394	2.89332		1.15867	1.79281	1.15366	1.46383	1.10254	1.40858	1.04321
1.46485	1.09813	2.69504	1.38751	2.88609	1.33427	2.88336		1.1606	1.79034	1.15515	1.46369	1.1026	1.40638	1.04421
1.46321	1.09925	2.69225	1.39127	2.85646	1.34024	2.87395		1.16321	1.78834	1.15752	1.46243	1.103	1.40591	1.04497
1.45472	1.11084	2.67858	1.40636	2.83074	1.34032	2.86915		1.16508	1.78774	1.15872	1.46231	1.10316	1.40588	1.04556
1.44813	1.11245	2.66401	1.41125	2.82959	1.3496	2.86749		1.16641	1.78609	1.16296	1.46206	1.1044	1.40364	1.04602
1.44184	1.118	2.66114	1.41294	2.82498	1.35472	2.86694		1.16965	1.78369	1.16625	1.46086	1.10921	1.40296	1.04608
1.43789	1.12072	2.65651	1.4288	2.82427	1.35511	2.86268		1.17091	1.77167	1.16684	1.45961	1.11308	1.40226	1.04646
1.43304	1.1213	2.65627	1.44091	2.82421	1.35841	2.85755		1.17219	1.77023	1.16941	1.45881	1.114	1.40088	1.04695
1.43242	1.12194	2.65521	1.45839	2.80635	1.36092	2.85387		1.17444	1.76598	1.17035	1.45826	1.11472	1.39966	1.047
1.43056	1.12482	2.6424	1.46921	2.79724	1.36118	2.85135		1.17455	1.76551	1.17072	1.45542	1.11564	1.39171	1.04865
1.42563	1.12508	2.61701	1.47441	2.77784	1.36749	2.84624		1.17502	1.76422	1.17556	1.45469	1.11702	1.38411	1.05231
1.42544	1.12566	2.61668	1.48079	2.7754	1.37272	2.83414		1.17589	1.75779	1.17796	1.45291	1.11818	1.38357	1.05296
1.42478	1.12811	2.60599	1.49429	2.76821	1.37633	2.83284		1.17748	1.75753	1.17861	1.45247	1.12007	1.38215	1.05535
1.41699	1.12923	2.59703	1.50156	2.75861	1.37723	2.83122		1.17762	1.75234	1.18012	1.44941	1.12051	1.38192	1.05603
1.41408	1.13114	2.59552	1.50646	2.75758	1.37755	2.82004		1.18008	1.7508	1.18026	1.44253	1.1214	1.38146	1.05718
1.4056	1.13557	2.59051	1.50853	2.75732	1.39972	2.81207		1.18239	1.75042	1.18077	1.44145	1.12214	1.3794	1.05797
1.40456	1.13646	2.58457	1.51415	2.74921	1.40405	2.8057		1.18592	1.74633	1.18156	1.44095	1.12377	1.37652	1.05929
1.40425	1.13708	2.58335	1.51496	2.74711	1.40931	2.80243		1.18652	1.74488	1.18357	1.43707	1.12522	1.37637	1.05958
1.40361	1.1407	2.57074	1.51741	2.74331	1.4127	2.78605		1.18655	1.74365	1.1858	1.43686	1.12715	1.37637	1.05974
1.40202	1.14096	2.56531	1.52924	2.7394	1.42005	2.78331		1.1884	1.74031	1.1869	1.43646	1.12717	1.37334	1.06025
1.39967	1.14228	2.56223	1.53926	2.73653	1.42172	2.78246		1.18962	1.74008	1.1875	1.43587	1.128	1.37111	1.0613
1.39667	1.14641	2.54938	1.55274	2.73555	1.42362	2.78099		1.19261	1.73914	1.18795	1.43584	1.12832	1.36976	1.06185
1.39549	1.14808	2.54642	1.55681	2.72853	1.42464	2.77465		1.1928	1.7385	1.18833	1.4337	1.13022	1.36947	1.06212
1.39541	1.15943	2.5372	1.56357	2.7238	1.42472	2.75703		1.19378	1.73837	1.18971	1.43364	1.13062	1.36715	1.06379
1.39533	1.16232	2.53489	1.56416	2.72154	1.43017	2.7489		1.19465	1.7338	1.19035	1.43251	1.13116	1.36474	1.06438
1.3946	1.16608	2.53389	1.5698	2.71505	1.43087	2.74845		1.197	1.73043	1.1904	1.43212	1.13171	1.36261	1.06479
1.39431	1.16661	2.53173	1.57542	2.71458	1.43394	2.74116		1.19709	1.73035	1.19063	1.42877	1.13243	1.3618	1.06506
1.38817	1.16849	2.5312	1.57629	2.70785	1.43922	2.73953		1.20123	1.73	1.1917	1.42826	1.13253	1.36006	1.06513
1.38682	1.17158	2.52816	1.57745	2.70435	1.44105	2.73919		1.2032	1.7281	1.19257	1.42698	1.13276	1.35929	1.06616
1.38617	1.18232	2.52417	1.58221	2.70058	1.44853	2.73311		1.20482	1.71842	1.19262	1.41972	1.13295	1.3574	1.06622
1.38559	1.18466	2.51639	1.58463	2.69598	1.4522	2.7211		1.20795	1.71763	1.19536	1.41883	1.13427	1.357	1.06687
1.38492	1.18668	2.51443	1.59594	2.69552	1.45387	2.7178		1.2084	1.71571	1.19553	1.41882	1.13502	1.3568	1.06738
1.38368	1.18739	2.51361	1.60135	2.68573	1.45554	2.71331		1.21044	1.71539	1.19642	1.41791	1.1355	1.35666	1.06781
1.3832	1.18747	2.51153	1.6037	2.67283	1.45603	2.71284		1.21227	1.71264	1.19769	1.41679	1.13644	1.35524	1.06806
1.38102	1.18789	2.51035	1.60571	2.67227	1.45618	2.70959		1.21452	1.71143	1.19975	1.41565	1.13812	1.35396	1.06861
1.38097	1.18823	2.51035	1.61443	2.66857	1.45674	2.7088		1.2179	1.71137	1.1998	1.41544	1.13917	1.35387	1.06891
1.37922	1.18921	2.50554	1.61844	2.66407	1.45822	2.70318		1.21865	1.71038	1.19983	1.41509	1.1392	1.35383	1.06996
1.37837	1.18936	2.50257	1.62521	2.66101	1.45897	2.70226		1.22065	1.70955	1.20009	1.41344	1.13921	1.3535	1.07063
1.37794	1.1896	2.49933	1.62739	2.65847	1.46311	2.69855		1.22096	1.7078	1.20062	1.41303	1.13926	1.35278	1.07146
1.37744	1.18962	2.49071	1.62885	2.65392	1.46551	2.69781		1.22187	1.70681	1.2022	1.41249	1.13954	1.35099	1.07217
1.37732	1.19021	2.49019	1.6292	2.65193	1.46668	2.69618		1.22269	1.70283	1.20303	1.41247	1.13995	1.35018	1.07235
1.37405	1.1912	2.48042	1.63573	2.64624	1.4676	2.69597		1.22386	1.70242	1.20324	1.41178	1.14075	1.34951	1.07273
1.37329	1.19564	2.47769	1.63766	2.61761	1.47076	2.69385		1.2242	1.69811	1.20352	1.41133	1.14201	1.34923	1.07432
1.37302	1.1979	2.47536	1.63882	2.61679	1.4741	2.68821		1.22577	1.69805	1.20353	1.4112	1.1421	1.34711	1.0747
1.37258	1.19869	2.47283	1.63995	2.61418	1.47615	2.68731		1.2269	1.6963	1.20355	1.41021	1.14449	1.34625	1.07482
1.37204	1.20021	2.47048	1.64123	2.60956	1.47741	2.68162		1.22907	1.69445	1.20382	1.4093	1.14492	1.34535	1.0767
1.37184	1.20345	2.46741	1.64523	2.60301	1.48107	2.6811		1.23111	1.69258	1.20604	1.40928	1.14541	1.34386	1.07734
1.3709	1.20364	2.46713	1.64628	2.59961	1.48119	2.67852		1.23201	1.6924	1.208	1.40875	1.14557	1.34266	1.07775
1.37048	1.20423	2.46442	1.64915	2.59849	1.48295	2.67532		1.23296	1.69049	1.20807	1.40688	1.14576	1.34224	1.07806
1.36747	1.21005	2.45402	1.65341	2.58413	1.48363	2.67324		1.23381	1.69018	1.20857	1.40514	1.14873	1.34214	1.07845
1.36283	1.21641	2.44663	1.65697	2.57351	1.48469	2.67252		1.23399	1.6885	1.20925	1.40316	1.14904	1.34195	1.08052
1.36258	1.21662	2.44565	1.65699	2.57129	1.486	2.67086		1.23532	1.68833	1.20939	1.40211	1.14979	1.34165	1.08121
1.35703	1.21673	2.44558	1.66421	2.56972	1.48869	2.66333		1.23596	1.68731	1.21219	1.40197	1.14983	1.34156	1.08188
1.35554	1.21894	2.44321	1.6649	2.56702	1.49197	2.66011		1.23622	1.68649	1.2152	1.40197	1.15036	1.34153	1.0819
1.355	1.22054	2.44155	1.66854	2.56338	1.49276	2.65631		1.2365	1.68601	1.21535	1.40192	1.15066	1.34143	1.08203
1.35447	1.22147	2.43777	1.67161	2.55553	1.49289	2.65507		1.23694	1.68498	1.21575	1.40156	1.15132	1.341	1.08302
1.35411	1.22249	2.43583	1.67437	2.55414	1.49412	2.65195		1.23719	1.68491	1.21614	1.39942	1.15154	1.33952	1.08539
1.35292	1.22596	2.43337	1.67713	2.55273	1.49603	2.65151		1.23783	1.68454	1.21677	1.39917	1.15293	1.33935	1.0855
1.34821	1.22673	2.42799	1.67915	2.54964	1.50023	2.64999		1.24037	1.68443	1.21826	1.39912	1.15302	1.33802	1.0855
1.34576	1.22674	2.41421	1.6823	2.54524	1.50474	2.64933		1.24157	1.68358	1.21991	1.39904	1.15356	1.33708	1.08596
1.34401	1.22834	2.40918	1.68554	2.54208	1.50681	2.64807		1.24171	1.68292	1.22046	1.39845	1.15369	1.33708	1.08607
1.34366	1.22956	2.40673	1.68577	2.54133	1.50792	2.64111		1.24296	1.68215	1.22063	1.39809	1.15389	1.33582	1.0863
1.34218	1.23014	2.39851	1.6864	2.54025	1.50831	2.64044		1.24311	1.67807	1.22131	1.39755	1.15398	1.33542	1.0864
1.34186	1.232	2.39407	1.68709	2.53887	1.50919	2.63892		1.24571	1.67805	1.22133	1.39682	1.15418	1.33525	1.08675
1.33758	1.23476	2.38844	1.68719	2.53458	1.51105	2.63123		1.24734	1.67738	1.22247	1.39613	1.15565	1.33517	1.08806
1.33736	1.2371	2.38659	1.68761	2.53451	1.51266	2.62445		1.24803	1.67576	1.22483	1.3946	1.15603	1.33401	1.08808
1.33133	1.24519	2.38468	1.69173	2.53045	1.51397	2.61684		1.24962	1.67489	1.22616	1.39353	1.15634	1.33355	1.08915
1.33112	1.24553	2.38224	1.69192	2.52801	1.51552	2.61452		1.24983	1.67461	1.22985	1.39322	1.1572	1.33269	1.08925
1.3284	1.24579	2.37879	1.69215	2.52798	1.51705	2.61315		1.25127	1.67235	1.23001	1.39312	1.15754	1.32963	1.0898
1.32736	1.24768	2.37724	1.69277	2.52707	1.52139	2.61058		1.25437	1.67107	1.23032	1.39222	1.15756	1.32951	1.09025
1.32643	1.25046	2.37199	1.69466	2.51469	1.52185	2.60962		1.2546	1.66398	1.23127	1.39212	1.15763	1.32793	1.09039
1.32616	1.25436	2.36947	1.69768	2.51418	1.52219	2.60811		1.25517	1.66379	1.23159	1.39149	1.15831	1.32695	1.091
1.32574	1.25495	2.36929	1.69769	2.51043	1.52311	2.60601		1.25801	1.66289	1.23448	1.39077	1.15897	1.32687	1.09219
1.3245	1.25663	2.36095	1.70579	2.5063	1.52515	2.60458		1.25839	1.66024	1.23625	1.39071	1.15905	1.32659	1.09322
1.32449	1.25773	2.35969	1.70959	2.50499	1.52696	2.60154		1.25993	1.65953	1.23929	1.39016	1.15984	1.3256	1.0933
1.32402	1.25796	2.359	1.71022	2.50423	1.53128	2.6003		1.25994	1.65535	1.23981	1.38992	1.16088	1.32557	1.09334
1.32045	1.25819	2.3588	1.71057	2.49684	1.53218	2.5941		1.25998	1.655	1.24009	1.38978	1.16215	1.32403	1.09433
1.31914	1.26026	2.34862	1.7138	2.4933	1.53248	2.58713		1.26001	1.65377	1.24012	1.38884	1.16472	1.32358	1.0952
1.31906	1.26297	2.34763	1.71388	2.49222	1.53352	2.58297		1.26066	1.65295	1.2415	1.38741	1.16472	1.32325	1.09574
1.31872	1.26492	2.34484	1.71709	2.49011	1.53565	2.57971		1.26213	1.65067	1.24284	1.38702	1.1649	1.32312	1.09583
1.31852	1.26628	2.34449	1.71938	2.48105	1.53879	2.57967		1.26249	1.65032	1.2434	1.38651	1.16523	1.32239	1.09604
1.31671	1.26663	2.34035	1.72016	2.48017	1.54071	2.57596		1.26257	1.64895	1.24424	1.38632	1.16579	1.32221	1.097
1.31502	1.26667	2.33365	1.72631	2.47736	1.54318	2.57389		1.26341	1.64876	1.24592	1.3857	1.16598	1.32156	1.09718
1.3145	1.2671	2.33289	1.72735	2.47379	1.54338	2.57359		1.26343	1.64625	1.24635	1.38558	1.16736	1.32111	1.09855
1.3139	1.26805	2.3327	1.73061	2.47245	1.54628	2.57285		1.26347	1.64411	1.24669	1.38545	1.16817	1.32008	1.09897
1.31261	1.26872	2.32868	1.73654	2.47197	1.54913	2.57138		1.2639	1.64331	1.24705	1.38481	1.16875	1.32005	1.09946
1.31105	1.2693	2.3273	1.74261	2.46944	1.55156	2.56831		1.26465	1.64155	1.2471	1.38371	1.16906	1.31967	1.1
1.30891	1.26977	2.32547	1.74264	2.46557	1.55208	2.56077		1.26483	1.64137	1.24755	1.38361	1.17004	1.31949	1.10045
1.30805	1.27346	2.32193	1.74634	2.45975	1.55229	2.55861		1.26529	1.64092	1.24777	1.3835	1.17044	1.31906	1.1024
1.30801	1.27377	2.32163	1.75585	2.45688	1.55384	2.55587		1.26584	1.6409	1.24915	1.38221	1.17054	1.31881	1.10337
1.30729	1.275	2.32156	1.75744	2.45629	1.55427	2.5542		1.26753	1.6406	1.24938	1.38197	1.17078	1.31705	1.10459
1.30578	1.27508	2.31821	1.76203	2.45333	1.55459	2.55098		1.26844	1.64013	1.25154	1.38098	1.17084	1.31579	1.10466
1.30546	1.27669	2.31372	1.76303	2.44716	1.55874	2.55056		1.26864	1.63966	1.25176	1.38072	1.17156	1.31374	1.10523
1.30486	1.27694	2.3133	1.76429	2.43714	1.559	2.54796		1.26949	1.63953	1.25191	1.37779	1.17157	1.31349	1.10532
1.30248	1.27813	2.30967	1.76915	2.43578	1.56056	2.54742		1.26967	1.63922	1.25211	1.37741	1.17161	1.31273	1.10553
1.30165	1.27942	2.30749	1.76936	2.43285	1.56112	2.54342		1.26988	1.63889	1.25212	1.37695	1.17167	1.3126	1.10556
1.29963	1.28002	2.30697	1.76999	2.43238	1.56253	2.54187		1.26992	1.63779	1.25279	1.37662	1.17194	1.31231	1.10743
1.29951	1.28009	2.30654	1.77338	2.43238	1.56349	2.53795		1.27118	1.63411	1.25286	1.37579	1.17242	1.31165	1.10758
1.29909	1.28015	2.3057	1.77338	2.43226	1.56507	2.53713		1.27141	1.63352	1.25287	1.37465	1.17254	1.3114	1.10782
1.29838	1.28331	2.3021	1.77488	2.42698	1.56582	2.53637		1.27189	1.6329	1.25324	1.37434	1.17255	1.31135	1.10806
1.29807	1.28477	2.29959	1.77561	2.42583	1.5665	2.53444		1.27198	1.62891	1.2536	1.37413	1.17276	1.31109	1.10829
1.2977	1.28522	2.29907	1.77663	2.42453	1.56786	2.51896		1.27315	1.62773	1.25429	1.37377	1.17321	1.31072	1.10842
1.29724	1.28632	2.29641	1.77747	2.42441	1.56984	2.51823		1.27347	1.62639	1.25502	1.37363	1.17363	1.31018	1.1096
1.29668	1.28704	2.29488	1.77873	2.41416	1.57146	2.5173		1.27529	1.62505	1.25502	1.37288	1.17366	1.31017	1.10992
1.295	1.28773	2.29397	1.77874	2.40737	1.57163	2.51618		1.277	1.62449	1.25505	1.37267	1.17369	1.30955	1.11112
1.29493	1.28845	2.29335	1.77889	2.40427	1.5722	2.51569		1.27752	1.62427	1.25534	1.3722	1.17384	1.30861	1.1114
1.29454	1.28903	2.28885	1.77896	2.40227	1.57296	2.51351		1.27767	1.62413	1.25571	1.37207	1.17387	1.30787	1.11189
1.29438	1.28936	2.27888	1.78248	2.39776	1.57398	2.50908		1.27786	1.62309	1.25813	1.37178	1.17477	1.30711	1.1121
1.29275	1.28945	2.2778	1.78294	2.39587	1.57474	2.50703		1.27801	1.62269	1.25821	1.37177	1.17495	1.30704	1.1121
1.29259	1.29206	2.27614	1.78319	2.38862	1.57591	2.50559		1.27861	1.62257	1.25942	1.37131	1.17517	1.30649	1.11222
1.29104	1.29336	2.27592	1.78802	2.38641	1.57593	2.50428		1.27956	1.62244	1.25996	1.37041	1.17536	1.30643	1.11296
1.29101	1.29547	2.27293	1.78959	2.38377	1.57677	2.5038		1.28028	1.62233	1.26012	1.36996	1.17594	1.30605	1.1131
1.29037	1.29548	2.2717	1.79049	2.38347	1.5784	2.50242		1.28243	1.62227	1.26026	1.3697	1.17696	1.30595	1.11337
1.29009	1.29649	2.27142	1.79174	2.38205	1.58164	2.50122		1.28386	1.61977	1.26049	1.36897	1.17697	1.30519	1.11411
1.28862	1.2969	2.26974	1.79387	2.37627	1.58418	2.50118		1.28403	1.61955	1.26058	1.36895	1.1774	1.30491	1.11422
1.28699	1.29939	2.26923	1.8002	2.37455	1.58592	2.49319		1.28438	1.61844	1.2608	1.36742	1.1776	1.30457	1.11443
1.28577	1.30028	2.26808	1.80322	2.37239	1.58623	2.49295		1.28506	1.6176	1.26145	1.36667	1.17812	1.30364	1.11444
1.28522	1.30156	2.2652	1.80546	2.37025	1.5875	2.4882		1.28589	1.61699	1.2616	1.36647	1.17831	1.30338	1.11457
1.28436	1.30166	2.26499	1.80561	2.36988	1.59022	2.48706		1.28769	1.61152	1.26232	1.36556	1.18068	1.30315	1.11466
1.28402	1.30207	2.26427	1.80612	2.36741	1.59276	2.48703		1.28955	1.61054	1.26349	1.36415	1.18218	1.30283	1.1151
1.28401	1.30266	2.26292	1.80756	2.36636	1.59367	2.48396		1.29071	1.61045	1.26459	1.36328	1.18228	1.30279	1.11589
1.28376	1.30521	2.26203	1.80883	2.3642	1.59689	2.48281		1.29174	1.60872	1.26485	1.36322	1.18245	1.30256	1.11597
1.28243	1.3056	2.26044	1.81221	2.36335	1.59762	2.48003		1.29187	1.60723	1.26571	1.36264	1.18393	1.30243	1.11625
1.28138	1.30615	2.25926	1.81849	2.36214	1.59822	2.47979		1.2945	1.60598	1.2661	1.36257	1.18449	1.30177	1.11687
1.28132	1.30688	2.25752	1.82132	2.35898	1.6015	2.47933		1.29608	1.60525	1.26657	1.3623	1.18457	1.29959	1.11688
1.28081	1.30934	2.25378	1.82485	2.3543	1.6037	2.47596		1.29608	1.60512	1.26662	1.36227	1.18461	1.29943	1.11693
1.27984	1.31127	2.25131	1.82653	2.3512	1.60435	2.47523		1.29619	1.60355	1.26818	1.36219	1.18496	1.29818	1.11696
1.27972	1.3117	2.24954	1.83159	2.34811	1.60452	2.4747		1.2964	1.60209	1.26833	1.36076	1.18547	1.29743	1.11819
1.27864	1.31178	2.24631	1.83374	2.34405	1.60999	2.47412		1.29656	1.60125	1.26836	1.36059	1.18645	1.29647	1.11826
1.27856	1.31231	2.24481	1.84291	2.34225	1.61105	2.47109		1.29688	1.60102	1.26936	1.36057	1.1874	1.29647	1.11917
1.27825	1.31245	2.24061	1.84338	2.34088	1.61129	2.46941		1.29719	1.60071	1.2694	1.3604	1.18773	1.29636	1.11992
1.27743	1.31365	2.23786	1.84758	2.33481	1.61213	2.46816		1.2973	1.60003	1.27015	1.36021	1.18794	1.29635	1.12007
1.27669	1.31773	2.23569	1.84905	2.33021	1.61264	2.46773		1.29758	1.59989	1.27061	1.35925	1.18797	1.29546	1.12027
1.27631	1.31874	2.23443	1.85931	2.32918	1.61266	2.46469		1.29855	1.59772	1.27086	1.35846	1.18841	1.29463	1.12095
1.27582	1.31964	2.23136	1.8619	2.32677	1.61323	2.46308		1.2987	1.59753	1.27135	1.35842	1.1885	1.29424	1.12119
1.27569	1.32145	2.23046	1.86363	2.32474	1.61355	2.44877		1.29922	1.5971	1.27194	1.35823	1.18875	1.2942	1.12122
1.27532	1.3224	2.22941	1.86874	2.31942	1.61492	2.44861		1.30001	1.59661	1.27234	1.35731	1.1888	1.29409	1.12122
1.27469	1.32495	2.22719	1.87035	2.31882	1.61587	2.44829		1.30214	1.59599	1.2732	1.35721	1.18937	1.29354	1.12132
1.27456	1.32501	2.22618	1.87059	2.31671	1.61958	2.44688		1.30255	1.59353	1.27348	1.35687	1.19011	1.29338	1.12218
1.27455	1.3254	2.22466	1.87097	2.31356	1.62285	2.446		1.30343	1.59298	1.27354	1.35662	1.19025	1.29332	1.12246
1.27395	1.32611	2.22445	1.87148	2.31056	1.6231	2.44574		1.30391	1.58994	1.27362	1.35595	1.1907	1.29327	1.12276
1.27362	1.32992	2.22345	1.87337	2.30895	1.62315	2.44552		1.30458	1.58946	1.27449	1.35561	1.19093	1.29315	1.1229
1.27339	1.32993	2.22228	1.87523	2.30572	1.62378	2.44227		1.30528	1.58906	1.27515	1.35492	1.19168	1.29245	1.12309
1.27274	1.3307	2.21891	1.87536	2.30566	1.63005	2.44097		1.30553	1.58897	1.27616	1.35387	1.19192	1.29215	1.12417
1.2726	1.33207	2.21851	1.87552	2.30527	1.63091	2.43838		1.30597	1.58831	1.27642	1.35386	1.19199	1.29182	1.12431
1.27165	1.33212	2.21849	1.87669	2.30096	1.6336	2.43816		1.30642	1.58789	1.27685	1.35299	1.19298	1.29178	1.12511
1.27159	1.33245	2.21741	1.88133	2.3003	1.63619	2.43581		1.30712	1.58772	1.27819	1.35264	1.193	1.29154	1.12573
1.26942	1.3337	2.21706	1.88247	2.29996	1.63967	2.43546		1.30784	1.58738	1.27829	1.35181	1.19438	1.2914	1.12655
1.26902	1.33532	2.2134	1.88277	2.29166	1.64124	2.43176		1.30792	1.5846	1.27977	1.35119	1.19524	1.29075	1.12697
1.26886	1.33639	2.21145	1.88355	2.2915	1.64129	2.43027		1.30816	1.58419	1.28019	1.35083	1.19536	1.29066	1.12749
1.26832	1.33694	2.20221	1.88396	2.2909	1.64484	2.42886		1.30934	1.58141	1.28026	1.35052	1.19588	1.2902	1.12796
1.26703	1.337	2.20133	1.88406	2.28995	1.64636	2.42515		1.30951	1.58127	1.28043	1.34988	1.19592	1.28997	1.12815
1.26649	1.33712	2.20123	1.88638	2.28906	1.64658	2.42081		1.31014	1.5798	1.28051	1.34967	1.19637	1.28921	1.12824
1.26544	1.33722	2.20103	1.88668	2.28854	1.6467	2.4192		1.31127	1.5786	1.28058	1.34948	1.19715	1.28887	1.12868
1.2641	1.33896	2.1975	1.88809	2.28174	1.64721	2.41717		1.31157	1.57839	1.28067	1.34948	1.19807	1.28854	1.12881
1.26364	1.33991	2.19622	1.88817	2.28168	1.65551	2.4162		1.31193	1.57835	1.28147	1.34922	1.19866	1.28842	1.12924
1.26345	1.34005	2.19381	1.89052	2.27881	1.65614	2.41467		1.31211	1.57834	1.28165	1.34912	1.19957	1.28839	1.12939
1.26217	1.34093	2.19175	1.89621	2.27802	1.66063	2.41445		1.31222	1.5783	1.28177	1.34784	1.20047	1.2879	1.12941
1.26101	1.34291	2.18796	1.903	2.27705	1.66283	2.4123		1.31231	1.57769	1.28194	1.34778	1.20088	1.28704	1.12942
1.25938	1.34298	2.18627	1.90413	2.27619	1.66356	2.40664		1.31275	1.57657	1.28293	1.3473	1.20132	1.28606	1.12968
1.25902	1.34328	2.18562	1.90452	2.27567	1.66379	2.40376		1.31278	1.57623	1.28298	1.34711	1.2018	1.28588	1.12978
1.25668	1.34392	2.18483	1.9046	2.27114	1.66658	2.40304		1.31305	1.57595	1.28387	1.34555	1.20194	1.28538	1.13057
1.25597	1.34617	2.17723	1.90583	2.27036	1.66789	2.40113		1.31363	1.57446	1.28487	1.34442	1.20215	1.28529	1.13088
1.25587	1.34666	2.17617	1.90635	2.26657	1.66803	2.40068		1.31486	1.57302	1.28581	1.34423	1.2031	1.28491	1.13105
1.25505	1.34705	2.17517	1.9079	2.26433	1.67031	2.39375		1.31522	1.57288	1.28629	1.34376	1.20412	1.2847	1.1315
1.25495	1.34837	2.17439	1.91036	2.26336	1.67096	2.39326		1.31636	1.57232	1.2873	1.34283	1.20536	1.28445	1.13165
1.25446	1.34869	2.17036	1.91426	2.26276	1.67463	2.39269		1.3173	1.57183	1.28744	1.34273	1.20581	1.28386	1.13182
1.25364	1.3499	2.16959	1.9179	2.25148	1.67509	2.39155		1.31753	1.56837	1.28766	1.34124	1.20587	1.28182	1.13184
1.25323	1.35024	2.16928	1.92193	2.24949	1.67538	2.38059		1.31879	1.56803	1.2883	1.34061	1.20599	1.28168	1.13228
1.25319	1.35188	2.16811	1.92855	2.24701	1.67628	2.37999		1.31902	1.56766	1.28853	1.34027	1.2062	1.28163	1.13238
1.25213	1.35314	2.16783	1.92911	2.24607	1.67952	2.37908		1.32112	1.56752	1.28869	1.34011	1.20663	1.28162	1.13247
1.25207	1.35347	2.16781	1.92923	2.243	1.68154	2.37127		1.32165	1.56632	1.28964	1.33848	1.20671	1.28143	1.13285
1.25203	1.35374	2.16619	1.92989	2.24245	1.68456	2.37117		1.32218	1.56559	1.28998	1.33792	1.20788	1.28109	1.13295
1.25189	1.35582	2.15797	1.93073	2.24196	1.68521	2.37097		1.32369	1.56508	1.29179	1.33789	1.20803	1.2805	1.13316
1.25158	1.35751	2.15545	1.93567	2.23947	1.68556	2.36627		1.32376	1.56297	1.29187	1.3373	1.20872	1.28019	1.13367
1.25125	1.35783	2.15419	1.93807	2.23522	1.68988	2.36607		1.32386	1.56256	1.29222	1.33714	1.20906	1.28013	1.13387
1.25013	1.35854	2.15246	1.93877	2.23391	1.69144	2.36045		1.32399	1.56218	1.2925	1.33675	1.20938	1.2799	1.13417
1.24989	1.35874	2.15214	1.93985	2.23124	1.69312	2.36019		1.32409	1.56202	1.29254	1.33633	1.21002	1.27983	1.13427
1.24956	1.35902	2.14776	1.94015	2.23115	1.69366	2.35933		1.32487	1.56129	1.29284	1.33594	1.21046	1.27974	1.1345
1.24946	1.35942	2.14462	1.94055	2.22511	1.69439	2.35737		1.32524	1.56125	1.29368	1.33562	1.21059	1.2782	1.1345
1.24911	1.35956	2.14387	1.94132	2.22387	1.69637	2.3561		1.3254	1.56094	1.29439	1.33555	1.21073	1.27779	1.13461
1.24756	1.35965	2.13606	1.94133	2.22282	1.69648	2.34976		1.3255	1.56053	1.29461	1.33482	1.21107	1.27777	1.13471
1.24724	1.36256	2.13126	1.94287	2.22021	1.69814	2.34822		1.32577	1.56002	1.29586	1.33463	1.21108	1.27688	1.13496
1.24628	1.36256	2.13067	1.94755	2.21771	1.69909	2.34732		1.32615	1.55992	1.29586	1.33428	1.21213	1.27679	1.13496
1.24585	1.36266	2.13024	1.94805	2.21554	1.70078	2.34688		1.32637	1.55912	1.29597	1.33416	1.21247	1.27619	1.13511
1.2454	1.36273	2.12856	1.95198	2.21533	1.70375	2.34605		1.3266	1.55897	1.29619	1.33416	1.21363	1.27616	1.13521
1.24411	1.36344	2.12692	1.95663	2.21488	1.70413	2.34126		1.32687	1.5582	1.29643	1.33392	1.21432	1.2761	1.13563
1.24382	1.36475	2.12471	1.95866	2.21336	1.70462	2.33643		1.32827	1.55811	1.29685	1.333	1.21448	1.27576	1.13576
1.24269	1.366	2.12449	1.95909	2.21041	1.70697	2.33297		1.32855	1.55746	1.29865	1.33282	1.2145	1.27517	1.13625
1.24228	1.36704	2.12038	1.96194	2.21028	1.70769	2.33067		1.32871	1.55732	1.29884	1.33185	1.21485	1.27507	1.13672
1.24218	1.3671	2.11998	1.96224	2.20803	1.70807	2.32996		1.32876	1.55696	1.29915	1.33166	1.21542	1.27467	1.13751
1.24161	1.36908	2.11986	1.96227	2.20792	1.70825	2.32861		1.32898	1.55677	1.29942	1.33117	1.21625	1.27451	1.13798
1.24113	1.37043	2.1188	1.9641	2.20761	1.70936	2.32837		1.32934	1.55647	1.3008	1.33113	1.21642	1.27406	1.13805
1.24059	1.37355	2.11687	1.96411	2.20692	1.71085	2.32616		1.32959	1.55543	1.30156	1.33076	1.21699	1.27294	1.13847
1.23927	1.37566	2.11637	1.96805	2.20321	1.71126	2.32053		1.32963	1.55435	1.30234	1.3304	1.21744	1.27268	1.13854
1.23916	1.37567	2.11494	1.96897	2.20226	1.71199	2.31938		1.3298	1.55343	1.3033	1.33027	1.21872	1.27267	1.13947
1.23853	1.3772	2.11147	1.9703	2.20162	1.71361	2.31685		1.3308	1.55222	1.30339	1.33018	1.21896	1.27267	1.13958
1.23708	1.3783	2.11061	1.97133	2.20045	1.7145	2.31444		1.33126	1.55152	1.30352	1.32977	1.21899	1.27266	1.13968
1.23707	1.37853	2.10729	1.97273	2.19946	1.71716	2.31357		1.33335	1.5507	1.30393	1.32961	1.21928	1.27187	1.14003
1.23699	1.38263	2.09939	1.97475	2.19828	1.71943	2.31155		1.33335	1.55048	1.30419	1.32921	1.21938	1.27177	1.14015
1.2365	1.38316	2.09851	1.97528	2.19711	1.72049	2.30876		1.33344	1.54965	1.30513	1.32913	1.21951	1.27176	1.14127
1.23554	1.3845	2.09687	1.97605	2.19676	1.72447	2.30705		1.33367	1.54895	1.30528	1.32904	1.21954	1.27123	1.14252
1.23488	1.38664	2.09609	1.97896	2.19443	1.72535	2.30416		1.33427	1.54827	1.30561	1.32826	1.21994	1.26977	1.14258
1.23472	1.38712	2.09472	1.9798	2.19344	1.72678	2.30242		1.33526	1.54789	1.3063	1.32696	1.22006	1.26903	1.14265
1.23348	1.38762	2.09454	1.98159	2.19291	1.72752	2.30177		1.33577	1.54484	1.30807	1.32687	1.22027	1.26856	1.14311
1.23324	1.38817	2.08683	1.98267	2.19177	1.72781	2.30161		1.33597	1.54352	1.30815	1.3266	1.22127	1.26843	1.14374
1.23304	1.38843	2.08656	1.98335	2.19067	1.72915	2.30118		1.33672	1.54271	1.30869	1.32655	1.22145	1.26843	1.14384
1.23304	1.39057	2.08554	1.98623	2.19052	1.73015	2.30072		1.33675	1.54217	1.30891	1.32626	1.22179	1.26807	1.14392
1.23226	1.39077	2.08458	1.99413	2.18633	1.73352	2.29419		1.33715	1.54128	1.30916	1.32626	1.22223	1.26771	1.14398
1.23146	1.39182	2.08454	1.99415	2.18549	1.73556	2.28981		1.33761	1.54102	1.3094	1.32591	1.22269	1.26666	1.14437
1.22971	1.39275	2.08451	1.99784	2.18405	1.73768	2.28894		1.33808	1.54088	1.31099	1.32586	1.22281	1.26593	1.14485
1.22891	1.39288	2.07974	1.99809	2.18191	1.73829	2.28733		1.33825	1.54058	1.31113	1.3258	1.22346	1.26572	1.14571
1.22887	1.39359	2.07616	1.99854	2.17996	1.73836	2.28529		1.33922	1.53984	1.31128	1.32578	1.22354	1.26566	1.14584
1.22848	1.39521	2.07511	2.00488	2.17964	1.74596	2.28364		1.33974	1.5394	1.31153	1.32577	1.22426	1.26453	1.14594
1.22827	1.39761	2.07509	2.00669	2.17629	1.74649	2.28062		1.33987	1.5393	1.31193	1.32572	1.22437	1.2644	1.14643
1.22795	1.39794	2.07502	2.00708	2.17271	1.74704	2.28034		1.34027	1.53897	1.31211	1.325	1.22458	1.26413	1.14717
1.22752	1.39806	2.07438	2.01434	2.17004	1.74719	2.28017		1.34074	1.53885	1.31278	1.3248	1.22466	1.26337	1.14719
1.22742	1.39881	2.06444	2.01503	2.1697	1.74827	2.27747		1.34105	1.5357	1.31288	1.32479	1.22466	1.26323	1.14731
1.2268	1.39898	2.06427	2.01822	2.16569	1.74949	2.27726		1.34121	1.53434	1.31288	1.32466	1.22547	1.26307	1.14764
1.22652	1.39905	2.06025	2.01865	2.16548	1.75061	2.2761		1.34127	1.53357	1.31313	1.32441	1.22555	1.26199	1.14872
1.22639	1.40131	2.05912	2.0228	2.16448	1.75414	2.27606		1.34152	1.53346	1.31356	1.32397	1.22583	1.26189	1.14874
1.22623	1.40151	2.05524	2.02283	2.16443	1.75469	2.27572		1.34158	1.53336	1.3141	1.32355	1.22584	1.26097	1.14905
1.22591	1.4023	2.05359	2.02732	2.16392	1.75669	2.27536		1.34209	1.53271	1.31426	1.32353	1.22761	1.26094	1.14913
1.22503	1.4026	2.05329	2.03034	2.16053	1.75671	2.27466		1.3435	1.53252	1.31596	1.32349	1.22791	1.26053	1.1494
1.22399	1.40373	2.05329	2.03166	2.15801	1.75841	2.26932		1.34365	1.53245	1.31726	1.32293	1.22818	1.2598	1.14961
1.22334	1.40478	2.05184	2.03463	2.15675	1.75849	2.26781		1.34391	1.53239	1.3176	1.32176	1.22924	1.25956	1.14975
1.22328	1.40506	2.05106	2.0349	2.15332	1.75972	2.26217		1.34487	1.53215	1.31763	1.32167	1.22952	1.25947	1.15105
1.22315	1.40583	2.04993	2.03569	2.15216	1.75989	2.26183		1.34594	1.53199	1.31795	1.32133	1.22987	1.25795	1.15109
1.22291	1.40612	2.03983	2.03577	2.14988	1.75992	2.26147		1.34631	1.53132	1.31805	1.32055	1.23046	1.25743	1.15122
1.22278	1.40616	2.03956	2.03819	2.14974	1.7603	2.2606		1.34697	1.53057	1.31816	1.32024	1.23066	1.25708	1.15211
1.22239	1.40722	2.03947	2.03867	2.14839	1.76077	2.25961		1.34708	1.5297	1.31847	1.3202	1.23213	1.25687	1.1526
1.22157	1.40805	2.0374	2.04056	2.14193	1.76091	2.25506		1.34794	1.52927	1.31875	1.32005	1.2323	1.25679	1.1527
1.22072	1.40844	2.03299	2.04065	2.13877	1.76104	2.25458		1.34845	1.52643	1.31981	1.31993	1.23286	1.25664	1.15288
1.22038	1.40899	2.03101	2.04086	2.13835	1.76333	2.25209		1.34852	1.52639	1.32167	1.31906	1.23394	1.25614	1.15321
1.21919	1.41061	2.02953	2.04095	2.13788	1.76458	2.25167		1.34981	1.52614	1.32201	1.31809	1.23401	1.25592	1.15325
1.21888	1.41106	2.02649	2.04981	2.13698	1.76942	2.25058		1.34991	1.52414	1.32252	1.31722	1.23427	1.25566	1.15331
1.21874	1.41108	2.02629	2.05419	2.13667	1.76976	2.24802		1.34995	1.52204	1.32295	1.31692	1.23431	1.25533	1.15351
1.21826	1.41495	2.02063	2.05429	2.13619	1.77307	2.24583		1.35044	1.52163	1.32304	1.31688	1.23479	1.25414	1.15355
1.21817	1.41532	2.01813	2.05437	2.13613	1.77321	2.24529		1.35075	1.51634	1.32309	1.31522	1.23499	1.25371	1.15402
1.21792	1.41574	2.01773	2.05479	2.13289	1.77497	2.24526		1.35085	1.51591	1.32318	1.31504	1.23517	1.25322	1.15405
1.21651	1.41747	2.01541	2.05493	2.13196	1.7755	2.24401		1.35089	1.51519	1.32344	1.31417	1.23574	1.25289	1.15492
1.21612	1.41965	2.00779	2.05742	2.12987	1.77584	2.24329		1.3518	1.51439	1.3244	1.31348	1.23633	1.25225	1.15552
1.2147	1.41971	2.0038	2.05949	2.125	1.77725	2.24313		1.35203	1.51387	1.32588	1.31338	1.23741	1.25191	1.15574
1.21429	1.42124	2.00235	2.06	2.12255	1.78349	2.2335		1.35221	1.51359	1.32656	1.31255	1.23762	1.25184	1.15593
1.21412	1.42184	2.00211	2.06208	2.12208	1.78428	2.23157		1.35374	1.51332	1.32665	1.31219	1.23841	1.25165	1.15619
1.2141	1.42212	1.99888	2.06389	2.11974	1.78489	2.22937		1.35553	1.51277	1.32675	1.31207	1.23869	1.25155	1.15652
1.21389	1.42292	1.99867	2.0662	2.11806	1.78582	2.22926		1.35711	1.51194	1.32769	1.31204	1.23943	1.25089	1.15705
1.21321	1.42298	1.99867	2.06988	2.11199	1.78601	2.22908		1.35732	1.5112	1.3299	1.312	1.23975	1.25057	1.15713
1.21308	1.42356	1.99861	2.07063	2.10977	1.78625	2.22777		1.35758	1.51097	1.32993	1.31195	1.24016	1.25046	1.15736
1.21305	1.42413	1.99852	2.07179	2.10954	1.78687	2.22215		1.35817	1.51011	1.33044	1.31174	1.24048	1.25031	1.15741
1.21302	1.4252	1.99819	2.07223	2.10761	1.78709	2.21959		1.35999	1.50936	1.33263	1.31159	1.24082	1.25024	1.15759
1.21167	1.42716	1.99746	2.07576	2.10638	1.7886	2.21927		1.36008	1.50839	1.3331	1.31155	1.24093	1.25024	1.15781
1.2115	1.42795	1.99726	2.07579	2.10623	1.78896	2.21705		1.3605	1.50781	1.3359	1.31031	1.24128	1.24963	1.15814
1.21144	1.42921	1.99354	2.07641	2.10467	1.79101	2.21674		1.36107	1.50776	1.33599	1.30978	1.24143	1.24946	1.15826
1.21117	1.43023	1.98687	2.07744	2.09977	1.79365	2.21428		1.36128	1.50742	1.33625	1.30958	1.24155	1.24937	1.15828
1.21116	1.43432	1.98667	2.07904	2.09757	1.79369	2.21373		1.36399	1.50611	1.33636	1.30936	1.24205	1.24911	1.15864
1.21027	1.43434	1.98013	2.07951	2.08841	1.79402	2.21183		1.36418	1.50549	1.33684	1.30928	1.24245	1.249	1.15865
1.20924	1.43497	1.97874	2.0809	2.08631	1.79575	2.21074		1.36453	1.50549	1.34047	1.30928	1.24252	1.2489	1.15908
1.20817	1.43666	1.97799	2.08737	2.08388	1.79622	2.20805		1.36461	1.5053	1.34095	1.30894	1.24276	1.24884	1.15974
1.2081	1.4368	1.97484	2.08744	2.08101	1.79634	2.20776		1.36491	1.50465	1.34134	1.3089	1.24276	1.24873	1.15979
1.20791	1.43725	1.97388	2.09002	2.07922	1.79739	2.20722		1.36494	1.50455	1.34203	1.30844	1.24295	1.24806	1.16028
1.20785	1.43777	1.97326	2.09291	2.07634	1.79768	2.20718		1.3653	1.50394	1.34208	1.30785	1.24316	1.24738	1.16034
1.20771	1.43795	1.97039	2.09306	2.07327	1.79833	2.20481		1.36542	1.50389	1.34294	1.30717	1.2432	1.24712	1.16043
1.20752	1.43855	1.96644	2.09334	2.07249	1.80016	2.20318		1.3659	1.50272	1.34302	1.30716	1.24349	1.2468	1.16073
1.20739	1.43895	1.96511	2.09529	2.07201	1.80386	2.20282		1.3661	1.50167	1.34432	1.30656	1.24389	1.24672	1.16089
1.20705	1.44041	1.96481	2.09714	2.0704	1.80491	2.19978		1.36617	1.50118	1.34511	1.30645	1.24505	1.24667	1.16093
1.20704	1.44105	1.96274	2.09773	2.07013	1.80546	2.19964		1.36629	1.50039	1.34512	1.30623	1.24522	1.24655	1.16111
1.20667	1.44211	1.9566	2.09913	2.0667	1.80582	2.19874		1.36968	1.5002	1.34599	1.30614	1.24571	1.24625	1.16115
1.2065	1.44275	1.95146	2.10067	2.06641	1.80831	2.19639		1.36973	1.49896	1.34616	1.30597	1.24596	1.24605	1.16122
1.20617	1.44329	1.9507	2.10363	2.06387	1.80947	2.19016		1.37116	1.49799	1.34638	1.30578	1.24607	1.2458	1.16144
1.20471	1.44468	1.94714	2.10579	2.05873	1.8106	2.18867		1.37133	1.49759	1.34679	1.30565	1.24683	1.24579	1.1615
1.20456	1.44536	1.94553	2.11008	2.05668	1.81072	2.18633		1.37143	1.49722	1.34682	1.30528	1.24735	1.24559	1.162
1.20343	1.44683	1.94405	2.11503	2.05653	1.81412	2.18589		1.37175	1.49587	1.34683	1.30414	1.2476	1.24551	1.16243
1.20321	1.44754	1.94283	2.11591	2.05643	1.81527	2.18378		1.37203	1.49577	1.34928	1.3035	1.24792	1.24508	1.1626
1.20287	1.44873	1.9398	2.1192	2.05637	1.81729	2.18214		1.37285	1.49519	1.34942	1.30342	1.24837	1.24499	1.16273
1.20187	1.44941	1.93778	2.12016	2.05565	1.82165	2.18049		1.373	1.49465	1.35024	1.30267	1.24888	1.24475	1.163
1.20176	1.44952	1.93301	2.12035	2.05513	1.8247	2.18043		1.37322	1.49414	1.35045	1.30263	1.24896	1.24408	1.16361
1.20174	1.45682	1.92835	2.12248	2.05466	1.82538	2.17968		1.37354	1.49412	1.35081	1.30256	1.24909	1.24378	1.16441
1.20169	1.45854	1.92726	2.12345	2.05417	1.82549	2.17759		1.37363	1.49402	1.35088	1.30218	1.24917	1.2436	1.16488
1.20046	1.45986	1.92487	2.12424	2.05254	1.82781	2.17747		1.37383	1.494	1.3519	1.30105	1.24922	1.24345	1.16535
1.2001	1.461	1.92479	2.12441	2.05011	1.82804	2.17738		1.37386	1.49176	1.3519	1.30101	1.24979	1.24321	1.16616
1.19996	1.46248	1.92415	2.12521	2.04953	1.8281	2.1699		1.37433	1.49028	1.3519	1.30099	1.25021	1.24318	1.1667
1.19934	1.46326	1.92236	2.12927	2.04795	1.82915	2.16861		1.37436	1.49013	1.35298	1.30053	1.25054	1.24289	1.16727
1.19926	1.46361	1.92014	2.13	2.04394	1.83262	2.1675		1.37447	1.48987	1.35316	1.29995	1.25066	1.2424	1.16746
1.19903	1.46393	1.92011	2.13084	2.04024	1.83459	2.16614		1.3747	1.48957	1.35354	1.29906	1.25103	1.24191	1.16808
1.19883	1.46446	1.91895	2.13189	2.03887	1.83489	2.1655		1.37634	1.48919	1.35383	1.2987	1.25103	1.24178	1.16839
1.19839	1.46735	1.91875	2.1324	2.03878	1.8349	2.16447		1.3768	1.4884	1.35436	1.29867	1.25162	1.24169	1.16855
1.1981	1.46896	1.91719	2.13255	2.03872	1.83791	2.16198		1.37685	1.48759	1.3544	1.29764	1.25186	1.24162	1.16858
1.19803	1.46912	1.91548	2.13289	2.03858	1.83791	2.16002		1.37758	1.48682	1.35485	1.29757	1.25231	1.24133	1.16876
1.19593	1.47262	1.91172	2.13525	2.03803	1.83801	2.15822		1.37776	1.48642	1.35541	1.29689	1.25237	1.24132	1.169
1.1952	1.47275	1.90736	2.13558	2.03458	1.83889	2.15689		1.37854	1.48558	1.35575	1.29685	1.2527	1.24127	1.16914
1.19404	1.47353	1.90701	2.13599	2.03286	1.84014	2.15674		1.37939	1.48478	1.35609	1.29664	1.25286	1.24069	1.16935
1.19402	1.47461	1.90502	2.13645	2.02559	1.84036	2.15204		1.37964	1.4841	1.35678	1.29643	1.25291	1.24066	1.16989
1.1936	1.47527	1.90444	2.1391	2.02518	1.84058	2.14943		1.38142	1.48384	1.35717	1.29599	1.25295	1.24045	1.17012
1.19355	1.4768	1.8976	2.14177	2.02365	1.84407	2.147		1.38204	1.48288	1.35856	1.29596	1.25375	1.23983	1.17014
1.19347	1.4774	1.89736	2.14274	2.02111	1.8445	2.14533		1.38296	1.48086	1.35869	1.2955	1.25418	1.23962	1.17037
1.19303	1.47773	1.89389	2.14363	2.01924	1.84535	2.14352		1.38322	1.48079	1.35904	1.29509	1.25444	1.23951	1.17044
1.19234	1.47802	1.89025	2.1462	2.01741	1.84538	2.14308		1.38332	1.48075	1.35963	1.29503	1.25448	1.23942	1.17149
1.19197	1.47802	1.88952	2.14647	2.01354	1.84718	2.14073		1.3835	1.48062	1.35976	1.2948	1.25453	1.23906	1.17171
1.19162	1.47815	1.8894	2.147	2.01316	1.84797	2.14058		1.38355	1.48061	1.3605	1.29447	1.25531	1.23877	1.17179
1.19114	1.48006	1.88804	2.15366	2.01253	1.84821	2.14054		1.38375	1.47997	1.36174	1.29439	1.25545	1.23874	1.17212
1.19016	1.48022	1.88688	2.15786	2.01038	1.84983	2.13876		1.38383	1.47913	1.36293	1.29357	1.25562	1.23869	1.17265
1.18973	1.48054	1.88393	2.1583	2.00716	1.85036	2.13792		1.38404	1.47895	1.36465	1.29331	1.25593	1.23842	1.17297
1.18931	1.48208	1.88325	2.15842	2.00702	1.85123	2.13423		1.38419	1.47825	1.36507	1.29329	1.25604	1.2383	1.17326
1.18905	1.48231	1.88089	2.16043	2.00607	1.85212	2.13413		1.38558	1.47791	1.36517	1.29254	1.25657	1.23827	1.17334
1.1883	1.48297	1.87957	2.16055	1.99313	1.85216	2.13272		1.38564	1.4777	1.36518	1.29222	1.25664	1.23757	1.17347
1.18776	1.48358	1.87839	2.16081	1.99003	1.85374	2.13218		1.38587	1.47709	1.36522	1.29199	1.25675	1.237	1.17356
1.18752	1.48371	1.87486	2.16208	1.98919	1.85377	2.12196		1.38599	1.47661	1.36645	1.29197	1.25729	1.23693	1.1737
1.18734	1.48413	1.87395	2.16574	1.98803	1.85468	2.12064		1.38614	1.47609	1.36681	1.29184	1.25743	1.23687	1.17377
1.18722	1.48419	1.8729	2.16592	1.98283	1.85499	2.11831		1.38663	1.4745	1.36796	1.29126	1.25743	1.23685	1.17397
1.18694	1.48448	1.87123	2.16628	1.9818	1.85502	2.11791		1.38664	1.47416	1.36831	1.29126	1.25755	1.23682	1.17443
1.18562	1.48497	1.86993	2.16651	1.97962	1.86062	2.11782		1.38698	1.47363	1.3691	1.29096	1.25786	1.23675	1.17461
1.18543	1.48678	1.86844	2.16684	1.97923	1.86144	2.117		1.38776	1.4726	1.36935	1.29087	1.25826	1.23654	1.17481
1.18514	1.48795	1.86667	2.16815	1.97608	1.86197	2.11478		1.38845	1.47199	1.36958	1.29025	1.25897	1.2361	1.17507
1.1848	1.48798	1.86499	2.16942	1.976	1.86214	2.11433		1.38873	1.47116	1.36975	1.2902	1.25906	1.23561	1.17524
1.18466	1.4887	1.86386	2.16952	1.97583	1.86313	2.11229		1.38912	1.47014	1.37024	1.29016	1.25932	1.23545	1.17525
1.18455	1.48899	1.86029	2.17054	1.97288	1.86415	2.11069		1.38973	1.46986	1.37087	1.28895	1.25938	1.23538	1.17574
1.18418	1.48902	1.85986	2.17847	1.97089	1.86593	2.10679		1.38973	1.46804	1.3719	1.28819	1.25975	1.23504	1.17596
1.18303	1.48975	1.85978	2.1786	1.97064	1.86643	2.10602		1.38999	1.46734	1.37224	1.28806	1.2603	1.23448	1.17621
1.18227	1.49029	1.85919	2.1795	1.97004	1.86785	2.10565		1.39011	1.46656	1.37235	1.28778	1.26057	1.23394	1.17635
1.18219	1.49212	1.85904	2.18548	1.96847	1.86932	2.10478		1.39049	1.46635	1.37402	1.28743	1.26114	1.23291	1.17735
1.18133	1.49412	1.85671	2.18773	1.96844	1.86968	2.1042		1.39107	1.46577	1.37482	1.28687	1.26141	1.23218	1.17787
1.18042	1.49568	1.85212	2.18781	1.96594	1.87415	2.10413		1.3913	1.46574	1.3763	1.28687	1.26145	1.23143	1.17793
1.17967	1.49625	1.84895	2.18785	1.96517	1.87471	2.10262		1.39161	1.46504	1.3766	1.28654	1.26159	1.2312	1.17794
1.17794	1.49643	1.84792	2.18881	1.96319	1.87501	2.10183		1.3922	1.46486	1.37735	1.28641	1.2617	1.23035	1.17832
1.17665	1.4979	1.84371	2.19112	1.96294	1.87508	2.10181		1.39233	1.46469	1.37802	1.28634	1.26185	1.23018	1.1785
1.17624	1.49839	1.84037	2.19115	1.9625	1.87633	2.0927		1.39279	1.46421	1.37957	1.28625	1.26205	1.23016	1.17868
1.17561	1.49892	1.83663	2.19159	1.96065	1.87706	2.08697		1.39296	1.46371	1.38006	1.28594	1.26217	1.22964	1.17993
1.17484	1.49941	1.83571	2.19331	1.95701	1.87754	2.08323		1.39333	1.46214	1.38163	1.28575	1.26221	1.22961	1.18041
1.17483	1.49962	1.83463	2.19528	1.95443	1.8776	2.08301		1.39354	1.46211	1.38164	1.28574	1.26418	1.22945	1.18052
1.17469	1.50035	1.8321	2.1966	1.9542	1.8787	2.08204		1.39356	1.46201	1.38206	1.28509	1.26479	1.22925	1.18053
1.174	1.50081	1.83156	2.19663	1.95387	1.87893	2.08081		1.39395	1.46109	1.38583	1.28486	1.26526	1.22923	1.18074
1.17301	1.50161	1.8306	2.19689	1.95263	1.87901	2.08061		1.39426	1.46106	1.38604	1.28467	1.26527	1.22913	1.18083
1.17155	1.50284	1.83055	2.19858	1.95223	1.87921	2.07527		1.39444	1.46074	1.38647	1.28411	1.26566	1.22903	1.18084
1.17098	1.50335	1.82608	2.19872	1.95207	1.87982	2.073		1.39447	1.46071	1.38726	1.28406	1.26636	1.22891	1.18095
1.1709	1.50495	1.82524	2.19873	1.95119	1.88155	2.07299		1.39454	1.46069	1.38774	1.28374	1.26656	1.22886	1.18095
1.17072	1.50501	1.82242	2.19912	1.9503	1.88158	2.06968		1.39577	1.45914	1.38985	1.2835	1.26681	1.22875	1.18159
1.16978	1.50507	1.82204	2.20124	1.94749	1.88236	2.06939		1.39582	1.45901	1.39029	1.28199	1.26773	1.22874	1.18172
1.16956	1.50551	1.82069	2.20773	1.94561	1.8841	2.06891		1.39588	1.45888	1.39091	1.28167	1.26816	1.2283	1.18277
1.16899	1.50575	1.81784	2.20775	1.94375	1.88443	2.06587		1.39621	1.4587	1.39176	1.28152	1.26876	1.22786	1.18314
1.1678	1.50635	1.81085	2.20785	1.94287	1.88471	2.06301		1.39651	1.45792	1.39224	1.28112	1.26921	1.22779	1.18397
1.16695	1.50665	1.80927	2.20966	1.93945	1.88617	2.06189		1.39679	1.45791	1.39301	1.28108	1.26938	1.22777	1.18429
1.1669	1.50691	1.8063	2.21042	1.93753	1.88734	2.05723		1.39832	1.45714	1.39413	1.28075	1.26977	1.22708	1.18551
1.16689	1.50708	1.80403	2.21065	1.93569	1.88825	2.05555		1.39836	1.45634	1.39472	1.28048	1.27038	1.22656	1.18598
1.16684	1.5073	1.80382	2.21211	1.9348	1.88899	2.05536		1.39915	1.45612	1.39641	1.28037	1.27066	1.22621	1.18608
1.16671	1.50925	1.80295	2.21295	1.93402	1.88962	2.05213		1.40025	1.45579	1.39691	1.27999	1.27094	1.22593	1.18622
1.16601	1.50926	1.80115	2.21381	1.93313	1.89011	2.04944		1.40035	1.45574	1.39873	1.27951	1.27094	1.22573	1.18662
1.16598	1.51126	1.80071	2.21769	1.93196	1.89046	2.04941		1.40091	1.45539	1.39924	1.27929	1.27156	1.22573	1.18811
1.16579	1.51162	1.80041	2.21842	1.93109	1.89092	2.04892		1.40176	1.45532	1.39987	1.27882	1.27203	1.22562	1.18831
1.16541	1.51447	1.7987	2.21876	1.93079	1.89305	2.04681		1.40184	1.45523	1.40031	1.27873	1.27207	1.22475	1.18844
1.16418	1.51536	1.79772	2.2193	1.93049	1.89422	2.04641		1.40185	1.45506	1.40037	1.27873	1.27226	1.22475	1.18901
1.16362	1.51708	1.79618	2.2202	1.92869	1.89482	2.04579		1.40223	1.45448	1.40077	1.27774	1.27246	1.22465	1.18982
1.16297	1.51919	1.79461	2.22061	1.92636	1.89488	2.04553		1.40391	1.45401	1.40091	1.27711	1.27283	1.22426	1.18986
1.16257	1.51961	1.79436	2.22271	1.92557	1.89679	2.04513		1.40469	1.45381	1.40114	1.27704	1.27354	1.22408	1.19014
1.16098	1.52125	1.79333	2.22279	1.92494	1.89698	2.04016		1.405	1.45377	1.40133	1.27641	1.27389	1.22401	1.19027
1.16093	1.52215	1.78725	2.22848	1.92335	1.89783	2.03775		1.40514	1.45265	1.40202	1.27555	1.2741	1.22316	1.19033
1.16046	1.52217	1.78487	2.23031	1.92169	1.89846	2.03593		1.40556	1.45263	1.40297	1.27546	1.27414	1.22277	1.19038
1.15999	1.52387	1.78444	2.23155	1.92056	1.90123	2.02749		1.40574	1.45226	1.40535	1.27504	1.27438	1.22262	1.19047
1.15959	1.52402	1.77879	2.23237	1.91914	1.90133	2.02649		1.40623	1.45083	1.4065	1.27502	1.27469	1.22239	1.1907
1.15896	1.52635	1.77855	2.23324	1.91694	1.90257	2.02555		1.40705	1.4484	1.4078	1.2749	1.27492	1.22237	1.19092
1.15874	1.52854	1.77359	2.23591	1.91406	1.9045	2.02403		1.40811	1.44771	1.40792	1.27469	1.2753	1.22218	1.19114
1.1583	1.52855	1.77335	2.23602	1.91387	1.90482	2.02175		1.40821	1.44644	1.40823	1.27439	1.27553	1.22213	1.19135
1.15811	1.52908	1.77197	2.2373	1.91332	1.90591	2.02086		1.40891	1.44619	1.4088	1.27374	1.27557	1.22185	1.1921
1.15719	1.52969	1.76884	2.23739	1.91288	1.90957	2.01923		1.40897	1.44551	1.41088	1.27367	1.27597	1.22177	1.19245
1.15645	1.53259	1.76443	2.23879	1.91056	1.91036	2.01899		1.40968	1.44539	1.41223	1.27316	1.27716	1.22093	1.19264
1.15606	1.53286	1.76352	2.24209	1.90911	1.91119	2.01313		1.4097	1.44536	1.41452	1.27297	1.27832	1.22084	1.19313
1.15518	1.53336	1.75782	2.24494	1.90842	1.91146	2.01203		1.41179	1.44536	1.415	1.27286	1.27856	1.22074	1.19432
1.15514	1.53465	1.75605	2.24513	1.9069	1.91283	2.01195		1.41309	1.44496	1.41599	1.27262	1.279	1.22063	1.19474
1.15487	1.53482	1.75523	2.24536	1.90578	1.91318	2.00911		1.41348	1.44468	1.41635	1.27255	1.27915	1.22052	1.1948
1.15472	1.53496	1.74888	2.24665	1.90551	1.91499	2.00891		1.41374	1.44449	1.41674	1.27253	1.27953	1.22037	1.19607
1.15446	1.5359	1.74574	2.24742	1.8998	1.9154	2.00725		1.41405	1.44446	1.41677	1.27193	1.27989	1.2203	1.19652
1.15417	1.53845	1.74536	2.249	1.89631	1.91845	2.00641		1.41412	1.44379	1.41887	1.27156	1.2799	1.21961	1.1967
1.15392	1.53866	1.74173	2.24986	1.894	1.92062	2.00349		1.41433	1.44368	1.41936	1.2711	1.28039	1.2191	1.19721
1.15195	1.54062	1.74081	2.2522	1.8918	1.92082	2.00269		1.41446	1.44365	1.42147	1.27108	1.28039	1.21904	1.19732
1.15148	1.5417	1.74065	2.25243	1.89118	1.92166	1.99977		1.41504	1.44335	1.42233	1.27055	1.28054	1.219	1.19735
1.15148	1.54249	1.74055	2.25407	1.89062	1.92293	1.99953		1.41519	1.44309	1.42301	1.27054	1.28063	1.21872	1.19768
1.15148	1.54428	1.74007	2.25951	1.89048	1.92444	1.9989		1.41523	1.44301	1.4231	1.27048	1.28064	1.21861	1.19784
1.15125	1.54545	1.73632	2.26045	1.88966	1.925	1.99444		1.41644	1.44182	1.42313	1.27028	1.28208	1.21849	1.19785
1.15042	1.54547	1.73587	2.26074	1.88523	1.92556	1.99041		1.41701	1.44076	1.42361	1.26982	1.28214	1.21847	1.19791
1.15036	1.54592	1.73583	2.26224	1.88135	1.9257	1.98397		1.41714	1.43868	1.42508	1.26939	1.28272	1.21808	1.19812
1.14972	1.54934	1.73254	2.26281	1.8781	1.92697	1.98341		1.4175	1.43845	1.42605	1.26931	1.28385	1.21732	1.19841
1.14867	1.55096	1.73232	2.26449	1.87755	1.92832	1.98017		1.41767	1.43811	1.42628	1.26922	1.28428	1.21723	1.19841
1.14772	1.55113	1.72786	2.26641	1.87721	1.93049	1.97624		1.41779	1.4377	1.42633	1.26848	1.28446	1.21714	1.19857
1.14747	1.55179	1.72711	2.26762	1.87686	1.93253	1.97186		1.41831	1.43712	1.42728	1.26808	1.28453	1.21677	1.19988
1.14704	1.55266	1.72317	2.26897	1.87595	1.93347	1.97109		1.41837	1.43565	1.42733	1.26784	1.2869	1.21625	1.19999
1.14692	1.55284	1.72023	2.26914	1.87503	1.93389	1.97016		1.41859	1.43528	1.42978	1.26684	1.28724	1.21607	1.2001
1.14667	1.55355	1.71815	2.27032	1.87421	1.93474	1.96941		1.4187	1.43509	1.43079	1.26611	1.28736	1.21591	1.20011
1.14649	1.55493	1.71801	2.27137	1.8736	1.93539	1.96772		1.41967	1.43466	1.43206	1.26607	1.28893	1.2159	1.20016
1.14649	1.55634	1.71381	2.27182	1.86908	1.93905	1.96704		1.42049	1.43443	1.43288	1.26564	1.28898	1.21564	1.20067
1.14607	1.55758	1.71212	2.27212	1.86842	1.93937	1.96607		1.42064	1.43359	1.43326	1.26555	1.28904	1.21554	1.20071
1.14556	1.56044	1.71025	2.27415	1.86568	1.94032	1.96077		1.42075	1.43353	1.43406	1.26539	1.28936	1.21549	1.20074
1.14545	1.56127	1.70908	2.27471	1.8641	1.94213	1.9589		1.42192	1.4317	1.4358	1.26516	1.29011	1.21542	1.20083
1.14486	1.56129	1.70411	2.27497	1.86244	1.94293	1.95855		1.42212	1.43125	1.436	1.26492	1.29058	1.21499	1.20114
1.14459	1.56538	1.70306	2.27902	1.8608	1.94539	1.95501		1.42284	1.43107	1.43616	1.26472	1.29107	1.21459	1.20162
1.14421	1.56584	1.70132	2.28395	1.85662	1.94742	1.95369		1.42325	1.431	1.4371	1.2644	1.2913	1.21455	1.20177
1.14401	1.56624	1.69708	2.28399	1.8558	1.95033	1.95301		1.42446	1.43086	1.43766	1.26373	1.29349	1.21445	1.20264
1.14368	1.56833	1.69658	2.2848	1.8551	1.95058	1.9501		1.42477	1.42914	1.44104	1.26373	1.29441	1.21407	1.2027
1.14329	1.5684	1.69339	2.2854	1.85166	1.9526	1.94871		1.42571	1.42818	1.44306	1.26341	1.29494	1.21348	1.20311
1.14284	1.56946	1.68892	2.28586	1.85164	1.95278	1.94803		1.42572	1.42671	1.44314	1.26322	1.29529	1.21348	1.20322
1.14262	1.57159	1.68773	2.28658	1.85072	1.95757	1.94609		1.42644	1.42626	1.44497	1.26322	1.29572	1.21343	1.20328
1.14228	1.57176	1.68379	2.28659	1.85069	1.95849	1.94184		1.42653	1.42617	1.44498	1.26322	1.29601	1.21339	1.20383
1.14168	1.57334	1.68212	2.29013	1.84998	1.95991	1.94039		1.42655	1.42568	1.44546	1.26303	1.29619	1.2125	1.20385
1.14134	1.57578	1.68055	2.29016	1.84962	1.96514	1.93498		1.42758	1.42567	1.44591	1.26299	1.29628	1.2122	1.20388
1.14102	1.57758	1.68046	2.29232	1.84515	1.96882	1.93363		1.4281	1.42469	1.44648	1.26266	1.29651	1.21181	1.20458
1.14095	1.57845	1.67991	2.29247	1.84328	1.97082	1.9291		1.42873	1.42438	1.44708	1.26258	1.29788	1.21169	1.20464
1.14075	1.57925	1.67482	2.29353	1.84304	1.97094	1.92867		1.42951	1.42376	1.44759	1.26254	1.29796	1.21149	1.20557
1.14015	1.57933	1.67388	2.29534	1.83708	1.97103	1.92761		1.43027	1.42266	1.44779	1.26253	1.29847	1.21048	1.20598
1.14	1.58119	1.67291	2.2975	1.83335	1.97242	1.92424		1.43048	1.42255	1.44787	1.26251	1.29859	1.20959	1.20683
1.13997	1.5813	1.67197	2.29806	1.83333	1.97255	1.92212		1.43059	1.42244	1.44953	1.26234	1.29863	1.20931	1.20689
1.13963	1.58217	1.67176	2.3017	1.8307	1.97798	1.9203		1.43089	1.42229	1.45114	1.26228	1.29903	1.20929	1.20713
1.13903	1.58834	1.66762	2.30417	1.82897	1.97873	1.91899		1.43098	1.42093	1.45384	1.26158	1.30026	1.20908	1.20717
1.13858	1.58912	1.66704	2.30518	1.82801	1.98011	1.91492		1.43111	1.42059	1.4542	1.26128	1.30205	1.2088	1.20768
1.138	1.59041	1.66436	2.3067	1.82641	1.98028	1.90708		1.43121	1.42044	1.4556	1.26125	1.30206	1.20826	1.2079
1.13798	1.59057	1.66223	2.30711	1.82582	1.98165	1.90622		1.43141	1.42009	1.45712	1.2608	1.30305	1.20792	1.20853
1.13784	1.5915	1.6607	2.31057	1.82575	1.98335	1.90542		1.43151	1.41984	1.45729	1.2603	1.30315	1.20777	1.20863
1.1376	1.59188	1.65987	2.31111	1.82488	1.98352	1.90404		1.43156	1.41947	1.45739	1.26027	1.30336	1.20756	1.20924
1.13753	1.59389	1.65319	2.3126	1.82456	1.98596	1.90251		1.43164	1.41903	1.45872	1.26014	1.30363	1.20751	1.21016
1.13746	1.59563	1.6529	2.31425	1.82325	1.98739	1.90064		1.43165	1.41891	1.45881	1.26007	1.30374	1.20737	1.21044
1.1371	1.596	1.65027	2.31501	1.82296	1.98771	1.89691		1.43305	1.4181	1.45944	1.25942	1.3046	1.20734	1.21051
1.137	1.59634	1.64998	2.31502	1.8228	1.98823	1.89313		1.43305	1.41779	1.45967	1.25918	1.30462	1.20729	1.21076
1.13652	1.5968	1.64997	2.31603	1.82123	1.98895	1.89259		1.4331	1.41765	1.46122	1.25913	1.30526	1.20692	1.21094
1.1364	1.59834	1.64862	2.31625	1.82013	1.99399	1.8909		1.43376	1.41736	1.4616	1.25893	1.30551	1.20661	1.21112
1.13635	1.59947	1.64716	2.3185	1.81838	1.99479	1.88403		1.43389	1.41692	1.46272	1.25837	1.30566	1.20658	1.21117
1.13611	1.60103	1.647	2.31857	1.81279	1.99804	1.88311		1.43564	1.4162	1.46286	1.25807	1.307	1.20649	1.212
1.1358	1.60155	1.64632	2.32104	1.81079	1.99816	1.88047		1.43643	1.41593	1.46338	1.25675	1.30745	1.20582	1.21261
1.13541	1.60246	1.64573	2.32121	1.80678	1.99961	1.87429		1.43751	1.41477	1.46542	1.25624	1.30866	1.20578	1.21301
1.13507	1.60344	1.64413	2.32257	1.80451	2.00012	1.87091		1.44032	1.41459	1.46568	1.25586	1.30976	1.20546	1.21326
1.13483	1.6041	1.64024	2.32345	1.79453	2.00018	1.86765		1.44032	1.4143	1.46746	1.25577	1.3101	1.20468	1.21366
1.13301	1.60515	1.63962	2.32835	1.79194	2.00067	1.86607		1.44117	1.41383	1.46758	1.25563	1.31071	1.20465	1.21375
1.13291	1.60574	1.63923	2.33193	1.79177	2.0019	1.86081		1.44188	1.41375	1.46762	1.25563	1.31134	1.2046	1.2142
1.1328	1.60689	1.63606	2.33318	1.79137	2.00204	1.86074		1.44234	1.41359	1.46817	1.25542	1.31263	1.20456	1.2145
1.1328	1.60704	1.63539	2.33408	1.78917	2.00251	1.8581		1.44266	1.41292	1.46903	1.25515	1.31277	1.20455	1.21492
1.13152	1.60963	1.63309	2.33631	1.78495	2.00488	1.85481		1.44281	1.41152	1.46908	1.25486	1.31384	1.20316	1.21536
1.13132	1.61029	1.62697	2.33761	1.78334	2.00559	1.85432		1.44342	1.41041	1.46927	1.25439	1.31461	1.2031	1.21592
1.13131	1.61037	1.62639	2.33797	1.78329	2.00889	1.85382		1.44354	1.41018	1.46947	1.25439	1.31485	1.20305	1.21648
1.13114	1.61077	1.62373	2.3398	1.77762	2.0089	1.85245		1.44365	1.40883	1.47019	1.25435	1.31514	1.203	1.21659
1.13094	1.61082	1.62004	2.34136	1.77673	2.00933	1.85132		1.44392	1.40873	1.47338	1.25399	1.31602	1.20297	1.21698
1.12995	1.61083	1.6157	2.34818	1.77658	2.01168	1.84807		1.44398	1.40839	1.47384	1.25364	1.31615	1.20279	1.21699
1.12988	1.61205	1.61502	2.35113	1.77631	2.01181	1.84363		1.44443	1.40814	1.47536	1.25349	1.31651	1.20221	1.21707
1.12959	1.61226	1.61487	2.35149	1.77068	2.01425	1.8414		1.44519	1.40795	1.47566	1.25301	1.31671	1.20221	1.21778
1.12927	1.61252	1.60879	2.35375	1.76782	2.01524	1.8413		1.44618	1.40764	1.47826	1.25278	1.31982	1.20159	1.21837
1.1278	1.61296	1.60643	2.35726	1.76696	2.01592	1.83997		1.44636	1.40724	1.47967	1.25256	1.31984	1.20154	1.2197
1.12768	1.61326	1.60428	2.35985	1.76641	2.01844	1.83973		1.44723	1.40683	1.48069	1.25211	1.31992	1.20143	1.22008
1.12695	1.61451	1.59463	2.36014	1.76519	2.02606	1.83814		1.4474	1.40636	1.48108	1.25209	1.32029	1.20117	1.22028
1.12654	1.61475	1.59235	2.36238	1.76044	2.02743	1.83806		1.44754	1.40633	1.48226	1.25198	1.32074	1.20114	1.22104
1.12621	1.61771	1.59005	2.36302	1.75942	2.02861	1.83501		1.44806	1.40628	1.48341	1.25082	1.32083	1.20076	1.22119
1.12602	1.61813	1.58931	2.3666	1.75673	2.03216	1.83134		1.44871	1.40519	1.48368	1.25075	1.3209	1.20059	1.22128
1.12506	1.6187	1.58816	2.36843	1.75477	2.03554	1.82085		1.44934	1.40473	1.48428	1.2499	1.32235	1.20048	1.22134
1.12505	1.61875	1.58561	2.37413	1.75409	2.03659	1.81857		1.44941	1.40315	1.4843	1.24988	1.32275	1.20025	1.22198
1.125	1.62004	1.58148	2.37485	1.74919	2.03819	1.81703		1.45017	1.40218	1.48442	1.24957	1.32343	1.20014	1.2238
1.12474	1.62103	1.58054	2.38716	1.74711	2.03978	1.81624		1.45112	1.4015	1.48484	1.24906	1.32435	1.19966	1.22472
1.12473	1.62151	1.5804	2.38896	1.74489	2.04021	1.81575		1.45131	1.40088	1.4865	1.24733	1.3245	1.1993	1.22514
1.12459	1.62314	1.57987	2.38981	1.74274	2.04106	1.81037		1.45257	1.40084	1.48721	1.24665	1.32453	1.19924	1.22516
1.12452	1.62381	1.57349	2.39273	1.73999	2.0414	1.808		1.45364	1.40072	1.48901	1.24654	1.32518	1.19889	1.22544
1.12439	1.62475	1.56402	2.39299	1.73507	2.04602	1.80367		1.45367	1.40029	1.49056	1.24646	1.32652	1.19873	1.22552
1.12423	1.6256	1.55637	2.39563	1.73442	2.04607	1.80348		1.45483	1.40025	1.49221	1.24645	1.32687	1.19843	1.22563
1.12418	1.62619	1.55557	2.39646	1.73216	2.04665	1.79628		1.45517	1.39992	1.49265	1.2464	1.32753	1.19724	1.2258
1.12379	1.62696	1.55523	2.3969	1.72934	2.0474	1.79609		1.45537	1.39944	1.49371	1.24638	1.32796	1.19718	1.22621
1.12363	1.62789	1.55102	2.40298	1.71881	2.04747	1.79383		1.45731	1.39942	1.4943	1.24582	1.32921	1.19717	1.227
1.12261	1.62805	1.54854	2.40464	1.71749	2.04861	1.78984		1.45741	1.3987	1.49858	1.24539	1.32967	1.19699	1.22731
1.12196	1.63027	1.54801	2.40625	1.71622	2.05228	1.78964		1.45785	1.39785	1.49959	1.24518	1.32988	1.19686	1.22787
1.12168	1.63041	1.54676	2.4075	1.7151	2.05246	1.78804		1.45791	1.39741	1.50127	1.24483	1.33028	1.19681	1.22802
1.12153	1.63057	1.54271	2.41107	1.71428	2.05255	1.78433		1.45825	1.39587	1.50226	1.24443	1.33135	1.19656	1.22836
1.12137	1.63111	1.54177	2.41429	1.7139	2.05314	1.78326		1.45829	1.39412	1.50346	1.24435	1.33256	1.19626	1.2284
1.12009	1.63285	1.53532	2.41462	1.71245	2.05634	1.7827		1.45843	1.39267	1.50364	1.24434	1.33376	1.19539	1.22864
1.11974	1.63296	1.53125	2.41516	1.7108	2.05663	1.77814		1.45893	1.39196	1.50398	1.24415	1.33388	1.19526	1.22874
1.1192	1.63479	1.52735	2.41871	1.70969	2.05751	1.77689		1.45925	1.39163	1.50488	1.24292	1.33588	1.19491	1.22893
1.11872	1.63489	1.52333	2.42214	1.70914	2.05821	1.76945		1.45926	1.39112	1.50877	1.24261	1.33592	1.19447	1.22996
1.11746	1.63607	1.52135	2.42396	1.70576	2.05859	1.76893		1.45951	1.39097	1.51065	1.24239	1.33628	1.19421	1.23035
1.11638	1.63616	1.51927	2.42452	1.70477	2.05874	1.76817		1.45993	1.39082	1.51153	1.2422	1.33684	1.19373	1.23062
1.11617	1.63702	1.51767	2.42722	1.70468	2.06065	1.76704		1.46056	1.38985	1.51208	1.242	1.33906	1.19371	1.23183
1.11592	1.63782	1.51715	2.4275	1.69883	2.06289	1.76703		1.46126	1.38927	1.51264	1.24179	1.3391	1.19213	1.23314
1.11563	1.63823	1.51576	2.42971	1.69676	2.06609	1.76587		1.46221	1.3866	1.52158	1.24178	1.33992	1.19148	1.23328
1.11453	1.63828	1.50896	2.43008	1.6805	2.07096	1.75805		1.46336	1.38567	1.5219	1.24105	1.34017	1.19091	1.2333
1.11448	1.63976	1.50815	2.43055	1.67899	2.07104	1.75659		1.46358	1.38558	1.52222	1.24093	1.3424	1.19047	1.23333
1.11418	1.6399	1.5081	2.43448	1.67832	2.07141	1.75022		1.46431	1.38555	1.52596	1.24076	1.34266	1.19047	1.23377
1.11237	1.64055	1.4983	2.43953	1.67698	2.07379	1.74998		1.46506	1.38497	1.52852	1.24059	1.34314	1.19038	1.23422
1.11232	1.6409	1.49807	2.44067	1.67113	2.07438	1.74971		1.46529	1.38426	1.52888	1.24056	1.34374	1.19017	1.23433
1.11229	1.64256	1.49573	2.44078	1.66525	2.07948	1.74802		1.46614	1.38354	1.53265	1.24017	1.34484	1.1899	1.23573
1.11197	1.64338	1.49297	2.44247	1.66123	2.08058	1.74694		1.46703	1.38339	1.53336	1.23995	1.34532	1.18969	1.2362
1.11183	1.64427	1.49227	2.44427	1.66077	2.08294	1.74293		1.46751	1.3833	1.53418	1.23983	1.34589	1.18952	1.23635
1.11178	1.64501	1.49095	2.44959	1.66076	2.08965	1.73785		1.46776	1.38269	1.53478	1.23913	1.34596	1.18936	1.23884
1.11121	1.6458	1.48813	2.45494	1.65819	2.09208	1.73639		1.46795	1.38257	1.53562	1.23901	1.34695	1.18903	1.24015
1.11073	1.64581	1.48457	2.45551	1.65632	2.09237	1.7284		1.46936	1.38248	1.53772	1.23875	1.34807	1.18893	1.24036
1.11041	1.64634	1.4822	2.45722	1.65619	2.09446	1.72608		1.47002	1.38212	1.54177	1.23857	1.3492	1.18863	1.24036
1.10978	1.64681	1.47389	2.46085	1.65364	2.09537	1.72339		1.47016	1.38091	1.54426	1.23826	1.35032	1.18858	1.24042
1.10942	1.64743	1.47372	2.46474	1.65251	2.10023	1.7205		1.4706	1.38068	1.546	1.23806	1.35092	1.18856	1.24051
1.10869	1.64753	1.47199	2.47109	1.64485	2.10124	1.71903		1.47088	1.37885	1.54608	1.23708	1.35373	1.18843	1.24099
1.10742	1.64892	1.46771	2.4722	1.64426	2.10311	1.71682		1.47247	1.37862	1.54776	1.23693	1.354	1.18817	1.24112
1.10718	1.64894	1.46667	2.4743	1.64326	2.10327	1.71653		1.47306	1.37789	1.54828	1.23592	1.35453	1.1879	1.24154
1.10695	1.64915	1.46653	2.47797	1.64323	2.10897	1.71493		1.47328	1.37694	1.54876	1.23566	1.35468	1.1876	1.24262
1.10632	1.64932	1.46634	2.48079	1.64098	2.10975	1.71119		1.47596	1.37651	1.55109	1.2356	1.35643	1.18752	1.24401
1.10565	1.65128	1.45894	2.48287	1.64055	2.10984	1.7046		1.47612	1.37563	1.55251	1.23493	1.35709	1.18734	1.24424
1.10527	1.65153	1.44951	2.48497	1.63734	2.11068	1.7037		1.47613	1.37485	1.55574	1.23396	1.3571	1.18715	1.24512
1.10492	1.65192	1.44905	2.48799	1.63579	2.11136	1.69177		1.47681	1.37451	1.564	1.23382	1.35848	1.18691	1.24536
1.10459	1.65962	1.44578	2.48988	1.63561	2.1118	1.69105		1.47685	1.37449	1.56521	1.23378	1.35864	1.18689	1.24538
1.10402	1.66059	1.44263	2.49079	1.62278	2.11232	1.68971		1.47774	1.37437	1.56561	1.23302	1.35904	1.18654	1.24587
1.10378	1.66449	1.44042	2.4935	1.62096	2.11265	1.68666		1.47777	1.37433	1.56589	1.23269	1.36044	1.18638	1.24668
1.10241	1.66473	1.43598	2.49999	1.61948	2.11313	1.68517		1.47778	1.37388	1.56977	1.23264	1.36245	1.18588	1.24721
1.10104	1.66474	1.4276	2.50181	1.61091	2.11328	1.68316		1.47809	1.37371	1.57626	1.23247	1.36377	1.18586	1.2474
1.101	1.66477	1.40595	2.50224	1.60583	2.11354	1.68123		1.47875	1.37365	1.57674	1.23235	1.36389	1.18584	1.24779
1.10056	1.66526	1.40107	2.50393	1.60346	2.11729	1.67976		1.47918	1.37352	1.57811	1.23166	1.36547	1.18571	1.2486
1.09973	1.66617	1.4	2.50825	1.6023	2.12036	1.67929		1.48095	1.37251	1.58114	1.23095	1.36678	1.18554	1.25109
1.09905	1.66894	1.3997	2.50997	1.58732	2.12089	1.67875		1.48128	1.37233	1.58196	1.23051	1.36693	1.18541	1.25152
1.09884	1.66898	1.3976	2.51176	1.58453	2.12165	1.66282		1.48213	1.37217	1.58397	1.23033	1.36945	1.18488	1.25159
1.09869	1.6693	1.39635	2.51269	1.57987	2.12195	1.65833		1.48234	1.37204	1.58491	1.22938	1.37234	1.18472	1.25209
1.09869	1.67154	1.3923	2.51699	1.57775	2.12294	1.65433		1.48246	1.37203	1.58493	1.22924	1.37236	1.18462	1.25256
1.09832	1.67281	1.38699	2.51935	1.57675	2.12547	1.65144		1.48256	1.37181	1.58533	1.22905	1.37282	1.18421	1.25405
1.09776	1.67341	1.38576	2.51948	1.5698	2.12626	1.65142		1.48269	1.3701	1.58537	1.2289	1.37321	1.18387	1.25444
1.0968	1.67351	1.38335	2.51993	1.56882	2.1275	1.65028		1.4829	1.37005	1.58754	1.22794	1.37438	1.18382	1.25449
1.09667	1.67363	1.36429	2.52091	1.56516	2.12802	1.64933		1.48406	1.36754	1.59101	1.22784	1.37556	1.18274	1.25458
1.09654	1.67419	1.36011	2.5212	1.5575	2.13164	1.64864		1.48407	1.36702	1.60043	1.22736	1.3771	1.18271	1.25522
1.09623	1.67523	1.36003	2.52122	1.5507	2.13472	1.64526		1.48485	1.36686	1.60099	1.227	1.3789	1.18263	1.25623
1.09608	1.67531	1.35051	2.52229	1.54723	2.13774	1.64366		1.48486	1.36636	1.60132	1.22622	1.37906	1.18256	1.25658
1.09574	1.67554	1.32722	2.52408	1.54662	2.13787	1.63927		1.48505	1.36531	1.60724	1.22597	1.37914	1.18228	1.25755
1.09541	1.67654	1.32573	2.52752	1.5457	2.14035	1.63912		1.48544	1.36475	1.6087	1.22577	1.3806	1.18217	1.25826
1.0953	1.67712	1.32299	2.53242	1.54282	2.14333	1.63752		1.48575	1.3643	1.60902	1.22571	1.38121	1.1812	1.25842
1.09526	1.67796	1.3179	2.53271	1.54134	2.14353	1.63601		1.48749	1.36357	1.61191	1.2247	1.38188	1.18113	1.25902
1.09505	1.6787	1.31764	2.53346	1.52811	2.14439	1.63383		1.48771	1.36268	1.61709	1.22454	1.38214	1.1808	1.25942
1.09478	1.68032	1.30709	2.53401	1.52704	2.14694	1.62318		1.48846	1.36261	1.61759	1.22441	1.38227	1.18073	1.26023
1.09429	1.68076	1.30468	2.53455	1.5269	2.14972	1.62109		1.4896	1.3621	1.61763	1.22435	1.38291	1.1804	1.26197
1.09281	1.68202	1.29384	2.53458	1.52509	2.15336	1.61558		1.49001	1.36173	1.61795	1.22333	1.38703	1.17993	1.26205
1.09247	1.68229	1.28265	2.53574	1.52362	2.15552	1.61524		1.49058	1.36092	1.61896	1.22327	1.38761	1.17971	1.26249
1.09245	1.68395	1.26791	2.53662	1.52104	2.15659	1.60529		1.49076	1.3606	1.62113	1.22226	1.38766	1.17968	1.26251
1.09046	1.68631	1.23608	2.53891	1.51846	2.1573	1.60312		1.49191	1.36057	1.63214	1.22134	1.38966	1.17967	1.26297
1.08951	1.68781	1.19953	2.54532	1.51819	2.15825	1.60135		1.49259	1.36051	1.64597	1.22125	1.39013	1.17963	1.26341
1.08849	1.68971	1.18765	2.54676	1.51698	2.1591	1.59919		1.49276	1.36018	1.66388	1.22042	1.39022	1.17929	1.26364
1.08848	1.69436	1.17268	2.54772	1.51482	2.16011	1.59882		1.49433	1.3592	1.66564	1.22022	1.39465	1.17898	1.26623
1.08835	1.6948	1.13497	2.55197	1.51469	2.16199	1.59849		1.49585	1.35888	1.6807	1.22011	1.39554	1.17892	1.26629
1.08792	1.69501	1.13084	2.55423	1.51375	2.16687	1.5935		1.49621	1.35851	1.68083	1.2195	1.39832	1.17881	1.26712
1.08741	1.69507	1.11219	2.55746	1.51365	2.16874	1.58343		1.49632	1.35814	1.6841	1.21943	1.40001	1.17842	1.26834
1.08711	1.69524	1.10012	2.55794	1.51314	2.17129	1.5825		1.49753	1.35793	1.69894	1.21887	1.40074	1.1779	1.26856
1.08707	1.6953	1.09025	2.56139	1.50723	2.17415	1.5822		1.4978	1.35791	1.71939	1.21745	1.40087	1.17785	1.26893
1.0858	1.69581	1.06312	2.56503	1.50001	2.17497	1.58177		1.4985	1.3579	1.73063	1.21722	1.40603	1.1778	1.26926
1.08468	1.69591	1.06158	2.56506	1.49779	2.1755	1.57749		1.50058	1.35786	1.76886	1.21705	1.40888	1.17689	1.27015
1.08432	1.69631	1.03969	2.56606	1.49665	2.17588	1.57557		1.50157	1.35574	1.86126	1.2169	1.40937	1.17666	1.27077
1.08302	1.69723	1.0207	2.56656	1.49624	2.17866	1.57238		1.50218	1.35571	2.13176	1.21653	1.40972	1.17641	1.27112
1.08202	1.69861		2.56685	1.4956	2.18091	1.57072		1.50303	1.35548		1.21628	1.41203	1.1761	1.27143
1.08145	1.70138		2.5669	1.4953	2.18154	1.57012		1.50345	1.35539		1.21561	1.41485	1.17574	1.27179
1.08097	1.70305		2.56718	1.49358	2.18239	1.56986		1.50454	1.35531		1.21545	1.41557	1.1754	1.27189
1.08027	1.70355		2.56794	1.48843	2.18273	1.55879		1.50468	1.35377		1.21503	1.4164	1.1748	1.27226
1.07906	1.70399		2.57049	1.48493	2.18398	1.55783		1.50495	1.35264		1.21495	1.417	1.17469	1.2724
1.07897	1.70644		2.57232	1.48313	2.18433	1.55689		1.50515	1.34994		1.21482	1.41785	1.17465	1.27485
1.07767	1.70818		2.5728	1.48148	2.18575	1.55274		1.50582	1.34906		1.21438	1.41874	1.17377	1.27496
1.07752	1.70881		2.57463	1.47999	2.18954	1.54691		1.50586	1.34887		1.21423	1.41891	1.17367	1.27577
1.07718	1.70957		2.5755	1.47755	2.18997	1.5423		1.50646	1.3483		1.214	1.42186	1.17309	1.2758
1.07665	1.70962		2.5768	1.47031	2.1906	1.54042		1.50727	1.34816		1.21252	1.42199	1.1729	1.27646
1.07664	1.71151		2.57744	1.46682	2.1957	1.53961		1.50753	1.34775		1.21248	1.42261	1.1729	1.27696
1.07498	1.71174		2.5778	1.46158	2.19654	1.53847		1.50757	1.3468		1.21237	1.42302	1.17281	1.27738
1.07436	1.71202		2.57816	1.45704	2.19776	1.53263		1.50845	1.34643		1.21228	1.4232	1.17255	1.27794
1.07351	1.71244		2.57878	1.44968	2.201	1.53104		1.50888	1.34489		1.21191	1.42374	1.17221	1.27866
1.07312	1.71297		2.57904	1.44726	2.20243	1.52585		1.50952	1.34482		1.21102	1.425	1.1722	1.28012
1.07199	1.71373		2.58082	1.44415	2.20449	1.52342		1.51046	1.34481		1.21099	1.42685	1.17158	1.28042
1.07123	1.71402		2.58105	1.44029	2.20491	1.52093		1.51075	1.34313		1.2108	1.42725	1.17111	1.28311
1.07085	1.7165		2.58111	1.42971	2.20523	1.51982		1.51086	1.34289		1.21057	1.42775	1.17089	1.28526
1.0706	1.71702		2.58144	1.42592	2.20679	1.5146		1.51092	1.34185		1.2096	1.42795	1.17064	1.28597
1.07045	1.71783		2.58469	1.41516	2.20741	1.5058		1.51176	1.33988		1.20949	1.4293	1.17044	1.28621
1.06993	1.71859		2.58686	1.41456	2.20968	1.50544		1.51696	1.33943		1.2094	1.42957	1.16987	1.28665
1.0697	1.72072		2.5901	1.40725	2.2177	1.50069		1.51724	1.33777		1.20883	1.43185	1.16972	1.28691
1.0696	1.72165		2.59033	1.40565	2.2195	1.49927		1.51755	1.33739		1.20799	1.43194	1.16905	1.2871
1.06952	1.72286		2.59509	1.39052	2.22372	1.49645		1.51851	1.33724		1.20781	1.43459	1.16873	1.28888
1.06923	1.7234		2.59555	1.38636	2.22592	1.49632		1.51935	1.33711		1.20736	1.44112	1.16856	1.29127
1.06899	1.72387		2.5958	1.3861	2.22679	1.493		1.51952	1.33705		1.20689	1.44161	1.16746	1.29129
1.06893	1.72483		2.59605	1.383	2.227	1.48884		1.51953	1.33693		1.20645	1.44333	1.16708	1.29138
1.06728	1.72506		2.59953	1.38217	2.23204	1.48601		1.51982	1.33394		1.20573	1.44364	1.16677	1.29225
1.06682	1.72511		2.60205	1.38078	2.23308	1.4849		1.52185	1.33376		1.20511	1.45079	1.16671	1.29231
1.06644	1.72595		2.60671	1.37995	2.23345	1.47596		1.52312	1.33234		1.20453	1.45603	1.1665	1.29235
1.06604	1.72719		2.60799	1.37839	2.23468	1.47142		1.52332	1.33147		1.20443	1.46102	1.16646	1.29299
1.06593	1.72822		2.61211	1.35666	2.23497	1.47007		1.52353	1.33086		1.20399	1.46202	1.16615	1.29657
1.06496	1.72909		2.61359	1.3537	2.23499	1.459		1.5239	1.33069		1.2039	1.46275	1.16589	1.29753
1.06461	1.73035		2.61515	1.33605	2.23609	1.4545		1.52634	1.33042		1.20377	1.46661	1.16586	1.29967
1.06429	1.73166		2.61821	1.30276	2.23679	1.45048		1.52753	1.33031		1.20361	1.46761	1.16582	1.30052
1.06379	1.73178		2.62374	1.29343	2.23781	1.45019		1.52809	1.32916		1.20321	1.47112	1.16566	1.30208
1.06352	1.73347		2.624	1.29041	2.24047	1.44952		1.52887	1.32908		1.20255	1.47214	1.16515	1.30652
1.06331	1.73459		2.62606	1.25429	2.24566	1.44788		1.52907	1.32896		1.20253	1.47533	1.16498	1.30703
1.06263	1.73526		2.63113	1.17929	2.24674	1.44313		1.52932	1.3289		1.20237	1.48164	1.16489	1.30747
1.06207	1.737		2.6312	1.16639	2.25114	1.44263		1.53018	1.32878		1.20216	1.48241	1.16489	1.30971
1.06187	1.73718		2.63261	1.1622	2.25187	1.44037		1.53041	1.32876		1.20214	1.48679	1.16488	1.30983
1.06183	1.73904		2.63712	1.12642	2.25601	1.43819		1.53074	1.32713		1.20176	1.4898	1.16447	1.3105
1.06166	1.73986		2.64397	1.11522	2.25695	1.43553		1.53134	1.3264		1.20139	1.49105	1.16425	1.31321
1.06086	1.74019		2.64401	1.09698	2.25721	1.43467		1.53339	1.32584		1.20133	1.50388	1.16402	1.31445
1.06001	1.74109		2.64494	1.08636	2.26162	1.43196		1.53401	1.32553		1.20073	1.50601	1.16394	1.3147
1.05993	1.74297		2.64591	1.04232	2.26683	1.42971		1.53522	1.32546		1.19981	1.50979	1.16386	1.31516
1.05954	1.74346		2.65021	1.03883	2.26691	1.42597		1.53601	1.32521		1.19926	1.53783	1.1631	1.31528
1.05926	1.7455		2.65056	0.999092	2.26792	1.42169		1.53637	1.3246		1.19898	1.55708	1.16297	1.31757
1.0592	1.74708		2.65132	0.957119	2.26794	1.40381		1.53857	1.32411		1.19825	1.58223	1.16263	1.32135
1.05917	1.7471		2.65192		2.26798	1.39121		1.53866	1.32382		1.19825		1.1623	1.3246
1.05808	1.74791		2.65495		2.26964	1.38702		1.53881	1.32375		1.19771		1.16154	1.32491
1.05727	1.74818		2.65558		2.27136	1.38476		1.53959	1.32261		1.19769		1.16116	1.32844
1.05647	1.75247		2.66428		2.27353	1.36399		1.53985	1.32186		1.1974		1.16075	1.32874
1.05633	1.75506		2.66769		2.27533	1.35752		1.54138	1.32126		1.19613		1.15997	1.32913
1.05582	1.75925		2.66849		2.27717	1.35211		1.5433	1.32061		1.19556		1.15981	1.33028
1.05446	1.7593		2.6694		2.27885	1.34375		1.54432	1.32059		1.19458		1.1596	1.33118
1.05427	1.76121		2.67112		2.27972	1.33376		1.5447	1.31913		1.19352		1.15938	1.33866
1.05401	1.76129		2.676		2.28255	1.32882		1.54477	1.31771		1.19279		1.15935	1.34188
1.05401	1.76156		2.67899		2.28381	1.3237		1.54585	1.31757		1.19253		1.15922	1.34416
1.05351	1.76337		2.68088		2.28429	1.32008		1.54586	1.31745		1.19243		1.15853	1.34774
1.05271	1.76447		2.68293		2.28581	1.30621		1.54675	1.3173		1.19221		1.15829	1.3501
1.05267	1.76497		2.6853		2.2865	1.29996		1.547	1.3173		1.19142		1.15826	1.35886
1.05212	1.76597		2.68671		2.2883	1.29609		1.54845	1.31619		1.19021		1.15691	1.36136
1.05174	1.76703		2.69059		2.2891	1.28127		1.5489	1.31617		1.19013		1.15684	1.3624
1.05074	1.76764		2.69215		2.28972	1.27374		1.54969	1.31571		1.18985		1.15674	1.36249
1.04988	1.76864		2.69268		2.29046	1.26209		1.54989	1.31543		1.18923		1.15646	1.37091
1.04984	1.76866		2.69366		2.29369	1.25704		1.5515	1.31505		1.18911		1.15617	1.37091
1.04903	1.7693		2.69487		2.29537	1.24758		1.55199	1.31238		1.18909		1.15615	1.3749
1.04889	1.77044		2.70226		2.29788	1.24383		1.5523	1.31171		1.18904		1.15588	1.37795
1.04853	1.77065		2.70591		2.29839	1.2389		1.55242	1.31109		1.18833		1.15587	1.37821
1.04805	1.7714		2.70693		2.29862	1.23678		1.55308	1.31071		1.18742		1.15551	1.3783
1.04786	1.77143		2.70895		2.30107	1.22677		1.55396	1.30851		1.18716		1.15535	1.38008
1.0468	1.77365		2.71165		2.3016	1.22661		1.55605	1.30832		1.18608		1.15522	1.38142
1.0465	1.7759		2.71716		2.30166	1.22297		1.55777	1.30802		1.18603		1.15512	1.38329
1.04633	1.77738		2.71751		2.30228	1.21706		1.55857	1.30771		1.18529		1.15508	1.38639
1.04617	1.77976		2.73194		2.30242	1.21593		1.55982	1.30733		1.18435		1.15483	1.38662
1.04345	1.78148		2.73386		2.30533	1.18278		1.56177	1.30669		1.18327		1.15444	1.3909
1.04343	1.78166		2.7362		2.30558	1.16566		1.56179	1.30633		1.18241		1.15434	1.39151
1.04262	1.78203		2.75447		2.3082	1.16129		1.56431	1.30389		1.18135		1.15413	1.39725
1.04213	1.78416		2.75472		2.30926	1.14568		1.56451	1.3034		1.18127		1.15369	1.39894
1.04097	1.78456		2.7639		2.31225	1.13825		1.5646	1.30297		1.18119		1.15361	1.39899
1.04077	1.78537		2.76707		2.31342	1.12195		1.5653	1.30279		1.18089		1.15302	1.40332
1.04065	1.78666		2.76898		2.31353	1.12142		1.56545	1.30276		1.17991		1.15296	1.40758
1.03966	1.78728		2.77727		2.31414	1.11787		1.56675	1.30254		1.17989		1.15164	1.40972
1.03959	1.78788		2.77773		2.31507	1.09704		1.56684	1.30232		1.17965		1.15086	1.41556
1.03956	1.78943		2.77947		2.31693	1.09612		1.56697	1.3022		1.17931		1.15066	1.42754
1.0393	1.79454		2.78293		2.31867	1.06734		1.56701	1.30197		1.17898		1.15061	1.4303
1.03911	1.79539		2.78374		2.32138	1.06405		1.5671	1.30147		1.17838		1.15024	1.4342
1.03839	1.79612		2.79097		2.32306	1.04859		1.56729	1.30112		1.17704		1.14938	1.43702
1.03824	1.79753		2.7943		2.3233	1.03371		1.5675	1.29966		1.17667		1.14917	1.45105
1.03816	1.7976		2.80142		2.32559	1.02541		1.56805	1.29961		1.17583		1.14902	1.45252
1.03748	1.79765		2.80537		2.32813	1.00459		1.57037	1.29925		1.17516		1.14896	1.45991
1.0367	1.79809		2.80586		2.33108	0.988883		1.57136	1.29881		1.1746		1.1479	1.46747
1.03665	1.79867		2.80633		2.33134	0.967639		1.57215	1.29846		1.17439		1.14743	1.46751
1.03617	1.79976		2.81403		2.33339	0.953188		1.57279	1.29721		1.17413		1.14689	1.47962
1.03552	1.80073		2.817		2.33433	0.937829		1.57378	1.29702		1.17338		1.14644	1.49257
1.03513	1.80137		2.81734		2.34269	0.915252		1.57528	1.29538		1.173		1.14563	1.49464
1.03507	1.80177		2.81855		2.34339			1.57651	1.29372		1.17196		1.1456
1.03486	1.80291		2.82151		2.34702			1.57707	1.29335		1.17188		1.14508
1.03463	1.80481		2.8225		2.34775			1.57733	1.29247		1.17073		1.14452
1.03316	1.80525		2.82299		2.34858			1.58024	1.29061		1.17021		1.14446
1.03209	1.80998		2.82514		2.35538			1.58043	1.28947		1.1695		1.14412
1.03205	1.81205		2.82917		2.35648			1.58129	1.28785		1.16924		1.14405
1.032	1.81943		2.83241		2.35802			1.58194	1.28758		1.16589		1.14391
1.03189	1.81961		2.83526		2.35826			1.58344	1.28577		1.16483		1.14361
1.03171	1.8203		2.83538		2.3604			1.58356	1.28473		1.16463		1.14313
1.03092	1.82037		2.84657		2.36324			1.5847	1.28459		1.16362		1.1428
1.03063	1.8208		2.84689		2.3645			1.58534	1.28272		1.16162		1.14276
1.02971	1.82144		2.85004		2.36665			1.58582	1.28269		1.16143		1.14267
1.02888	1.8215		2.85308		2.37214			1.58621	1.28258		1.16106		1.14257
1.02837	1.82362		2.85344		2.3769			1.58631	1.28248		1.16104		1.14254
1.02648	1.82388		2.85818		2.37803			1.58634	1.28068		1.16075		1.14176
1.02631	1.82429		2.86193		2.3782			1.58768	1.28018		1.16046		1.14151
1.02614	1.82483		2.86641		2.3787			1.58789	1.27974		1.15981		1.14051
1.02475	1.83217		2.86815		2.37881			1.58894	1.27957		1.15828		1.13995
1.02406	1.83554		2.8682		2.3799			1.58897	1.27833		1.15757		1.13948
1.02361	1.83723		2.87812		2.37992			1.59058	1.27757		1.15661		1.13862
1.02273	1.83735		2.88076		2.38033			1.59246	1.27715		1.15661		1.13862
1.02244	1.84086		2.88566		2.3866			1.59646	1.27684		1.15524		1.13736
1.02056	1.84193		2.89907		2.39412			1.59872	1.2762		1.15477		1.1372
1.01873	1.84394		2.89918		2.39538			1.59968	1.27584		1.15476		1.13607
1.01826	1.84498		2.90282		2.39677			1.6021	1.27397		1.15415		1.13516
1.01806	1.84549		2.90625		2.39698			1.60283	1.27354		1.15365		1.1343
1.01793	1.85083		2.90851		2.39792			1.60353	1.27306		1.15329		1.13302
1.01763	1.85115		2.90942		2.40132			1.6041	1.27157		1.15309		1.13232
1.01755	1.85148		2.91718		2.40256			1.60663	1.26985		1.15267		1.13165
1.01685	1.85213		2.91809		2.40267			1.60796	1.26964		1.15267		1.13161
1.01632	1.85317		2.92582		2.4051			1.61145	1.26886		1.15183		1.12908
1.01549	1.85362		2.93171		2.40584			1.61173	1.26765		1.14882		1.12901
1.01523	1.85431		2.93345		2.40618			1.61307	1.26667		1.1483		1.12884
1.01495	1.85544		2.94151		2.40712			1.61656	1.26589		1.14771		1.12881
1.01481	1.85738		2.94175		2.40738			1.61702	1.26525		1.1473		1.12799
1.01466	1.85776		2.94206		2.40818			1.61758	1.265		1.14705		1.12772
1.01397	1.86319		2.94216		2.40882			1.61822	1.26417		1.14705		1.12733
1.01327	1.86477		2.94741		2.4174			1.62046	1.26397		1.14559		1.12676
1.01207	1.86591		2.95148		2.42164			1.62156	1.26384		1.14412		1.12586
1.01073	1.86805		2.95505		2.4261			1.62178	1.26354		1.14375		1.1252
1.00964	1.86917		2.95837		2.42697			1.62243	1.26231		1.14029		1.12507
1.00775	1.87		2.96162		2.42999			1.62276	1.26156		1.14027		1.12501
1.00488	1.87141		2.97557		2.43252			1.62291	1.26091		1.13811		1.12451
1.0046	1.8726		2.98289		2.43326			1.62312	1.26028		1.1377		1.12371
1.00422	1.87525		2.98561		2.43433			1.62905	1.26017		1.13603		1.12322
1.00207	1.87558		2.98956		2.43536			1.62947	1.25979		1.13546		1.12213
1.00177	1.87637		2.99019		2.43731			1.6302	1.25926		1.13524		1.12188
1.00063	1.87837		2.99873		2.43736			1.63039	1.25768		1.13248		1.12119
1.0006	1.87848		3.00099		2.43753			1.63315	1.25331		1.13217		1.12091
1.00042	1.87866		3.00336		2.43888			1.63581	1.25219		1.13145		1.12063
1.00038	1.88061		3.01254		2.44037			1.63894	1.25199		1.13117		1.12041
1.00034	1.88268		3.01354		2.44137			1.63901	1.25168		1.13028		1.12034
1.00025	1.8827		3.01981		2.44156			1.64134	1.24955		1.13001		1.11976
1.0001	1.88642		3.02466		2.44291			1.64145	1.24923		1.12895		1.1196
1.00005	1.88672		3.0257		2.45223			1.64247	1.24882		1.12863		1.11929
0.999937	1.88678		3.04535		2.4565			1.64248	1.24821		1.12831		1.119
0.999882	1.8882		3.04893		2.46285			1.64296	1.24577		1.12682		1.11891
0.999788	1.88904		3.04916		2.46618			1.64499	1.24475		1.1253		1.11794
0.999596	1.8909		3.0497		2.46627			1.64544	1.24226		1.12428		1.11687
0.999217	1.89117		3.05647		2.47367			1.64765	1.24178		1.12317		1.11676
0.999165	1.8912		3.06287		2.47451			1.64927	1.24107		1.123		1.11665
0.998284	1.89432		3.07214		2.47599			1.65158	1.24065		1.1206		1.11659
0.996573	1.89697		3.07487		2.47649			1.65165	1.23812		1.1193		1.1159
0.995966	1.89785		3.07691		2.4773			1.65802	1.23719		1.11924		1.11588
0.99572	1.9024		3.08398		2.47742			1.65933	1.23661		1.11769		1.11588
0.99569	1.90421		3.08976		2.48455			1.66013	1.23505		1.11733		1.11523
0.9943	1.90464		3.09785		2.49777			1.66241	1.23351		1.11593		1.11504
0.993579	1.90492		3.10217		2.49938			1.66264	1.23349		1.11163		1.11451
0.992501	1.90638		3.10728		2.50136			1.66588	1.23248		1.11061		1.11376
0.992356	1.90731		3.10978		2.50773			1.67117	1.23206		1.1077		1.11353
0.986025	1.90931		3.11381		2.50815			1.67198	1.23168		1.10748		1.11335
0.984736	1.91275		3.11586		2.50922			1.67324	1.23145		1.10444		1.11319
0.984467	1.91803		3.12044		2.51376			1.67477	1.23125		1.10425		1.11241
0.983994	1.92199		3.13078		2.5169			1.67506	1.22973		1.10353		1.11196
0.982695	1.92712		3.13929		2.52078			1.67695	1.22938		1.09693		1.11187
0.982461	1.92739		3.14736		2.52384			1.67704	1.22933		1.09466		1.11119
0.982412	1.92949		3.15222		2.52424			1.67965	1.22834		1.09335		1.1105
0.982181	1.9305		3.15315		2.5267			1.68016	1.22786		1.09299		1.1104
0.981451	1.9349		3.1843		2.53			1.68386	1.22769		1.09294		1.1102
0.981406	1.93908		3.19841		2.53099			1.68439	1.22687		1.09126		1.11003
0.979021	1.9399		3.22571		2.53414			1.68909	1.2268		1.09049		1.10987
0.978936	1.93993		3.23371		2.53736			1.68948	1.22478		1.08994		1.10921
0.973985	1.94125		3.25758		2.54211			1.68975	1.22472		1.08845		1.10724
0.973781	1.94543		3.25977		2.54712			1.69143	1.22412		1.08621		1.10689
0.970772	1.9455		3.29704		2.54902			1.69204	1.22404		1.08465		1.10638
0.968224	1.94577		3.32564		2.54971			1.69331	1.22227		1.0825		1.10579
0.967598	1.94602		3.33429		2.54987			1.6939	1.22206		1.0796		1.10556
0.966912	1.94628		3.33544		2.54999			1.69612	1.22184		1.07594		1.1055
0.966632	1.94854		3.37062		2.55069			1.69897	1.22164		1.07529		1.10508
0.966591	1.95131		3.39454		2.55467			1.69939	1.22124		1.07499		1.10424
0.966214	1.95334		3.41911		2.56097			1.70051	1.22113		1.07462		1.10315
0.965956	1.95807		3.42544		2.56124			1.70108	1.2202		1.07122		1.10138
0.965862	1.97468		3.43313		2.56435			1.702	1.21988		1.06963		1.10021
0.965774	1.97501		3.49777		2.57058			1.70229	1.21928		1.06802		1.09956
0.965553	1.97604		3.50276		2.57464			1.70289	1.21857		1.05449		1.09931
0.964632	1.97707		3.5189		2.57723			1.70522	1.21807		1.05308		1.09819
0.9646	1.97732		3.53789		2.57859			1.70673	1.21762		1.05245		1.09802
0.963255	1.97747		3.66796		2.58233			1.70708	1.2154		1.03904		1.09793
0.961959	1.98011		3.71599		2.58271			1.70776	1.2148		1.01713		1.09785
0.959087	1.9805		3.83939		2.58323			1.70839	1.21464		1.00652		1.09765
0.958919	1.98055		3.8617		2.58342			1.71393	1.21374		1.002		1.09763
0.958819	1.98193		3.93693		2.58379			1.71989	1.21321		0.999595		1.09684
0.957031	1.98581		3.9421		2.58504			1.72013	1.21137		0.995377		1.09652
0.956836	1.98675		4.22757		2.58548			1.72367	1.2085		0.961213		1.0941
0.956346	1.99329				2.58817			1.73349	1.20844				1.09357
0.955016	1.99461				2.58877			1.73668	1.20677				1.09355
0.953234	1.99595				2.5917			1.74471	1.20676				1.09335
0.952609	1.99608				2.59612			1.7461	1.20406				1.09304
0.952328	1.99688				2.59668			1.74646	1.20042				1.09276
0.950825	2.00239				2.60139			1.74829	1.19449				1.09263
0.94984	2.00345				2.60141			1.75153	1.19406				1.0922
0.949132	2.0052				2.60231			1.7561	1.19338				1.09176
0.948661	2.00783				2.6049			1.76447	1.19192				1.09087
0.947785	2.00952				2.61064			1.76924	1.18908				1.0902
0.947098	2.01247				2.61226			1.77236	1.18789				1.08993
0.94667	2.01437				2.63098			1.77384	1.18733				1.08977
0.945987	2.01495				2.63196			1.7746	1.1866				1.08823
0.94414	2.01523				2.63403			1.77734	1.18613				1.08736
0.94399	2.0221				2.63604			1.79407	1.18585				1.08728
0.942548	2.02754				2.63732			1.8064	1.18526				1.08703
0.941047	2.02785				2.63991			1.80649	1.18359				1.08688
0.940223	2.03086				2.6475			1.80722	1.18262				1.08621
0.939511	2.03602				2.65383			1.80982	1.17858				1.08585
0.936612	2.03689				2.65535			1.81122	1.17842				1.08521
0.933305	2.04887				2.65606			1.81198	1.17717				1.08434
0.927292	2.05565				2.65949			1.81587	1.17697				1.08401
0.92481	2.05603				2.66224			1.82093	1.17574				1.08331
0.924428	2.05923				2.66777			1.83027	1.17348				1.08307
0.923775	2.06039				2.66973			1.83186	1.17107				1.08287
0.923549	2.06334				2.67304			1.83299	1.1691				1.08109
0.923502	2.06484				2.6796			1.83468	1.1675				1.07973
0.92222	2.06685				2.68864			1.83894	1.16289				1.07852
0.917446	2.08281				2.69384			1.84711	1.16119				1.07666
0.917067	2.08806				2.6946			1.84846	1.16049				1.07633
0.91557	2.09523				2.69485			1.8495	1.157				1.07544
0.91246	2.10561				2.6987			1.85034	1.15498				1.0749
0.912076	2.12158				2.6992			1.85561	1.14861				1.07423
0.910267	2.12331				2.71864			1.86713	1.14825				1.07394
0.910125	2.1255				2.73807			1.86931	1.14518				1.07379
0.90962	2.12751				2.74547			1.87164	1.14394				1.07239
0.909428	2.14629				2.7516			1.87702	1.13992				1.07195
0.907333	2.15159				2.7605			1.87807	1.13664				1.0649
0.906278	2.15995				2.76367			1.88092	1.13553				1.06468
0.895454	2.16092				2.76749			1.89513	1.13427				1.06414
0.891723	2.16104				2.76891			1.89631	1.13414				1.06253
0.891247	2.163				2.78448			1.90457	1.13379				1.06206
0.889496	2.1747				2.78811			1.90827	1.13194				1.06084
0.882749	2.1792				2.80462			1.92909	1.13017				1.05963
0.882729	2.19095				2.81574			1.9563	1.12993				1.05882
0.880138	2.19579				2.82096			1.95805	1.1236				1.05851
0.872549	2.19621				2.84098			1.9713	1.11539				1.05805
0.866049	2.20235				2.84468			1.99309	1.11287				1.05657
0.849727	2.20481				2.84907			1.99818	1.10926				1.05473
0.849704	2.22068				2.85119			2.02806	1.10623				1.05463
0.844633	2.22177				2.86556			2.08056	1.10479				1.05296
0.83583	2.23028				2.87406			2.10689	1.1036				1.05225
0.834047	2.23076				2.88161			2.24871	1.10064				1.05182
	2.25215				2.92396				1.09861				1.05114
	2.31719				2.97337				1.0927				1.04432
	2.32174				3.05043				1.05477				1.03976
	2.32309				3.05771				1.04072				1.03801
	2.39571				3.0715				1.0379				1.0379
	2.46307				3.08				1.03031				1.03456
	2.51558				3.08359				1.02036				1.0211
					3.10442								1.02003
					3.21552								1.01315
					3.21579								1.00892
					3.35252								1.00149
					3.43072								1.00014
					3.58979								0.979256
					3.85975								0.955995
